# Supplementary material for: PIMT Controls Insulin Synthesis and Secretion through PDX1
Source: MDPI journal article supplement (doi:10.3390/ijms24098084), 2023-04-29
Supplement: s1 [file s1]

## **PIMT controls insulin synthesis and secretion through PDX1**

Sharma R<sup>1, #</sup>, Sujay K Maity<sup>2</sup>, Partha Chakrabarti<sup>2</sup>, Madhumohan R Katika<sup>3</sup>,  
Satyamoorthy Kapettu<sup>4</sup>, Kishore V. L. Parsa<sup>1\*</sup> and Parimal Misra<sup>1\*</sup>

### **Supplementary data**

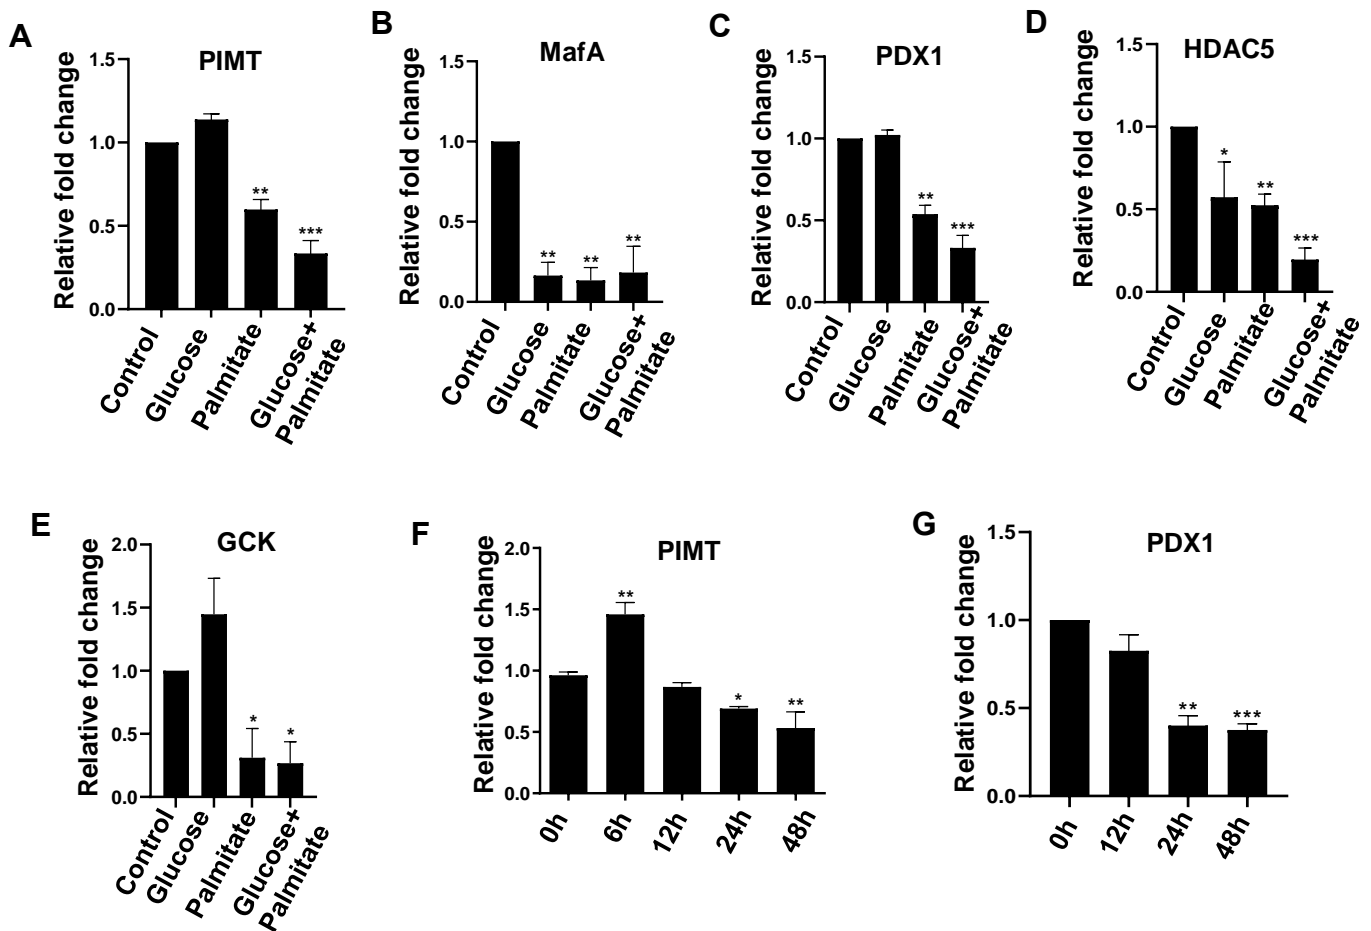

**Figure S1. PIMT levels were decreased in BRIN-BD11 cells exposed to glucolipotoxicity and HFD-fed mice islets.** A-E) Densitometric quantification of western blot shown in the Figure 1A. F) Densitometric quantification of PIMT western blot shown in the Figure 1G. G) Densitometric quantification of PDX1 western blot shown in the Figure 1H. Data are a representative of three independent experiments. Numerical data are shown as mean  $\pm$  SD.

Statistical analysis was performed using Tukey's multiple comparison test. A  $p < 0.05$ ; \*\*,  $p < 0.01$ ; \*\*\*,  $p < 0.001$  value was considered statistically significant.

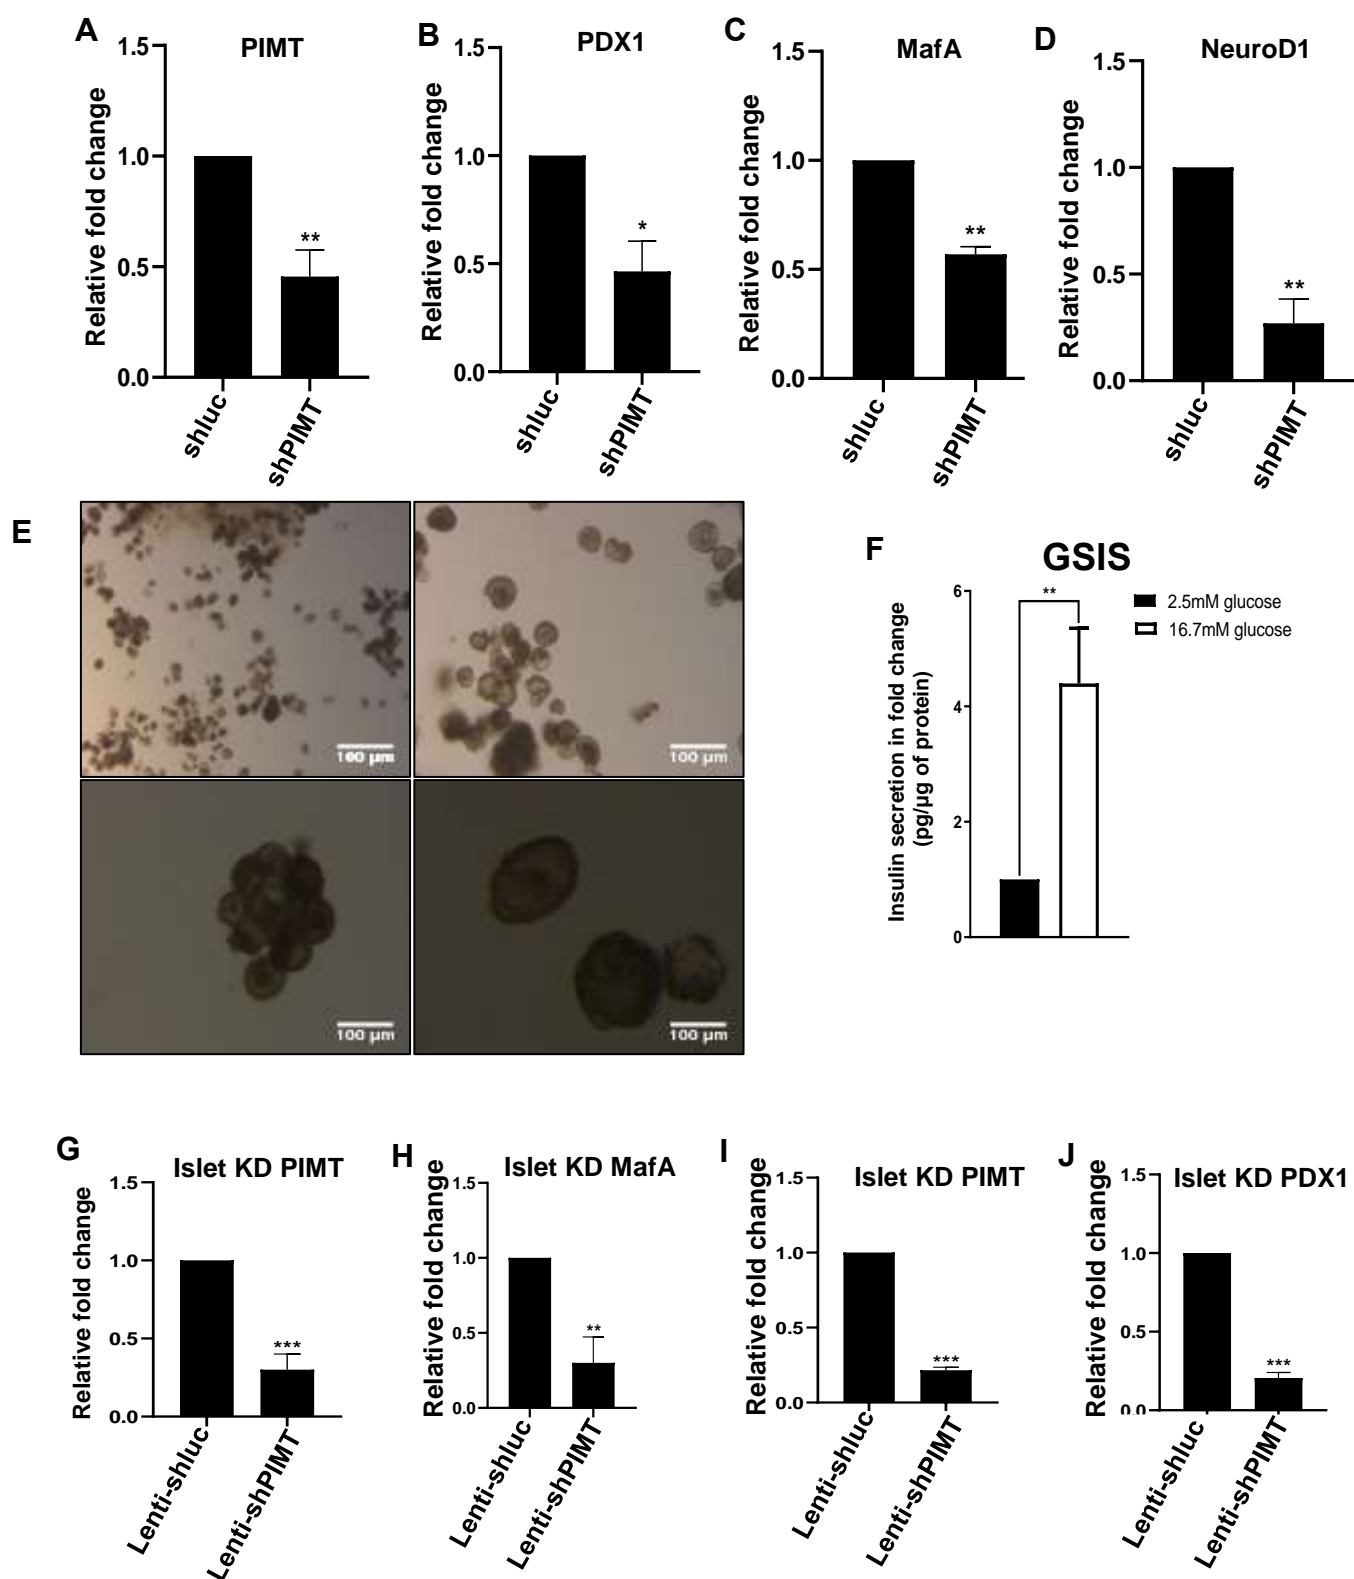

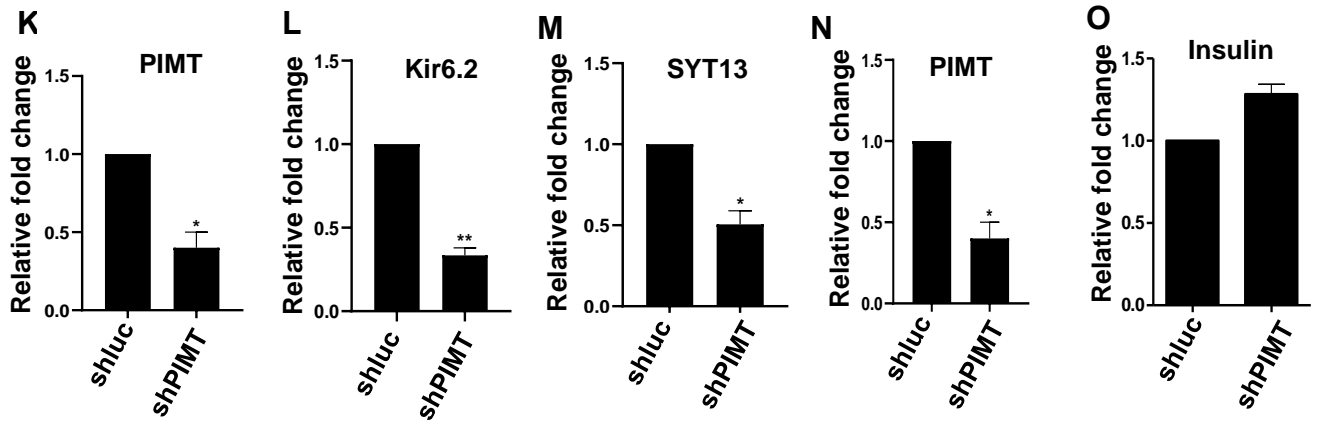

**Figure S2. PIMT regulates Ins1 and Ins2 expression.** A-D) Densitometric quantification of western blots shown in Figure 3G (A-C) and 3H (D). E, F) Microscopic images of isolated rat pancreatic islets using collagenase D (scale bar represents 100 $\mu$ M) and the associated glucose-stimulated insulin secretion analysis (F). G-M) Densitometric analysis of western blots shown in Figure 3I (G, H), 3J (I, J) and 3X (K-M). N-O) Densitometric analysis of western blots shown in Figure 3Z. Data are a representative of three independent experiments. Numerical data are shown as mean  $\pm$  SD. Statistical analysis was performed using Student's t-test. A  $p < 0.05$ ; \*\*,  $p < 0.01$ ; \*\*\*,  $p < 0.001$  value was considered statistically significant.

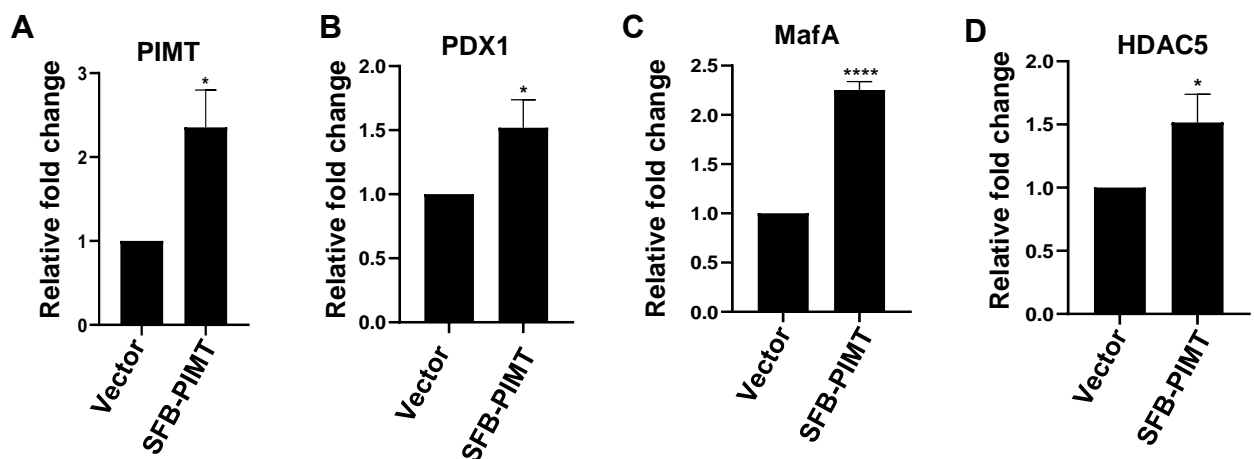

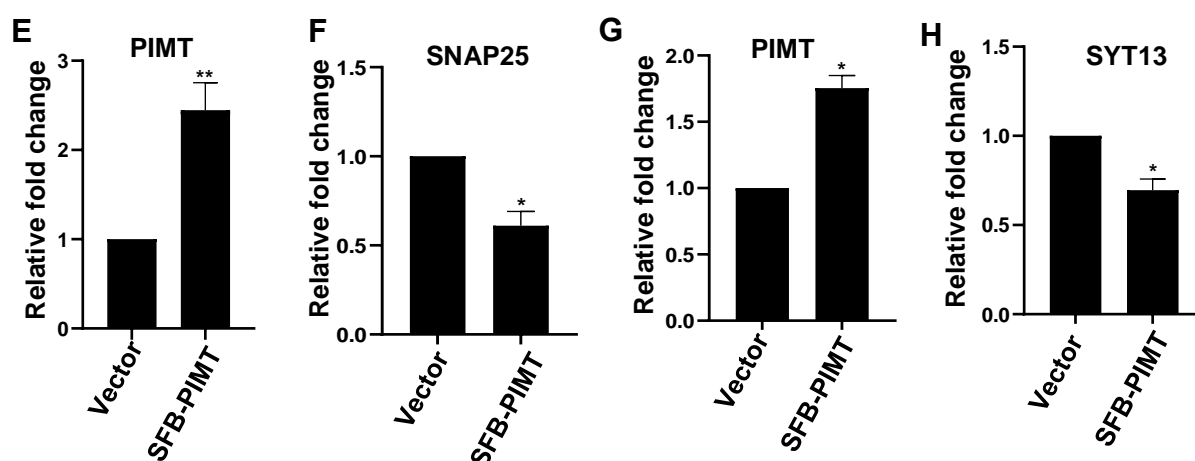

**Figure S3. PIMT overexpression decreased the expression of key insulin secretory pathway genes.** A-H) Densitometry quantification of western blots shown in Figure 6C (A-D), 6O (E,F) and 6P (G,H). Data are a representative of three independent experiments. Numerical data are shown as mean  $\pm$  SD. Statistical analysis was performed using Student's t-test. A  $p < 0.05$ ; \*\*,  $p < 0.01$ ; \*\*\*\*,  $p < 0.0001$  value was considered statistically significant.

#### **Supplementary Table S1 (set 1 differentially expressed genes)**

| Ensemble ID        | Gene name      | p-value     | log2FoldChange |
|--------------------|----------------|-------------|----------------|
| ENSRNOG00000032699 | Ttyh1          | 5.72682E-13 | -1.665815526   |
| ENSRNOG00000013330 | Cdhr1          | 3.69444E-10 | -0.980302709   |
| ENSRNOG00000013564 | Dok3           | 7.72787E-09 | 1.559647195    |
| ENSRNOG00000005382 | AABR07058423.1 | 1.96327E-08 | 3.678105511    |
| ENSRNOG00000019685 | Gdpd3          | 2.53408E-08 | 1.987673154    |
| ENSRNOG00000012181 | Lpl            | 4.70891E-08 | -2.420951877   |
| ENSRNOG00000027574 | AABR07053879.1 | 1.34113E-07 | 1.319236566    |
| ENSRNOG00000015421 | Slc27a3        | 3.74955E-07 | 1.273897381    |
| ENSRNOG00000026953 | Gpr88          | 5.40818E-07 | -1.05560244    |
| ENSRNOG00000019422 | Egr1           | 5.96187E-07 | 1.19209089     |
| ENSRNOG00000004405 | Pigr           | 1.45946E-06 | -2.842641477   |
| ENSRNOG00000011821 | S100a4         | 3.15065E-06 | 1.836005578    |
| ENSRNOG00000024470 | Lman1          | 4.68397E-06 | -0.784516959   |
| ENSRNOG00000029260 | Pitpm2         | 5.17287E-06 | -0.885400796   |
| ENSRNOG00000032609 | #N/A           | 6.24128E-06 | 1.929050009    |
| ENSRNOG00000005498 | Gcg            | 6.88895E-06 | -2.597144206   |

|                    |                |             |              |
|--------------------|----------------|-------------|--------------|
| ENSRNOG00000011517 | Tnfrsf21       | 7.07569E-06 | -1.497306792 |
| ENSRNOG00000015825 | Aurkc          | 9.47103E-06 | 0.980901161  |
| ENSRNOG00000018029 | Doc2g          | 9.64766E-06 | 0.955862002  |
| ENSRNOG00000015860 | Gipr           | 1.04376E-05 | 1.076596745  |
| ENSRNOG00000002579 | Parm1          | 1.39E-05    | -0.856834044 |
| ENSRNOG00000017206 | Igfbp5         | 1.45529E-05 | -1.150465478 |
| ENSRNOG00000000500 | Scube3         | 2.70983E-05 | 1.395204264  |
| ENSRNOG00000060525 | AABR07007717.3 | 2.80904E-05 | -1.411416715 |
| ENSRNOG00000008431 | Gabbr2         | 2.99261E-05 | -1.265404168 |
| ENSRNOG00000032539 | Spag8          | 3.26078E-05 | 1.279282439  |
| ENSRNOG00000021602 | Zmynd10        | 3.32921E-05 | 1.303475006  |
| ENSRNOG00000043098 | Mt2A           | 3.98829E-05 | -2.479542342 |
| ENSRNOG00000060063 | Naa10          | 4.29984E-05 | 1.131488948  |
| ENSRNOG00000050647 | Hspa1b         | 6.34434E-05 | -3.842803002 |
| ENSRNOG00000034174 | Bpifb4         | 6.76595E-05 | 1.113476607  |
| ENSRNOG00000020957 | Igflr1         | 6.86037E-05 | 1.358737115  |
| ENSRNOG00000009967 | Otof           | 7.96405E-05 | 1.075890772  |
| ENSRNOG00000004273 | Ifitm1         | 8.15392E-05 | -1.449779336 |
| ENSRNOG00000033262 | Reep6          | 8.34184E-05 | -0.890632849 |
| ENSRNOG00000012237 | Rdx            | 0.000103823 | -0.911972654 |
| ENSRNOG00000015696 | Cdk5rap1       | 0.00010936  | -0.995612473 |
| ENSRNOG00000006646 | Vopp1          | 0.000118338 | -0.76788694  |
| ENSRNOG00000014740 | Gast           | 0.000126613 | 1.263111806  |
| ENSRNOG00000033280 | Pam            | 0.0001268   | -0.754464837 |
| ENSRNOG00000007044 | L3mbtl1        | 0.0002192   | 1.444371326  |
| ENSRNOG00000010938 | Slc7a10        | 0.000301039 | 1.250846611  |
| ENSRNOG00000029598 | Robo2          | 0.000337949 | -1.014697227 |
| ENSRNOG00000047295 | Prr22          | 0.000362729 | 0.99428091   |
| ENSRNOG00000031333 | #N/A           | 0.000380325 | 2.125939876  |
| ENSRNOG00000042352 | Dnase1l2       | 0.000444985 | 1.459025858  |
| ENSRNOG00000003524 | Lrrc59         | 0.000452949 | -0.789308062 |
| ENSRNOG00000054259 | Klf11          | 0.000465331 | -0.878277209 |
| ENSRNOG00000020792 | Etv4           | 0.000466234 | 1.258601975  |
| ENSRNOG00000006280 | Pcsk9          | 0.000479466 | -1.551296633 |
| ENSRNOG00000011526 | Pcsk6          | 0.000488874 | -1.008510604 |
| ENSRNOG00000016216 | Sft2d3         | 0.00049404  | -0.863054404 |
| ENSRNOG00000014795 | Nr2f1          | 0.000506339 | 0.872851957  |
| ENSRNOG00000058545 | Arhgap4        | 0.000519885 | 0.899846728  |
| ENSRNOG00000048172 | Rac3           | 0.000544318 | 1.16916431   |
| ENSRNOG00000046190 | AC112062.1     | 0.000563085 | 2.693433381  |
| ENSRNOG00000019830 | Hsd17b1        | 0.000594279 | 0.839998069  |
| ENSRNOG00000016244 | Mical2         | 0.000598929 | -0.757054585 |
| ENSRNOG00000031915 | Hdac10         | 0.000645102 | 0.834314548  |
| ENSRNOG00000015085 | Dmpk           | 0.000690341 | 0.829273814  |

|                    |              |             |              |
|--------------------|--------------|-------------|--------------|
| ENSRNOG00000020148 | Il4i1        | 0.000702059 | 0.947582135  |
| ENSRNOG00000031852 | Lsamp        | 0.000746342 | 1.378997119  |
| ENSRNOG00000000439 | Ager         | 0.000761431 | 1.224004455  |
| ENSRNOG00000049077 | Mir5125      | 0.00077681  | 1.037587775  |
| ENSRNOG00000014215 | Klf9         | 0.000834957 | -1.077913625 |
| ENSRNOG00000017914 | Cavin3       | 0.00083682  | -0.995996858 |
| ENSRNOG00000018784 | Jph3         | 0.000857404 | -0.805349358 |
| ENSRNOG00000000443 | LOC103689965 | 0.000869946 | 1.495974771  |
| ENSRNOG00000020342 | Samd11       | 0.000902297 | 1.078784025  |
| ENSRNOG00000025764 | AC128848.1   | 0.000904035 | -1.524240171 |
| ENSRNOG00000021017 | Ca11         | 0.000982514 | 0.806373667  |
| ENSRNOG00000009514 | Mme          | 0.000999543 | -0.925979767 |
| ENSRNOG00000017307 | Prss23       | 0.001048088 | -0.761426549 |
| ENSRNOG00000008199 | Odf3l2       | 0.001108107 | 1.234966713  |
| ENSRNOG00000012757 | Nek3         | 0.001140477 | 0.826211378  |
| ENSRNOG00000060332 | 7SK          | 0.001181323 | 2.061395166  |
| ENSRNOG00000018305 | St8sia3      | 0.001183173 | -0.869221123 |
| ENSRNOG00000017045 | Zdhhc1       | 0.001283508 | 0.986597844  |
| ENSRNOG00000061908 | 7SK          | 0.001289834 | 2.90293685   |
| ENSRNOG00000056643 | Cdh8         | 0.001320817 | 0.910437516  |
| ENSRNOG00000017899 | Akr7a3       | 0.001413793 | 1.246854485  |
| ENSRNOG00000038047 | Mt1          | 0.001419188 | -1.583652593 |
| ENSRNOG00000040287 | Cyp1b1       | 0.001502867 | -1.496795525 |
| ENSRNOG00000042601 | Zglp1        | 0.001536011 | 1.40459739   |
| ENSRNOG00000005413 | Creb3l1      | 0.001653421 | -0.861031945 |
| ENSRNOG00000007077 | Fem1b        | 0.001684731 | -1.008261587 |
| ENSRNOG00000018371 | Tubb6        | 0.001742279 | -0.799987499 |
| ENSRNOG00000029465 | Slc26a10     | 0.001758105 | 1.081116919  |
| ENSRNOG00000018285 | Kcna2        | 0.001771376 | -0.766744146 |
| ENSRNOG00000021016 | Ntn5         | 0.001877823 | 1.196649825  |
| ENSRNOG00000022844 | Pdzn4        | 0.001883244 | -1.133740971 |
| ENSRNOG00000025695 | Tns3         | 0.001958362 | -0.944013182 |
| ENSRNOG00000006649 | Thrb         | 0.002105953 | -0.909423681 |
| ENSRNOG00000037695 | Sgpp2        | 0.002241219 | -1.223311317 |
| ENSRNOG00000061316 | Ubp1         | 0.002262593 | -1.007486963 |
| ENSRNOG00000053055 | Otop3        | 0.002580042 | -1.432770548 |
| ENSRNOG00000043388 | Irf3         | 0.002582309 | 0.851251797  |
| ENSRNOG00000002950 | Lyl1         | 0.00264858  | 0.955989736  |
| ENSRNOG00000011411 | Adgrg6       | 0.002711411 | -1.412954812 |
| ENSRNOG00000040205 | Zcchc24      | 0.002730806 | -1.347277562 |
| ENSRNOG00000014297 | Sdc4         | 0.002762165 | -0.919432175 |
| ENSRNOG00000047040 | Lhb          | 0.002840011 | 0.859373781  |
| ENSRNOG00000053909 | 7SK          | 0.002887878 | 2.25378016   |
| ENSRNOG00000019662 | Tm6sf1       | 0.00311086  | -0.963011854 |

|                    |                |             |              |
|--------------------|----------------|-------------|--------------|
| ENSRNOG00000017558 | Tubb2a         | 0.003141438 | -0.801929278 |
| ENSRNOG00000015655 | Ptgfrn         | 0.003239781 | -0.741236568 |
| ENSRNOG00000048230 | LOC300308      | 0.003327132 | 0.872788836  |
| ENSRNOG00000013658 | Nefl           | 0.003466978 | -0.975774126 |
| ENSRNOG00000022505 | Slc17a4        | 0.003491891 | 1.349432715  |
| ENSRNOG00000003233 | Serpinf2       | 0.003542785 | 1.083973863  |
| ENSRNOG00000019065 | Zfp385b        | 0.003621773 | -1.074366731 |
| ENSRNOG00000007445 | Asph           | 0.003907965 | -0.930319672 |
| ENSRNOG00000043071 | Linc00176      | 0.003929552 | 1.254554039  |
| ENSRNOG00000019692 | Metrn          | 0.004091536 | 1.814718356  |
| ENSRNOG00000056565 | AABR07059002.1 | 0.004110428 | 1.452207612  |
| ENSRNOG00000025121 | Pla2g3         | 0.004261341 | 0.808283613  |
| ENSRNOG00000017508 | Kmt5c          | 0.004527058 | 0.774661535  |
| ENSRNOG00000011775 | Mfap3l         | 0.004561431 | -0.774118993 |
| ENSRNOG00000017260 | Cdr2           | 0.00461895  | -0.880060429 |
| ENSRNOG00000014232 | P2ry1          | 0.004665784 | -1.275298377 |
| ENSRNOG00000056150 | Purb           | 0.004694353 | -0.805040659 |
| ENSRNOG00000021689 | Rps6kb2        | 0.004758589 | 0.783965029  |
| ENSRNOG00000015541 | Gnb3           | 0.004767901 | 0.871612707  |
| ENSRNOG00000017117 | Ybx2           | 0.004771149 | 0.870946687  |
| ENSRNOG00000050860 | Abcb11         | 0.004958455 | 1.303456902  |
| ENSRNOG00000060123 | Kifc2          | 0.005029679 | 1.046935974  |
| ENSRNOG00000020505 | Map4k1         | 0.005100664 | 0.770227061  |
| ENSRNOG00000022699 | AABR07030039.1 | 0.005189248 | 0.785547546  |
| ENSRNOG00000049983 | Shd            | 0.005313984 | 1.266220921  |
| ENSRNOG00000013565 | Zfp507         | 0.005542389 | -1.026757687 |
| ENSRNOG00000028744 | Mtnr1a         | 0.005666454 | -1.125985277 |
| ENSRNOG00000009951 | Aif1l          | 0.00574004  | -0.814016523 |
| ENSRNOG00000008626 | Manea          | 0.005752139 | -0.815563874 |
| ENSRNOG00000055853 | Gorasp2        | 0.005877558 | -0.954877066 |
| ENSRNOG00000001324 | Asmt           | 0.005900009 | 0.951784089  |
| ENSRNOG00000009103 | Chrac1         | 0.005957186 | -0.843880331 |
| ENSRNOG00000013823 | Cers3          | 0.006038291 | -1.004310208 |
| ENSRNOG00000013465 | Tepp           | 0.00623285  | 1.101334338  |
| ENSRNOG00000043311 | Birc7          | 0.006244001 | 0.861120515  |
| ENSRNOG00000028699 | Sco1           | 0.006377486 | -0.900580656 |
| ENSRNOG00000004660 | Fzd6           | 0.006455381 | -0.899168981 |
| ENSRNOG00000028235 | RGD1560795     | 0.006458614 | 1.540650607  |
| ENSRNOG00000004749 | Slc30a1        | 0.00661486  | -0.820999386 |
| ENSRNOG00000021048 | AC095693.1     | 0.006648502 | 1.236474638  |
| ENSRNOG00000018715 | Clec10a        | 0.006706208 | -1.726834031 |
| ENSRNOG00000025074 | Fgg            | 0.00689073  | -0.862324915 |
| ENSRNOG00000015667 | Epcam          | 0.006910679 | -0.752977508 |
| ENSRNOG00000010694 | Tpbg           | 0.006929486 | -0.89154727  |

|                     |                |             |              |
|---------------------|----------------|-------------|--------------|
| ENSRNOG00000029778  | Maob           | 0.007003647 | -1.348820976 |
| ENSRNOG00000003215  | Zfp287         | 0.007158593 | -0.813154041 |
| ENSRNOG000000021714 | Fam92b         | 0.007209091 | 1.100667495  |
| ENSRNOG00000007151  | Cdk14          | 0.007209524 | -0.818427414 |
| ENSRNOG00000018943  | Tnnc1          | 0.007532678 | 0.833959506  |
| ENSRNOG00000008843  | Eci1           | 0.00768787  | 1.215052624  |
| ENSRNOG00000010775  | Arrdc4         | 0.008067884 | -1.075220043 |
| ENSRNOG00000047244  | Nup214         | 0.008299735 | -0.819430967 |
| ENSRNOG00000020380  | Lgals7         | 0.008459891 | 1.494564645  |
| ENSRNOG00000016987  | Pstpip2        | 0.008609826 | -1.112894579 |
| ENSRNOG00000005515  | Rhbdl3         | 0.008891585 | -0.766633675 |
| ENSRNOG00000001711  | Plaat1         | 0.009058187 | -0.814969649 |
| ENSRNOG00000007092  | Fgb            | 0.009182422 | -0.762514616 |
| ENSRNOG00000009336  | Mapk15         | 0.009420235 | 0.901740392  |
| ENSRNOG00000010438  | Cpt1b          | 0.009453324 | 0.788077525  |
| ENSRNOG00000020770  | Arl4d          | 0.009787533 | 0.944486246  |
| ENSRNOG00000016526  | Dsg2           | 0.009862964 | -0.771193443 |
| ENSRNOG00000047113  | Spsb2          | 0.009956407 | 1.420680781  |
| ENSRNOG00000006619  | Dnajc9         | 0.00996089  | -0.816108149 |
| ENSRNOG00000003291  | Creg1          | 0.01000572  | -0.934020685 |
| ENSRNOG00000008703  | Rnps1          | 0.010237496 | -0.904606385 |
| ENSRNOG000000058604 | AABR07012581.1 | 0.010274069 | 1.532210377  |
| ENSRNOG00000011280  | Mllt3          | 0.010318871 | -0.833106469 |
| ENSRNOG00000011964  | Abcd4          | 0.010495538 | 0.799060304  |
| ENSRNOG00000001785  | Etv5           | 0.010510706 | 0.765578625  |
| ENSRNOG00000047250  | Gmfb           | 0.010588806 | -0.79686872  |
| ENSRNOG000000054542 | #N/A           | 0.01068736  | 1.610597104  |
| ENSRNOG000000032261 | Cyp2d4         | 0.010862704 | 0.973654746  |
| ENSRNOG00000000480  | Phf1           | 0.011041712 | 0.831154883  |
| ENSRNOG00000007489  | Zfp41          | 0.011551213 | -0.779876498 |
| ENSRNOG000000059319 | AABR07028013.1 | 0.0115682   | 1.077746517  |
| ENSRNOG00000001520  | Dlx1           | 0.011639922 | -1.099193751 |
| ENSRNOG00000043419  | Hist3h2ba      | 0.011647808 | 0.801983246  |
| ENSRNOG00000017893  | Baiap3         | 0.011796892 | 1.679267223  |
| ENSRNOG00000048186  | F2rl3          | 0.011874458 | 1.03960159   |
| ENSRNOG00000015075  | Stc1           | 0.011930406 | -1.3175173   |
| ENSRNOG000000059962 | AABR07025787.1 | 0.011950088 | -1.106317163 |
| ENSRNOG00000008482  | Rbms1          | 0.0119759   | -0.880606307 |
| ENSRNOG00000003887  | Lgi2           | 0.011997171 | -0.869841678 |
| ENSRNOG000000058260 | Gpbar1         | 0.0121066   | 1.411862662  |
| ENSRNOG00000003841  | Kcnh1          | 0.012262876 | -1.141695906 |
| ENSRNOG000000053306 | Washc1         | 0.012317274 | 0.801080856  |
| ENSRNOG00000047401  | Gfy            | 0.01233678  | 0.910665245  |
| ENSRNOG00000010077  | Smarcd3        | 0.01238971  | 0.816341179  |



|                    |                |             |              |
|--------------------|----------------|-------------|--------------|
| ENSRNOG00000022796 | Fgfbp3         | 0.012770244 | -0.809911719 |
| ENSRNOG00000053946 | AC120807.1     | 0.012893492 | 1.135424667  |
| ENSRNOG00000019771 | Tbx6           | 0.013200117 | 1.220248755  |
| ENSRNOG00000016214 | Agl            | 0.013202361 | -0.952232248 |
| ENSRNOG00000028658 | Olig2          | 0.013321827 | -0.940304815 |
| ENSRNOG00000050817 | AABR07065113.1 | 0.013445947 | 0.805459543  |
| ENSRNOG00000002292 | Hnrnpd         | 0.013466724 | -0.857978194 |
| ENSRNOG00000013552 | Scd            | 0.013622047 | 1.017168634  |
| ENSRNOG00000025998 | AABR07045485.1 | 0.013685666 | 0.936593531  |
| ENSRNOG00000017220 | Tcirg1         | 0.013820002 | 0.834726157  |
| ENSRNOG00000016388 | Sphkap         | 0.014039271 | -1.132647411 |
| ENSRNOG00000005917 | Pawr           | 0.014266581 | -0.787431239 |
| ENSRNOG00000003840 | Slit2          | 0.014407154 | 0.805273914  |
| ENSRNOG00000004753 | Napb           | 0.014483228 | -1.435272513 |
| ENSRNOG00000054978 | H1f2           | 0.014588979 | 1.064157888  |
| ENSRNOG00000060594 | LOC100911672   | 0.014685036 | 0.920989084  |
| ENSRNOG00000003127 | Spryd4         | 0.014821093 | -0.788853781 |
| ENSRNOG00000014288 | #N/A           | 0.015170915 | -0.828933119 |
| ENSRNOG00000042237 | Tm6sf2         | 0.015172243 | 1.134883478  |
| ENSRNOG00000009354 | Nrarp          | 0.015633336 | -0.84268071  |
| ENSRNOG00000002642 | Ptges3         | 0.015938206 | -1.312310571 |
| ENSRNOG00000010169 | Atpaf1         | 0.015991115 | -0.863203665 |
| ENSRNOG00000014142 | Ogfrl1         | 0.016261722 | -1.059120592 |
| ENSRNOG00000037225 | Tyms           | 0.016271835 | -0.785430161 |
| ENSRNOG00000001053 | Tmed2          | 0.016444109 | -0.946286369 |
| ENSRNOG00000016137 | Rad23b         | 0.016741027 | -0.783360472 |
| ENSRNOG00000005615 | Gadd45a        | 0.016873374 | -0.763593476 |
| ENSRNOG00000054322 | #N/A           | 0.016990544 | -2.350989015 |
| ENSRNOG00000019723 | LOC100910990   | 0.017095225 | -1.045240532 |
| ENSRNOG00000016273 | Fam136a        | 0.017148103 | -0.778187961 |
| ENSRNOG00000009460 | Pdzd8          | 0.017151835 | -0.74969357  |
| ENSRNOG00000027341 | Tenm2          | 0.017247523 | -0.841356936 |
| ENSRNOG00000036667 | Hexd           | 0.01737997  | 0.80395862   |
| ENSRNOG00000006526 | Sema3c         | 0.017485941 | -1.133599102 |
| ENSRNOG00000012502 | Stk17b         | 0.017568581 | -1.292001339 |
| ENSRNOG00000062276 | AABR07044631.2 | 0.01764689  | 1.577750946  |
| ENSRNOG00000012215 | Baiap2l2       | 0.018030221 | 1.088812413  |
| ENSRNOG00000050414 | AABR07006333.1 | 0.018141142 | -1.170545553 |
| ENSRNOG00000021155 | Ctsk           | 0.018248826 | 1.253282902  |
| ENSRNOG00000032254 | Sin3a          | 0.018292897 | -0.896978904 |
| ENSRNOG00000022273 | Rfk            | 0.018305094 | -0.817183986 |
| ENSRNOG00000049708 | Wdr62          | 0.018422188 | 1.029592415  |
| ENSRNOG00000010911 | Tmem108        | 0.018499444 | 1.05334798   |
| ENSRNOG00000010076 | Pkp1           | 0.018651122 | -0.933080498 |

|                     |                |             |              |
|---------------------|----------------|-------------|--------------|
| ENSRNOG00000059903  | Thbs3          | 0.01873886  | 0.945524232  |
| ENSRNOG00000059714  | Hsp90aa1       | 0.018868554 | -0.87047932  |
| ENSRNOG00000023433  | Gata6          | 0.019197104 | 0.769714647  |
| ENSRNOG00000013589  | Cxcl12         | 0.019342552 | 0.949908829  |
| ENSRNOG00000015701  | Rreb1          | 0.019877243 | -0.737978523 |
| ENSRNOG00000012176  | Rab27b         | 0.019881013 | -0.931812884 |
| ENSRNOG00000019240  | Ampd2          | 0.020269504 | 0.964460732  |
| ENSRNOG00000010947  | Mmp14          | 0.020428901 | -0.802427043 |
| ENSRNOG00000017409  | Wnt6           | 0.021020207 | -1.442732093 |
| ENSRNOG00000009528  | Sdcbp2         | 0.021101166 | 1.081348048  |
| ENSRNOG00000003908  | Cep128         | 0.021209301 | -0.797151365 |
| ENSRNOG000000053143 | AC119007.3     | 0.021356967 | 1.604624261  |
| ENSRNOG00000012862  | Spsb4          | 0.022257061 | -0.780308778 |
| ENSRNOG000000056247 | #N/A           | 0.022258826 | 1.932393568  |
| ENSRNOG00000013239  | Tle4           | 0.022825447 | -0.86467298  |
| ENSRNOG000000055292 | LOC679087      | 0.023216225 | 1.044823666  |
| ENSRNOG00000020990  | Fgf21          | 0.023241336 | 1.262423884  |
| ENSRNOG00000016921  | Klhl11         | 0.02352806  | -0.771152647 |
| ENSRNOG00000002810  | Gfpt2          | 0.0239984   | -0.829843453 |
| ENSRNOG00000013057  | Prc1           | 0.024040185 | -0.875289995 |
| ENSRNOG00000017900  | rnf141         | 0.024209202 | -0.978277868 |
| ENSRNOG00000010584  | Tmem123        | 0.024238863 | -0.903334578 |
| ENSRNOG00000005144  | Tmem18         | 0.024330247 | -0.798953736 |
| ENSRNOG00000025644  | LOC499331      | 0.024382378 | -1.164469071 |
| ENSRNOG00000017477  | Mmp23          | 0.024393831 | 1.318647241  |
| ENSRNOG000000053787 | Mdfic          | 0.024400772 | -1.049403162 |
| ENSRNOG00000015068  | Il11ra1        | 0.024429205 | 0.985534359  |
| ENSRNOG000000059487 | AABR07045405.1 | 0.024574525 | -0.96395107  |
| ENSRNOG000000046144 | H3c1           | 0.024675628 | 1.068414355  |
| ENSRNOG00000021318  | Epas1          | 0.024722718 | -0.739061119 |
| ENSRNOG00000011560  | Mtmr9          | 0.024845813 | -0.747531568 |
| ENSRNOG00000008526  | Pdzd3          | 0.025030552 | 0.824988566  |
| ENSRNOG00000026169  | RGD1560146     | 0.025336592 | 1.665818093  |
| ENSRNOG00000011987  | Cd2ap          | 0.025446238 | -0.927075705 |
| ENSRNOG00000014183  | Gnaq           | 0.025456311 | -0.807657256 |
| ENSRNOG000000061851 | Foxj3          | 0.026095904 | -1.05265835  |
| ENSRNOG00000016309  | Rgp1           | 0.026479094 | -0.749178807 |
| ENSRNOG00000023257  | Adamts9        | 0.026695016 | -0.822146174 |
| ENSRNOG00000007374  | Tac1           | 0.026936723 | -1.239284877 |
| ENSRNOG00000015615  | Tnfrsf11a      | 0.026979677 | -1.399128824 |
| ENSRNOG00000006076  | Steap2         | 0.0272796   | -0.936025371 |
| ENSRNOG00000016336  | AABR07045373.1 | 0.027309559 | 0.961800932  |
| ENSRNOG00000011794  | Tcea3          | 0.027384816 | 1.098703134  |
| ENSRNOG00000011854  | Dennd11        | 0.027440696 | -1.075538212 |

|                    |                |             |              |
|--------------------|----------------|-------------|--------------|
| ENSRNOG00000000474 | Rgl2           | 0.02766439  | 0.804371851  |
| ENSRNOG00000018387 | Wdr7           | 0.028263706 | -0.861610933 |
| ENSRNOG00000004791 | Arf6           | 0.028534308 | -0.778878529 |
| ENSRNOG00000019128 | St8sia4        | 0.028630128 | -0.815337316 |
| ENSRNOG00000057527 | RNase_MRP      | 0.028700125 | 1.312966233  |
| ENSRNOG00000003960 | Cltrn          | 0.028800114 | 0.990010866  |
| ENSRNOG00000019729 | Jmjd8          | 0.028977976 | 0.910319898  |
| ENSRNOG00000006395 | #N/A           | 0.029233569 | 1.213539802  |
| ENSRNOG00000008857 | Adamts10       | 0.029270225 | 0.766136335  |
| ENSRNOG00000017106 | Csnk1a1        | 0.029382239 | -0.78039335  |
| ENSRNOG00000006148 | RGD1310352     | 0.029383087 | -0.893438665 |
| ENSRNOG00000045646 | LOC102549173   | 0.029466046 | 0.882905452  |
| ENSRNOG00000027630 | Casc1          | 0.02948609  | 0.774436717  |
| ENSRNOG00000019096 | Hsd17b3        | 0.030181145 | -1.420687018 |
| ENSRNOG00000043103 | Frrs1l         | 0.030218506 | -0.956380852 |
| ENSRNOG00000032739 | Da2-19         | 0.030229896 | 1.157631706  |
| ENSRNOG00000018176 | Rab6a          | 0.030454996 | -0.883601889 |
| ENSRNOG00000014613 | Ddah1          | 0.030531954 | -0.914494897 |
| ENSRNOG00000029903 | Spock3         | 0.030912891 | 0.833712057  |
| ENSRNOG00000001510 | AC120066.1     | 0.03093814  | 1.368724264  |
| ENSRNOG00000010131 | Rin2           | 0.031509177 | -0.970615747 |
| ENSRNOG00000046621 | AABR07043748.1 | 0.031546778 | -0.738711741 |
| ENSRNOG00000046971 | Ccer2          | 0.031627075 | 1.342721642  |
| ENSRNOG00000009570 | Pdxdp          | 0.031665741 | 0.993377711  |
| ENSRNOG00000000825 | Calhm5         | 0.031721469 | -0.87453675  |
| ENSRNOG00000056193 | AC108572.3     | 0.032047981 | 1.094631202  |
| ENSRNOG00000055471 | Ywhah          | 0.032057521 | -0.978856232 |
| ENSRNOG00000033411 | Usp12          | 0.03211745  | -0.737759823 |
| ENSRNOG00000004104 | Zkscan7        | 0.032388096 | -0.765303931 |
| ENSRNOG00000020460 | #N/A           | 0.032450973 | -0.834520185 |
| ENSRNOG00000060141 | Epdr1          | 0.032684936 | -0.78207058  |
| ENSRNOG00000014092 | Paip2b         | 0.032766189 | -1.253875684 |
| ENSRNOG00000031790 | H2bu1          | 0.032905605 | 1.152298799  |
| ENSRNOG00000057556 | Pdzn3          | 0.032922949 | -0.754247103 |
| ENSRNOG00000036711 | Spn            | 0.033233311 | -0.787414526 |
| ENSRNOG00000049056 | AABR07051450.1 | 0.033364071 | 0.792646985  |
| ENSRNOG00000036839 | Hnrnpa1        | 0.033536047 | -0.772923478 |
| ENSRNOG00000013764 | Fam118a        | 0.033584564 | -0.805464731 |
| ENSRNOG00000058484 | Anp32a         | 0.033707806 | -0.791492125 |
| ENSRNOG00000023733 | RGD1560821     | 0.033759352 | 0.816347664  |
| ENSRNOG00000004730 | Meis2          | 0.034029913 | -0.935563067 |
| ENSRNOG00000036918 | Etfbkm1        | 0.034145751 | -1.169990221 |
| ENSRNOG00000053850 | Rdh5           | 0.034270318 | 1.084117708  |
| ENSRNOG00000021170 | Plekho1        | 0.034493614 | 0.901822417  |

|                     |                |             |              |
|---------------------|----------------|-------------|--------------|
| ENSRNOG00000016621  | Actl7b         | 0.034610233 | 1.104218578  |
| ENSRNOG00000009381  | Mapk6          | 0.034682413 | -0.928941417 |
| ENSRNOG000000042753 | Fgf13          | 0.034903753 | -1.180590867 |
| ENSRNOG000000050214 | Amt            | 0.035159628 | 1.090750673  |
| ENSRNOG000000018478 | Myo3a          | 0.035234437 | 0.912050183  |
| ENSRNOG000000024363 | Sertad1        | 0.035261707 | 0.81638037   |
| ENSRNOG000000008364 | Cat            | 0.035764169 | -1.13906523  |
| ENSRNOG000000061925 | AABR07059159.1 | 0.035871597 | -1.172663747 |
| ENSRNOG000000032224 | RGD1562378     | 0.035931175 | 1.283637524  |
| ENSRNOG000000052051 | Slc24a1        | 0.036091091 | -1.234859696 |
| ENSRNOG000000046794 | Khdrbs1        | 0.036927125 | -0.844176226 |
| ENSRNOG000000016330 | Rbm12b         | 0.036976316 | 1.326877185  |
| ENSRNOG000000028422 | Rmnd5a         | 0.037112439 | -1.070339426 |
| ENSRNOG000000009175 | Jagn1          | 0.037256896 | -0.79764181  |
| ENSRNOG000000007088 | Xpot           | 0.037292575 | -0.836623327 |
| ENSRNOG000000001890 | Txnrd2         | 0.037642106 | 0.778956368  |
| ENSRNOG000000016459 | Eif3j          | 0.037794665 | -1.01618198  |
| ENSRNOG000000033912 | Fcho1          | 0.037797874 | 0.855199613  |
| ENSRNOG000000057966 | Smim31         | 0.037856531 | -0.943191055 |
| ENSRNOG000000045749 | AC105515.1     | 0.038135595 | 1.145945602  |
| ENSRNOG000000007755 | Pm20d2         | 0.038314409 | -1.407408487 |
| ENSRNOG000000004284 | Btg1           | 0.038618367 | -0.969447078 |
| ENSRNOG000000031669 | Lpp            | 0.03878304  | 1.172180261  |
| ENSRNOG000000016260 | Polr3g         | 0.03976816  | -0.868864926 |
| ENSRNOG000000012311 | Slc35d3        | 0.03985226  | -0.837881014 |
| ENSRNOG000000003400 | Fmo4           | 0.039893734 | -1.17677829  |
| ENSRNOG000000043233 | Cyp4f6         | 0.040041982 | -1.00135535  |
| ENSRNOG000000004292 | Sptssa         | 0.040061473 | -0.854970254 |
| ENSRNOG000000014647 | Cbfb           | 0.040267867 | -1.254662974 |
| ENSRNOG000000034228 | Pik3c2g        | 0.04061542  | -1.29574534  |
| ENSRNOG000000060349 | Fam3c          | 0.041734892 | -0.771516035 |
| ENSRNOG000000053679 | AABR07060862.1 | 0.042364949 | -1.450376056 |
| ENSRNOG000000020106 | Tnfrsf4        | 0.042391949 | 1.054680588  |
| ENSRNOG000000001431 | Rasa4          | 0.042636996 | 0.983808446  |
| ENSRNOG000000037647 | Ostm1          | 0.042680605 | -0.778269909 |
| ENSRNOG000000017751 | Arl6ip1        | 0.043130245 | -1.021109732 |
| ENSRNOG000000021263 | Tmem230        | 0.043530979 | -0.817243644 |
| ENSRNOG000000057451 | Itga5          | 0.043577153 | -0.774982472 |
| ENSRNOG000000050289 | Cstf2t         | 0.043778153 | -0.77594947  |
| ENSRNOG000000004874 | Flrt3          | 0.043906517 | -1.128959723 |
| ENSRNOG000000051650 | Ywhaq          | 0.044154126 | -0.846000759 |
| ENSRNOG000000026527 | #N/A           | 0.044283429 | 0.910465701  |
| ENSRNOG000000014964 | Hp             | 0.044452159 | 0.938251719  |
| ENSRNOG000000020389 | Capn12         | 0.044554012 | 1.102292527  |

|                    |                |             |              |
|--------------------|----------------|-------------|--------------|
| ENSRNOG00000033010 | Akr1c12        | 0.044811158 | -1.060850166 |
| ENSRNOG00000055277 | LOC100362333   | 0.044812358 | -0.846530575 |
| ENSRNOG00000011535 | Gcsh           | 0.045694478 | -0.905930204 |
| ENSRNOG00000045698 | Lin7c          | 0.045858604 | -0.810930701 |
| ENSRNOG00000017904 | Nol7           | 0.045977143 | -0.873583697 |
| ENSRNOG00000019959 | Kcnc3          | 0.046134529 | 0.777795415  |
| ENSRNOG00000023320 | #N/A           | 0.046213147 | 0.861002155  |
| ENSRNOG00000042374 | Tgif2          | 0.046404694 | 0.997980084  |
| ENSRNOG00000059572 | Tsen34l1       | 0.046479714 | -1.545335251 |
| ENSRNOG00000011861 | Aadat          | 0.046875879 | -0.90069536  |
| ENSRNOG00000020723 | Pten           | 0.047172096 | -0.810113015 |
| ENSRNOG00000003247 | Sde2           | 0.04745819  | -0.947385754 |
| ENSRNOG00000024595 | Cers6          | 0.047583553 | -0.777002563 |
| ENSRNOG00000024757 | AABR07069219.1 | 0.047634438 | -0.909734103 |
| ENSRNOG00000028576 | AABR07028446.1 | 0.047656054 | 0.888606044  |
| ENSRNOG00000052421 | AABR07012475.2 | 0.047685324 | 0.789626429  |
| ENSRNOG00000013670 | Pax3           | 0.047753483 | -1.421393461 |
| ENSRNOG00000018770 | Pmaip1         | 0.047803184 | -1.081886285 |
| ENSRNOG00000020927 | Tulp2          | 0.048091739 | 1.273362887  |
| ENSRNOG00000047895 | Mettl1         | 0.048285147 | -1.091981749 |
| ENSRNOG00000005285 | Fbxo33         | 0.049665384 | -0.927689394 |
| ENSRNOG00000014899 | AC110824.1     | 0.049921147 | -1.498771364 |

### **Supplementary Table S2 (set 2 differentially expressed genes)**

| Ensemble ID        | Gene name    | p-value     | log2FoldChange |
|--------------------|--------------|-------------|----------------|
| ENSRNOG00000002413 | Gpc4         | 4.18674E-37 | 1.991742964    |
| ENSRNOG00000000825 | Calhm5       | 2.03493E-27 | 3.973986669    |
| ENSRNOG00000037188 | Mug1         | 2.31596E-24 | 4.665979596    |
| ENSRNOG00000045919 | LOC103694120 | 7.28286E-21 | 5.503619366    |
| ENSRNOG00000013092 | Lonrf3       | 4.24698E-20 | 1.062354276    |
| ENSRNOG00000012906 | Bcas1        | 2.98693E-19 | -4.061333043   |
| ENSRNOG00000024763 | LOC685431    | 5.19913E-19 | 1.249990248    |
| ENSRNOG00000057527 | RNase_MRP    | 1.6798E-18  | 2.145288629    |
| ENSRNOG00000018229 | Slc45a1      | 2.19575E-18 | -3.453445388   |
| ENSRNOG00000051483 | LOC103689961 | 1.3678E-17  | 1.467227778    |
| ENSRNOG00000061230 | L1cam        | 1.68977E-17 | -0.93104142    |
| ENSRNOG00000020325 | Calhm2       | 4.57156E-17 | 1.699768133    |
| ENSRNOG00000006069 | Eif2ak3      | 1.4212E-16  | -1.050123237   |

|                    |           |             |              |
|--------------------|-----------|-------------|--------------|
| ENSRNOG00000016541 | Enc1      | 4.04918E-16 | -0.913724251 |
| ENSRNOG00000047401 | Gfy       | 1.85951E-15 | 1.945858973  |
| ENSRNOG00000003769 | Tmem163   | 1.67544E-14 | 1.043779198  |
| ENSRNOG00000008837 | Ass1      | 5.04676E-14 | 0.839209015  |
| ENSRNOG00000043419 | Hist3h2ba | 7.54629E-14 | 1.090622996  |
| ENSRNOG00000017403 | Apobr     | 8.86656E-14 | -2.404044613 |
| ENSRNOG00000013916 | Nefm      | 1.05679E-13 | -1.294533803 |
| ENSRNOG00000015593 | Sigirr    | 2.38785E-13 | 0.875016443  |
| ENSRNOG00000018420 | Slc22a7   | 6.2352E-13  | 1.816007548  |
| ENSRNOG00000014387 | Chac1     | 7.32434E-13 | -1.235760366 |
| ENSRNOG00000000878 | Slc44a4   | 7.36685E-13 | 1.047562435  |
| ENSRNOG00000009031 | Gucy2c    | 3.40896E-12 | 2.379194632  |
| ENSRNOG00000019318 | Syt3      | 1.2883E-11  | 1.262692253  |
| ENSRNOG00000020151 | Cdh1      | 1.37095E-11 | 1.230124167  |
| ENSRNOG00000015860 | Gipr      | 2.09219E-11 | 1.27997949   |
| ENSRNOG00000054259 | Klf11     | 3.02709E-11 | -0.917846899 |
| ENSRNOG00000024712 | Insc      | 3.8602E-11  | -2.145929455 |
| ENSRNOG00000005248 | Slc1a4    | 4.20647E-11 | -0.90437716  |
| ENSRNOG00000026605 | Ifi27l2b  | 4.43352E-11 | -1.377519482 |
| ENSRNOG00000046404 | LOC291276 | 5.71481E-11 | 3.718902121  |
| ENSRNOG00000022337 | Slitrk6   | 9.62301E-11 | -1.103912414 |
| ENSRNOG00000001074 | Mphosph9  | 1.14208E-10 | -0.984642311 |
| ENSRNOG00000030118 | Msn       | 1.38595E-10 | -1.073210303 |
| ENSRNOG00000012052 | Ins1      | 1.70908E-10 | 1.759232996  |
| ENSRNOG00000007713 | Tmcc3     | 1.9019E-10  | -0.812578557 |
| ENSRNOG00000001187 | Oasl      | 3.48112E-10 | -1.000234249 |
| ENSRNOG00000019685 | Gdpd3     | 4.64619E-10 | 2.814564113  |
| ENSRNOG00000004692 | A1bg      | 6.11901E-10 | 1.466578899  |
| ENSRNOG00000012181 | Lpl       | 7.28517E-10 | -1.892547537 |
| ENSRNOG00000008478 | Mmp13     | 7.58615E-10 | 3.051167851  |
| ENSRNOG00000011032 | Lhfp12    | 1.1671E-09  | -0.915620684 |
| ENSRNOG00000000723 | RT1-CE5   | 1.44451E-09 | 0.944684385  |
| ENSRNOG00000025702 | Kdm2b     | 1.60212E-09 | -0.95646682  |
| ENSRNOG00000020380 | Lgals7    | 1.77812E-09 | 2.297709636  |
| ENSRNOG00000013851 | Spry4     | 3.02003E-09 | -0.980601063 |
| ENSRNOG00000028713 | Acvrl1    | 3.90711E-09 | 1.693673026  |
| ENSRNOG00000049349 | Tafa5     | 6.494E-09   | -1.226374407 |
| ENSRNOG00000020505 | Map4k1    | 8.60295E-09 | 0.913202148  |
| ENSRNOG00000055672 | Gpx2      | 9.42718E-09 | -3.451645872 |
| ENSRNOG00000020583 | Fcgrt     | 1.26819E-08 | 1.772832652  |
| ENSRNOG00000008536 | Actc1     | 1.43617E-08 | -2.40418825  |
| ENSRNOG00000020531 | Fen1      | 2.29769E-08 | -0.811675199 |
| ENSRNOG00000032590 | Ttc28     | 3.99255E-08 | -1.185204316 |
| ENSRNOG00000021102 | Scn1b     | 4.02643E-08 | 1.58475123   |

|                    |                |             |              |
|--------------------|----------------|-------------|--------------|
| ENSRNOG00000028235 | RGD1560795     | 4.6759E-08  | 1.500837224  |
| ENSRNOG00000028543 | AABR07052523.1 | 1.15755E-07 | 1.095463428  |
| ENSRNOG00000025055 | Zdhhc19        | 1.3951E-07  | -2.411639305 |
| ENSRNOG00000060568 | Ptpn21         | 1.51535E-07 | -0.81526306  |
| ENSRNOG00000001520 | Dlx1           | 1.75366E-07 | -1.128945337 |
| ENSRNOG00000013658 | Nefl           | 1.76964E-07 | -1.137446144 |
| ENSRNOG00000031540 | LOC100362384   | 1.83496E-07 | 0.877224192  |
| ENSRNOG00000012862 | Spsb4          | 1.99228E-07 | -1.025345036 |
| ENSRNOG00000022699 | AABR07030039.1 | 3.22446E-07 | 1.113944525  |
| ENSRNOG00000024517 | Gpr119         | 3.45567E-07 | 1.60089125   |
| ENSRNOG00000000699 | Selplg         | 3.95946E-07 | 3.65338239   |
| ENSRNOG00000019500 | Cyp1a1         | 4.02631E-07 | -1.831788643 |
| ENSRNOG00000011541 | Cygb           | 4.12137E-07 | -0.781686982 |
| ENSRNOG00000042860 | Pappa2         | 4.13358E-07 | 0.977528215  |
| ENSRNOG00000027767 | Slc38a5        | 4.35948E-07 | 1.353652003  |
| ENSRNOG00000016695 | Mmp2           | 4.45573E-07 | -1.159923504 |
| ENSRNOG00000014550 | Plcx3          | 4.64444E-07 | -1.304584777 |
| ENSRNOG00000024093 | Dmrta1         | 7.25696E-07 | -0.926326628 |
| ENSRNOG00000000925 | Psph           | 1.32527E-06 | -0.795667907 |
| ENSRNOG00000042980 | Adam19         | 1.34748E-06 | -1.477887233 |
| ENSRNOG00000031930 | Bin2           | 1.61813E-06 | -1.908535769 |
| ENSRNOG00000013605 | AC120568.1     | 2.02953E-06 | 1.920251733  |
| ENSRNOG00000049269 | RGD1563294     | 2.07176E-06 | 0.984726204  |
| ENSRNOG00000028744 | Mtnr1a         | 2.25085E-06 | -1.188127071 |
| ENSRNOG00000046007 | Cldn3          | 2.42622E-06 | 0.917292051  |
| ENSRNOG00000017072 | Slc16a14       | 2.42968E-06 | -1.104381924 |
| ENSRNOG00000023458 | Dcaf12l1       | 2.62086E-06 | -1.030529193 |
| ENSRNOG00000053055 | Otop3          | 2.70252E-06 | 2.34073544   |
| ENSRNOG00000046428 | Lrrc75b        | 2.77975E-06 | -0.739282859 |
| ENSRNOG00000033722 | Rnf207         | 3.42233E-06 | -1.701774042 |
| ENSRNOG00000003807 | Wnt9b          | 3.96513E-06 | -1.748367489 |
| ENSRNOG00000011821 | S100a4         | 3.97527E-06 | 1.187036503  |
| ENSRNOG00000006855 | Padi4          | 5.20669E-06 | 1.848846018  |
| ENSRNOG00000018285 | Kcna2          | 5.83E-06    | -0.804578376 |
| ENSRNOG00000054246 | LOC679711      | 6.0546E-06  | 1.145466372  |
| ENSRNOG00000020259 | RGD1305347     | 6.12461E-06 | 1.12706301   |
| ENSRNOG00000014740 | Gast           | 6.76595E-06 | 1.111344935  |
| ENSRNOG00000022921 | Dact2          | 7.9998E-06  | 0.787650963  |
| ENSRNOG00000004500 | Myc            | 8.43466E-06 | 1.634493803  |
| ENSRNOG00000017525 | Epha1          | 8.70549E-06 | 0.959502409  |
| ENSRNOG00000037167 | Rtp3           | 8.75224E-06 | -1.292868907 |
| ENSRNOG00000032609 | AY172581.18    | 9.24167E-06 | 1.778449346  |
| ENSRNOG00000052368 | Clcnka         | 9.76069E-06 | 1.191707463  |
| ENSRNOG00000007490 | Gabbr2         | 9.82101E-06 | -3.087354549 |

|                     |                |             |              |
|---------------------|----------------|-------------|--------------|
| ENSRNOG00000007489  | Zfp41          | 1.16563E-05 | -0.763037026 |
| ENSRNOG00000008487  | Amotl2         | 1.52967E-05 | -1.623301894 |
| ENSRNOG000000027030 | Adm            | 1.53782E-05 | 1.035522848  |
| ENSRNOG00000009577  | Ndst4          | 1.56483E-05 | -1.576188652 |
| ENSRNOG000000052667 | AABR07027555.1 | 1.57117E-05 | 1.230511798  |
| ENSRNOG00000000873  | Brs3           | 1.57656E-05 | -1.701585639 |
| ENSRNOG000000020517 | Prrg2          | 1.78797E-05 | 0.768548172  |
| ENSRNOG00000003832  | Vash2          | 2.01673E-05 | -0.747508731 |
| ENSRNOG00000001151  | Sirt4          | 2.09198E-05 | 0.768534846  |
| ENSRNOG000000016244 | Mical2         | 2.15672E-05 | -1.157272822 |
| ENSRNOG000000012237 | Rdx            | 2.44548E-05 | -1.064944653 |
| ENSRNOG000000027574 | AABR07053879.1 | 2.56088E-05 | 1.699493504  |
| ENSRNOG000000026212 | Micall1        | 2.65156E-05 | -0.73984492  |
| ENSRNOG000000014610 | Anpep          | 2.67044E-05 | 0.77619217   |
| ENSRNOG000000020792 | Etv4           | 2.6822E-05  | -1.0068985   |
| ENSRNOG000000021318 | Epas1          | 2.73156E-05 | -0.764069594 |
| ENSRNOG000000001191 | Tchp           | 3.01154E-05 | -0.740792153 |
| ENSRNOG000000047712 | Dcx            | 3.32393E-05 | -2.225181393 |
| ENSRNOG000000025624 | Arhgap20       | 3.55607E-05 | -0.843080296 |
| ENSRNOG000000040205 | Zcchc24        | 4.42886E-05 | -1.507262732 |
| ENSRNOG000000013304 | Arg1           | 4.71E-05    | -1.258458273 |
| ENSRNOG000000010011 | Osbp13         | 5.06829E-05 | -1.122727316 |
| ENSRNOG000000054978 | H1f2           | 5.41898E-05 | 1.377826537  |
| ENSRNOG000000005382 | AABR07058423.1 | 5.65059E-05 | 1.517212553  |
| ENSRNOG000000021802 | Isg15          | 6.12576E-05 | -1.194273144 |
| ENSRNOG000000016299 | Klf4           | 6.15989E-05 | -0.994085318 |
| ENSRNOG000000012721 | Ednra          | 6.20673E-05 | -1.5049246   |
| ENSRNOG000000006526 | Sema3c         | 6.34593E-05 | -0.79552083  |
| ENSRNOG000000007607 | Nr4a1          | 6.75216E-05 | 0.869054075  |
| ENSRNOG000000025354 | Rinl           | 6.77615E-05 | 0.813853835  |
| ENSRNOG000000003870 | C1qtnf2        | 6.86041E-05 | 1.318945948  |
| ENSRNOG000000048927 | AABR07018533.1 | 7.3982E-05  | 0.865836472  |
| ENSRNOG000000049334 | Atp2c2         | 7.52667E-05 | 1.040672823  |
| ENSRNOG000000013209 | Barhl1         | 7.58384E-05 | 0.939611526  |
| ENSRNOG000000031852 | Lsamp          | 8.24901E-05 | 1.138370716  |
| ENSRNOG000000004709 | Foxn3          | 8.84845E-05 | -0.875234997 |
| ENSRNOG000000007151 | Cdk14          | 8.86267E-05 | -0.874423908 |
| ENSRNOG000000025644 | LOC499331      | 9.12598E-05 | -0.790286767 |
| ENSRNOG000000007951 | Galnt14        | 9.38337E-05 | 0.910370611  |
| ENSRNOG000000013166 | Wnt4           | 9.65255E-05 | 1.471465804  |
| ENSRNOG000000015550 | Ptgds          | 9.77039E-05 | -1.12949946  |
| ENSRNOG000000054563 | Selenoh        | 0.000103269 | 0.883856225  |
| ENSRNOG000000026169 | RGD1560146     | 0.000104151 | 4.640830191  |
| ENSRNOG000000059362 | Has3           | 0.000105092 | -0.877358178 |



|                    |                |             |              |
|--------------------|----------------|-------------|--------------|
| ENSRNOG00000056247 | 7SK            | 0.000107635 | 1.667068937  |
| ENSRNOG00000012345 | AABR07004276.1 | 0.000123367 | 1.165329757  |
| ENSRNOG00000034106 | AC127887.1     | 0.000124203 | 0.938904941  |
| ENSRNOG00000031333 | AY172581.10    | 0.000124903 | 1.865353802  |
| ENSRNOG00000014746 | Dzip1l         | 0.000130392 | -1.938488478 |
| ENSRNOG00000049402 | Nbl1           | 0.000148075 | 1.343702751  |
| ENSRNOG00000013102 | Entpd2         | 0.000162826 | 0.775546312  |
| ENSRNOG00000013196 | Dok5           | 0.000169149 | 1.027765014  |
| ENSRNOG00000020465 | Ripk3          | 0.000169223 | 1.829236622  |
| ENSRNOG00000049105 | AC095947.3     | 0.000172867 | 0.79738855   |
| ENSRNOG00000003251 | B3galt2        | 0.000174032 | 1.200083829  |
| ENSRNOG00000013239 | Tle4           | 0.000184497 | -0.850683713 |
| ENSRNOG00000059373 | LOC100909548   | 0.000193909 | 0.840806062  |
| ENSRNOG00000018301 | AABR07039356.1 | 0.000205999 | 1.162147068  |
| ENSRNOG00000014233 | Krt19          | 0.000213588 | 1.860578051  |
| ENSRNOG00000004317 | Vipr2          | 0.000264344 | -0.833027713 |
| ENSRNOG00000013090 | Gadd45g        | 0.000271022 | 1.106071693  |
| ENSRNOG00000006144 | Cntn3          | 0.000274295 | 1.026010741  |
| ENSRNOG00000006860 | Itk            | 0.000295791 | -1.316655801 |
| ENSRNOG00000033490 | Vsig2          | 0.000296624 | 1.415987606  |
| ENSRNOG00000012176 | Rab27b         | 0.000299205 | -1.035847945 |
| ENSRNOG00000033613 | AABR07030647.1 | 0.000302775 | 1.300140437  |
| ENSRNOG00000033090 | Ltbp1          | 0.00030564  | -0.81649868  |
| ENSRNOG00000056343 | Lats2          | 0.000306253 | -0.945852539 |
| ENSRNOG00000060332 | 7SK            | 0.000323146 | 1.797437729  |
| ENSRNOG00000060525 | AABR07007717.3 | 0.000323665 | -1.188076557 |
| ENSRNOG00000006170 | Bach2          | 0.000330684 | -0.834517731 |
| ENSRNOG00000053334 | Stmn4          | 0.000338217 | -1.035763713 |
| ENSRNOG00000003654 | Cldn9          | 0.000344622 | 1.082449805  |
| ENSRNOG00000046190 | AC112062.1     | 0.000349387 | 1.751999366  |
| ENSRNOG00000049162 | Prr15l         | 0.000351627 | 1.542303719  |
| ENSRNOG00000021259 | Prnp           | 0.000361008 | -0.875670655 |
| ENSRNOG00000029543 | Cish           | 0.000370379 | 0.820059985  |
| ENSRNOG00000020587 | Efemp2         | 0.000393534 | 1.075042012  |
| ENSRNOG00000019723 | LOC100910990   | 0.00040886  | -1.027883276 |
| ENSRNOG00000014265 | Tnfrsf19       | 0.000414411 | -0.819711982 |
| ENSRNOG00000010983 | Otog           | 0.000416347 | 2.181782092  |
| ENSRNOG00000004730 | Meis2          | 0.00042577  | -1.158979972 |
| ENSRNOG00000019422 | Egr1           | 0.000430006 | 0.811199226  |
| ENSRNOG00000004192 | Arhgap30       | 0.000430255 | 1.64127311   |
| ENSRNOG00000000055 | Fcrl6          | 0.000461294 | -2.601186306 |
| ENSRNOG00000007462 | Septin8        | 0.000503161 | -0.831961024 |
| ENSRNOG00000050933 | LOC100912564   | 0.000516318 | 1.444687566  |
| ENSRNOG00000043193 | Smim1          | 0.000525795 | 2.102829852  |

|                    |                |             |              |
|--------------------|----------------|-------------|--------------|
| ENSRNOG00000016885 | Klf6           | 0.000532182 | -1.06556704  |
| ENSRNOG00000032224 | RGD1562378     | 0.00053231  | 1.555975892  |
| ENSRNOG00000032539 | Spag8          | 0.000533373 | 1.045046709  |
| ENSRNOG00000037196 | Spag17         | 0.000593101 | -1.370394202 |
| ENSRNOG00000033688 | Cep170b        | 0.000614144 | -0.772407483 |
| ENSRNOG00000005515 | Rhbdl3         | 0.00063466  | -0.775522586 |
| ENSRNOG00000059319 | AABR07028013.1 | 0.000638843 | 0.946030901  |
| ENSRNOG00000029598 | Robo2          | 0.000673221 | -0.790176824 |
| ENSRNOG00000023733 | RGD1560821     | 0.000683775 | 1.230173106  |
| ENSRNOG00000032240 | Gbp5           | 0.000716793 | -1.65630239  |
| ENSRNOG00000022256 | Cxcl10         | 0.00072023  | -1.129024711 |
| ENSRNOG00000012807 | C1qa           | 0.00072614  | 1.411085214  |
| ENSRNOG00000030712 | RT1-A2         | 0.000742162 | 1.212321637  |
| ENSRNOG00000020830 | LOC108348128   | 0.000747846 | 1.339263307  |
| ENSRNOG00000004854 | Has2           | 0.000826602 | -1.567621509 |
| ENSRNOG00000057556 | Pdzrn3         | 0.000839651 | -1.188135411 |
| ENSRNOG00000033734 | Tnnt2          | 0.00091725  | 1.550065508  |
| ENSRNOG00000014171 | Tnfsf13        | 0.000979073 | -1.059464344 |
| ENSRNOG00000028576 | AABR07028446.1 | 0.001005162 | -1.146023063 |
| ENSRNOG00000024433 | Fbxl7          | 0.001038062 | -1.073327167 |
| ENSRNOG00000029115 | LOC102555453   | 0.001049966 | 0.8042756    |
| ENSRNOG00000013465 | Tepp           | 0.001053818 | 0.799771695  |
| ENSRNOG00000057207 | AABR07014239.1 | 0.001105522 | 2.099017624  |
| ENSRNOG00000006383 | Atoh1          | 0.001107682 | -1.2030408   |
| ENSRNOG00000051957 | AC126897.1     | 0.001112112 | 0.814283251  |
| ENSRNOG00000000728 | Clic2          | 0.001193714 | 2.349714288  |
| ENSRNOG00000029082 | AABR07005031.1 | 0.001228285 | 0.889639478  |
| ENSRNOG00000003800 | Rgs9           | 0.001302687 | 0.821041527  |
| ENSRNOG00000039744 | RT1-CE4        | 0.001333341 | 0.889386549  |
| ENSRNOG00000059041 | AC141169.5     | 0.001350795 | 0.962857165  |
| ENSRNOG00000053909 | 7SK            | 0.001351869 | 1.831664784  |
| ENSRNOG00000003841 | Kcnh1          | 0.001487189 | -1.132246209 |
| ENSRNOG00000004319 | AABR07038019.1 | 0.00150484  | 0.869583317  |
| ENSRNOG00000019560 | Pde2a          | 0.001509998 | 0.904648031  |
| ENSRNOG00000058507 | AABR07041972.1 | 0.0015497   | 1.536666513  |
| ENSRNOG00000027506 | Zp4            | 0.001597727 | -1.30862997  |
| ENSRNOG00000014083 | lqsec3         | 0.001629071 | -0.838979277 |
| ENSRNOG00000025164 | Bhlha15        | 0.001714838 | 1.098381351  |
| ENSRNOG00000019129 | Fcgbp          | 0.001737149 | 1.195879503  |
| ENSRNOG00000016309 | Rgp1           | 0.001859612 | -0.76376732  |
| ENSRNOG00000053787 | Mdfic          | 0.0019277   | -0.940846161 |
| ENSRNOG00000056863 | AABR07050116.1 | 0.002004692 | 1.348982297  |
| ENSRNOG00000007964 | Tp53inp1       | 0.002121726 | -0.911920074 |
| ENSRNOG00000046790 | AABR07040887.1 | 0.002137433 | -0.860960999 |

|                    |                |             |              |
|--------------------|----------------|-------------|--------------|
| ENSRNOG00000005391 | Prex2          | 0.00213918  | -0.924146427 |
| ENSRNOG00000013213 | Epha4          | 0.002143616 | -0.811907739 |
| ENSRNOG00000048704 | AABR07032392.1 | 0.002156697 | 0.921405137  |
| ENSRNOG00000008979 | Guca2b         | 0.002228311 | -1.642294972 |
| ENSRNOG00000007574 | Padi2          | 0.00226454  | 0.931100681  |
| ENSRNOG00000000574 | AC096404.1     | 0.002279257 | 1.026224643  |
| ENSRNOG00000045998 | Sema6b         | 0.002287016 | -0.952922253 |
| ENSRNOG00000022555 | LOC497899      | 0.002304628 | 0.816816003  |
| ENSRNOG00000055962 | Bgn            | 0.002395921 | -1.335338606 |
| ENSRNOG00000048758 | Snrpd2l        | 0.002407902 | 0.77435385   |
| ENSRNOG00000053946 | AC120807.1     | 0.002415072 | 1.055137871  |
| ENSRNOG00000017063 | Fcna           | 0.002423957 | 1.06732856   |
| ENSRNOG00000012417 | lapp           | 0.002450173 | 1.166679394  |
| ENSRNOG00000013971 | Psat1          | 0.002453296 | -1.071519686 |
| ENSRNOG00000003891 | Dio2           | 0.002454257 | -1.049702633 |
| ENSRNOG00000015971 | Slc12a2        | 0.002486844 | -0.75379729  |
| ENSRNOG00000003496 | Tbc1d9         | 0.002589181 | -0.913080269 |
| ENSRNOG00000049983 | Shd            | 0.002704638 | 1.176268558  |
| ENSRNOG00000005284 | Itpka          | 0.002840751 | 1.006394813  |
| ENSRNOG00000004089 | Enpp2          | 0.002890282 | 0.972397159  |
| ENSRNOG00000009892 | Adamts15       | 0.002937411 | -1.419729879 |
| ENSRNOG00000052564 | Gpx3           | 0.002984019 | 0.953206709  |
| ENSRNOG00000029260 | Pitpnm2        | 0.003001435 | -1.014623339 |
| ENSRNOG00000036960 | Abcc9          | 0.003008023 | -1.483293018 |
| ENSRNOG00000049277 | Syne4          | 0.003078    | 1.188009956  |
| ENSRNOG00000011250 | Inmt           | 0.003191062 | -1.008037622 |
| ENSRNOG00000014232 | P2ry1          | 0.003258394 | -1.094865973 |
| ENSRNOG00000027350 | Tns4           | 0.003269667 | 0.96728187   |
| ENSRNOG00000023257 | Adamts9        | 0.003281507 | -0.802931399 |
| ENSRNOG00000006649 | Thrb           | 0.003304354 | -0.742227164 |
| ENSRNOG00000018254 | Sncaip         | 0.003334554 | -1.169963541 |
| ENSRNOG00000015618 | Wnt5a          | 0.003336455 | -0.946281238 |
| ENSRNOG00000019050 | Ifit1          | 0.003346389 | -1.911970648 |
| ENSRNOG00000003736 | Col5a2         | 0.003369039 | -1.352821816 |
| ENSRNOG00000055755 | AABR07030086.1 | 0.003387487 | 0.862223925  |
| ENSRNOG00000046905 | Sgce           | 0.003496687 | 1.607889801  |
| ENSRNOG00000033575 | Emid1          | 0.003612133 | -0.759135707 |
| ENSRNOG00000017800 | Foxc1          | 0.003621568 | -0.92160182  |
| ENSRNOG00000009204 | Il17re         | 0.003679556 | -1.170617813 |
| ENSRNOG00000013565 | Zfp507         | 0.003764378 | -0.768584964 |
| ENSRNOG00000007539 | Rsad2          | 0.003818016 | -1.060314531 |
| ENSRNOG00000015696 | Cdk5rap1       | 0.003892158 | -0.814934377 |
| ENSRNOG00000001618 | Ripk4          | 0.003892788 | -0.831678883 |
| ENSRNOG00000021507 | Luzp2          | 0.003924736 | 1.371973884  |

|                     |                |             |              |
|---------------------|----------------|-------------|--------------|
| ENSRNOG00000005690  | Lmcd1          | 0.004288685 | -1.504622026 |
| ENSRNOG00000003143  | RGD1310166     | 0.004352383 | 1.373008498  |
| ENSRNOG000000046261 | Acp5           | 0.004367412 | 0.841711532  |
| ENSRNOG000000050478 | LOC102548682   | 0.004398414 | 1.138397838  |
| ENSRNOG00000001474  | Tmem270        | 0.004541764 | -0.897775968 |
| ENSRNOG000000030296 | AABR07071195.1 | 0.004563198 | 1.17424341   |
| ENSRNOG00000000463  | Col11a2        | 0.004612014 | -1.077577862 |
| ENSRNOG00000002802  | Cxcl1          | 0.004619942 | -1.45215074  |
| ENSRNOG000000025074 | Fgg            | 0.004635622 | 1.307569121  |
| ENSRNOG000000051252 | AABR07038873.1 | 0.004705134 | 0.830089729  |
| ENSRNOG00000005041  | Crip2          | 0.004760971 | -0.845584889 |
| ENSRNOG000000025332 | Cd109          | 0.004786794 | -1.321509882 |
| ENSRNOG000000059927 | AABR07044414.1 | 0.004978074 | 1.376148399  |
| ENSRNOG000000009528 | Sdcbp2         | 0.004979644 | 0.981363292  |
| ENSRNOG000000046022 | Wdr77          | 0.005037347 | 1.020052356  |
| ENSRNOG000000053516 | AABR07044454.1 | 0.005097454 | -1.631193614 |
| ENSRNOG000000005673 | Runx1t1        | 0.005804249 | -1.461115402 |
| ENSRNOG000000033528 | Tll1           | 0.005820792 | -0.76367317  |
| ENSRNOG000000020112 | AABR07036567.1 | 0.005860278 | 1.075513536  |
| ENSRNOG000000017319 | Mertk          | 0.006096824 | -0.772349519 |
| ENSRNOG000000060442 | AC091481.1     | 0.006103321 | -0.775805943 |
| ENSRNOG000000015075 | Stc1           | 0.006163495 | 1.161418768  |
| ENSRNOG000000058555 | 7SK            | 0.006193733 | 1.386918666  |
| ENSRNOG000000048951 | LOC100364500   | 0.00645321  | 1.311427421  |
| ENSRNOG000000008703 | Rnps1          | 0.006491242 | -0.760554747 |
| ENSRNOG000000028266 | Lrrc55         | 0.00665045  | -0.909077365 |
| ENSRNOG000000004794 | Rtn1           | 0.006677015 | -0.812029442 |
| ENSRNOG000000018778 | Cadm1          | 0.006717521 | -1.104627111 |
| ENSRNOG000000054890 | Flna           | 0.006721398 | -0.811721181 |
| ENSRNOG000000042101 | Zfp93          | 0.006742485 | 0.862037329  |
| ENSRNOG000000023917 | AABR07034362.1 | 0.006836    | 0.973981465  |
| ENSRNOG000000007197 | Nr1h4          | 0.006892247 | -0.864236971 |
| ENSRNOG000000042787 | Fam229a        | 0.007016731 | 0.877441643  |
| ENSRNOG000000038864 | AC135409.1     | 0.007073802 | 0.791543758  |
| ENSRNOG000000004482 | Ccdc88c        | 0.007525808 | -0.776965992 |
| ENSRNOG000000027066 | Stk32a         | 0.007966846 | -0.830758437 |
| ENSRNOG000000062225 | AABR07002792.2 | 0.007970422 | 0.918781345  |
| ENSRNOG000000058132 | SNORD29        | 0.008019646 | 0.836404294  |
| ENSRNOG000000059897 | Gjb5           | 0.008031623 | 0.897835575  |
| ENSRNOG000000038004 | Zfp804a        | 0.008292877 | 0.854700333  |
| ENSRNOG000000060952 | AABR07056183.1 | 0.008400321 | 0.966033997  |
| ENSRNOG000000016671 | Dtna           | 0.008593437 | -0.874511241 |
| ENSRNOG000000008481 | Reep1          | 0.008648177 | -0.904199386 |
| ENSRNOG000000062071 | AABR07005572.2 | 0.008682534 | 0.818959385  |

|                    |                |             |              |
|--------------------|----------------|-------------|--------------|
| ENSRNOG00000049676 | St6galnac5     | 0.00876292  | -0.943160503 |
| ENSRNOG00000013552 | Scd            | 0.008832035 | 1.044921621  |
| ENSRNOG00000049959 | Igsf21         | 0.008931909 | 1.170873362  |
| ENSRNOG00000024954 | Mgat5b         | 0.008951745 | -1.111596786 |
| ENSRNOG00000055658 | Snord69        | 0.009035271 | 1.255846895  |
| ENSRNOG00000010365 | Syn1           | 0.009357656 | -0.737938046 |
| ENSRNOG00000056487 | Oxr1           | 0.009569214 | -0.856387372 |
| ENSRNOG00000025522 | Atf7ip2        | 0.009779203 | 0.997291595  |
| ENSRNOG00000031665 | Ace2           | 0.009885766 | -1.144692626 |
| ENSRNOG00000059487 | AABR07045405.1 | 0.009918327 | -1.125990848 |
| ENSRNOG00000061908 | 7SK            | 0.009963107 | 1.645849516  |
| ENSRNOG00000029859 | AABR07021384.1 | 0.010216625 | 0.814626597  |
| ENSRNOG00000000105 | Cplx2          | 0.010377176 | -2.2140417   |
| ENSRNOG00000014761 | Rasd2          | 0.010411049 | -1.002753917 |
| ENSRNOG00000001249 | Col6a1         | 0.010439756 | 2.618054254  |
| ENSRNOG00000014613 | Ddah1          | 0.010445644 | -0.932914561 |
| ENSRNOG00000045749 | AC105515.1     | 0.010759719 | 1.386754864  |
| ENSRNOG00000030107 | AABR07049329.1 | 0.010914278 | 0.828287333  |
| ENSRNOG00000047459 | H1f4           | 0.010969004 | 1.234778657  |
| ENSRNOG00000020532 | Kcnq1          | 0.011041436 | 0.93499673   |
| ENSRNOG00000008015 | Fos            | 0.011045495 | 1.192832731  |
| ENSRNOG00000019791 | Sipa1l2        | 0.011213443 | -0.745172709 |
| ENSRNOG00000030748 | AABR07008421.1 | 0.01128491  | 1.031657534  |
| ENSRNOG00000045781 | Mir3561        | 0.011287001 | 1.221034554  |
| ENSRNOG00000005375 | RGD1564053     | 0.011352957 | -0.864856618 |
| ENSRNOG00000021062 | Fxyd5          | 0.011462294 | 0.938067969  |
| ENSRNOG00000031634 | AABR07033920.1 | 0.011516347 | 1.08784736   |
| ENSRNOG00000008173 | Sesn3          | 0.011548926 | -1.273867467 |
| ENSRNOG00000059344 | Tpcn1          | 0.012039701 | -0.853378451 |
| ENSRNOG00000007189 | Ttc22          | 0.012207249 | 0.99468525   |
| ENSRNOG00000027787 | Cdc6           | 0.012283112 | -0.748676703 |
| ENSRNOG00000053850 | Rdh5           | 0.01271603  | 1.115343014  |
| ENSRNOG00000017597 | Fbp1           | 0.012723744 | 1.130624415  |
| ENSRNOG00000009884 | Lgals1         | 0.012764759 | 0.77225133   |
| ENSRNOG00000060434 | AABR07053500.2 | 0.012831646 | -1.495947209 |
| ENSRNOG00000061441 | AABR07071935.1 | 0.012854922 | 0.950338836  |
| ENSRNOG00000001159 | Tff3           | 0.013129001 | 1.253582665  |
| ENSRNOG00000030214 | AABR07029002.1 | 0.013462432 | 0.845446572  |
| ENSRNOG00000061205 | AABR07032532.2 | 0.013486062 | 1.120862413  |
| ENSRNOG00000025394 | Tanc1          | 0.013525568 | -0.7714834   |
| ENSRNOG00000016348 | Tat            | 0.01363507  | 1.054053959  |
| ENSRNOG00000014971 | Mas1           | 0.013680163 | -0.950867052 |
| ENSRNOG00000039571 | Glod5          | 0.013719922 | 0.852626102  |
| ENSRNOG00000020652 | Tgfb1          | 0.014061801 | 0.82212358   |

|                    |                |             |              |
|--------------------|----------------|-------------|--------------|
| ENSRNOG00000019118 | Slc13a3        | 0.014493827 | 1.208667798  |
| ENSRNOG00000051196 | AABR07018038.1 | 0.014928641 | -0.738120385 |
| ENSRNOG00000057505 | AABR07015015.2 | 0.015150813 | 1.029370869  |
| ENSRNOG00000029267 | LOC103690821   | 0.015326444 | 0.922276013  |
| ENSRNOG00000022975 | Nfam1          | 0.01541432  | 1.066477314  |
| ENSRNOG00000050869 | Cebpd          | 0.015543467 | 0.894734841  |
| ENSRNOG00000034150 | AABR07041778.1 | 0.015551651 | 1.037135018  |
| ENSRNOG00000009373 | RGD1562690     | 0.015677456 | 1.012015384  |
| ENSRNOG00000046144 | H3c1           | 0.016007172 | 0.922242724  |
| ENSRNOG00000049407 | Shisa8         | 0.016018683 | 2.163091878  |
| ENSRNOG00000033695 | AC095825.1     | 0.016195458 | 0.884877459  |
| ENSRNOG00000060502 | SNORD96        | 0.016384663 | 0.770696898  |
| ENSRNOG00000019931 | Map3k21        | 0.016401138 | -1.887915979 |
| ENSRNOG00000009072 | AABR07056013.1 | 0.016674832 | 0.850416945  |
| ENSRNOG00000012772 | Nqo1           | 0.017015645 | -0.81406233  |
| ENSRNOG00000014183 | Gnaq           | 0.017645705 | -0.97137295  |
| ENSRNOG00000045646 | LOC102549173   | 0.017811119 | 0.925359543  |
| ENSRNOG00000012660 | Postn          | 0.017955509 | 0.774044903  |
| ENSRNOG00000061527 | Gck            | 0.018205201 | 0.907463059  |
| ENSRNOG00000019902 | Folr1          | 0.018227993 | 0.886017936  |
| ENSRNOG00000053769 | Soat2          | 0.018253064 | 0.776764407  |
| ENSRNOG00000021435 | AC141966.1     | 0.018254338 | 1.02083429   |
| ENSRNOG00000016874 | Zfp521         | 0.018284022 | -0.858332122 |
| ENSRNOG00000013547 | Slc6a12        | 0.018482311 | 0.850472815  |
| ENSRNOG00000018764 | B3gnt3         | 0.018579572 | 0.895210683  |
| ENSRNOG00000022738 | AC098459.1     | 0.018620224 | 1.352435683  |
| ENSRNOG00000057557 | Prlr           | 0.018755885 | 0.93473251   |
| ENSRNOG00000053813 | Nkap           | 0.019213867 | -0.858808539 |
| ENSRNOG00000060020 | C1ql4          | 0.01924857  | 0.864495755  |
| ENSRNOG00000039568 | Mgat4e         | 0.019454509 | 0.977203243  |
| ENSRNOG00000028895 | Rtp4           | 0.020232604 | -1.246833258 |
| ENSRNOG00000001757 | Tm4sf19        | 0.020245164 | -0.854572415 |
| ENSRNOG00000003283 | Rcsd1          | 0.0203076   | -1.233554885 |
| ENSRNOG00000008398 | AABR07055789.1 | 0.020677697 | -1.406820263 |
| ENSRNOG00000032765 | AABR07068536.1 | 0.02073075  | 1.060755572  |
| ENSRNOG00000000943 | AC136867.1     | 0.020884191 | 0.828203635  |
| ENSRNOG00000031706 | RGD1563601     | 0.020972114 | 0.795349148  |
| ENSRNOG00000010362 | Anxa2          | 0.021137396 | -0.815586479 |
| ENSRNOG00000027229 | Slc35d2        | 0.021192325 | -1.097536749 |
| ENSRNOG00000004874 | Flrt3          | 0.021249715 | -1.013011749 |
| ENSRNOG00000048733 | Nup62          | 0.021346236 | -0.745254296 |
| ENSRNOG00000024923 | Nnat           | 0.021811206 | -1.291039262 |
| ENSRNOG00000031790 | H2bu1          | 0.022048202 | 1.651093009  |
| ENSRNOG00000055293 | Ptpnb          | 0.022288243 | 0.999377835  |

|                    |                |             |              |
|--------------------|----------------|-------------|--------------|
| ENSRNOG00000004753 | Napb           | 0.022548435 | -1.59834726  |
| ENSRNOG00000036856 | AC097183.1     | 0.022604336 | 0.969685023  |
| ENSRNOG00000050729 | LOC102555217   | 0.023119182 | 0.847722047  |
| ENSRNOG00000014647 | Cbfb           | 0.023937328 | -0.835555525 |
| ENSRNOG00000061479 | LOC102555038   | 0.024001409 | -0.99328543  |
| ENSRNOG00000023896 | Dusp6          | 0.024517792 | -0.741328638 |
| ENSRNOG00000015854 | AABR07051831.1 | 0.024536008 | 1.014160318  |
| ENSRNOG00000058899 | Snord49a       | 0.025197233 | 0.774005158  |
| ENSRNOG00000061979 | AC120096.2     | 0.025260264 | 0.925159911  |
| ENSRNOG00000020478 | Camk4          | 0.025331601 | -0.759794176 |
| ENSRNOG00000014658 | Zfp423         | 0.025476849 | 0.824814653  |
| ENSRNOG00000047943 | LOC108348106   | 0.02597707  | 0.810399881  |
| ENSRNOG00000028330 | AABR07067600.1 | 0.025993016 | 0.795337848  |
| ENSRNOG00000018358 | Nt5dc2         | 0.026205678 | 0.919165001  |
| ENSRNOG00000030321 | LOC502176      | 0.026589424 | 0.859189118  |
| ENSRNOG00000011659 | Alpk3          | 0.026634938 | 0.970724026  |
| ENSRNOG00000046740 | LOC688672      | 0.026905792 | 0.83983645   |
| ENSRNOG00000029558 | Pabpn1l        | 0.026957694 | 1.164253148  |
| ENSRNOG00000050706 | Col25a1        | 0.027209733 | -1.515651752 |
| ENSRNOG00000004805 | Stac2          | 0.027374469 | 0.778776999  |
| ENSRNOG00000061925 | AABR07059159.1 | 0.02744146  | -1.165921966 |
| ENSRNOG00000049649 | Hist1h2ah      | 0.027529166 | 0.970218983  |
| ENSRNOG00000022609 | Mrps10         | 0.027914206 | 0.768179354  |
| ENSRNOG00000049380 | AABR07033657.1 | 0.028288557 | 0.843022843  |
| ENSRNOG00000008843 | Eci1           | 0.028437962 | 0.845223485  |
| ENSRNOG00000031590 | AABR07048308.2 | 0.029714311 | 1.057491706  |
| ENSRNOG00000021581 | Rapgef2        | 0.029789128 | -0.79785118  |
| ENSRNOG00000008658 | Mitf           | 0.029967239 | -0.806062659 |
| ENSRNOG00000003266 | LOC100361655   | 0.030381013 | 0.837965535  |
| ENSRNOG00000060395 | AABR07025301.1 | 0.03099389  | 1.0962684    |
| ENSRNOG00000010484 | Zdhhc21        | 0.031038805 | -0.948472993 |
| ENSRNOG00000028845 | Ebf1           | 0.031441661 | -0.963123636 |
| ENSRNOG00000013018 | Eda2r          | 0.031584715 | -1.89489354  |
| ENSRNOG00000005576 | Rpia           | 0.031784003 | -0.807314443 |
| ENSRNOG00000053620 | AABR07051069.1 | 0.031951499 | 1.23927566   |
| ENSRNOG00000041826 | AABR07053152.1 | 0.032029924 | 0.931789451  |
| ENSRNOG00000018237 | Gstp1          | 0.032809234 | -0.75060468  |
| ENSRNOG00000014197 | Tmem51         | 0.033947845 | 0.90161508   |
| ENSRNOG00000056485 | LOC103694903   | 0.03526823  | 0.889740777  |
| ENSRNOG00000001227 | Adarb1         | 0.035435376 | -0.82285646  |
| ENSRNOG00000022595 | LOC100362965   | 0.035665407 | 0.909335358  |
| ENSRNOG00000048834 | Plin3          | 0.035673383 | 2.469908258  |
| ENSRNOG00000016336 | AABR07045373.1 | 0.035824981 | 0.901242372  |
| ENSRNOG00000056942 | SNORD31        | 0.036018411 | 0.896850727  |

|                    |                |             |              |
|--------------------|----------------|-------------|--------------|
| ENSRNOG00000018109 | Clic4          | 0.036122429 | -1.626583958 |
| ENSRNOG00000062002 | Kcna3          | 0.03645952  | -1.504050996 |
| ENSRNOG00000011854 | Dennd11        | 0.036500705 | -1.283600543 |
| ENSRNOG00000032947 | AABR07067749.1 | 0.036706906 | 1.022584921  |
| ENSRNOG00000001123 | RGD1562310     | 0.037433464 | -0.963573847 |
| ENSRNOG00000023068 | Cd5l           | 0.037522246 | -1.022953597 |
| ENSRNOG00000020129 | Cdh3           | 0.038206721 | -0.842827704 |
| ENSRNOG00000042753 | Fgf13          | 0.038232128 | -0.886021562 |
| ENSRNOG00000031669 | Lpp            | 0.038481229 | 1.251049741  |
| ENSRNOG00000042752 | AABR07065010.1 | 0.038527852 | 0.884240728  |
| ENSRNOG00000060156 | SNORD28        | 0.03963364  | 0.771664341  |
| ENSRNOG00000019316 | Sh3bp4         | 0.040852495 | -0.873162313 |
| ENSRNOG00000048585 | AABR07018244.1 | 0.041173647 | 0.785360918  |
| ENSRNOG00000011642 | Tfap2d         | 0.041473238 | -0.774298301 |
| ENSRNOG00000011009 | Cmtm4          | 0.041489733 | -1.523468078 |
| ENSRNOG00000062228 | LOC100359515   | 0.04229718  | -1.776535531 |
| ENSRNOG00000062246 | AABR07003509.1 | 0.042651163 | 1.004497662  |
| ENSRNOG00000021745 | Bhlhe22        | 0.043069871 | -1.19541723  |
| ENSRNOG00000024259 | Tmem54         | 0.043628354 | 0.801407158  |
| ENSRNOG00000015848 | Etfrf1         | 0.043683776 | 0.944974267  |
| ENSRNOG00000049985 | Gprasp1        | 0.044773032 | -0.810227945 |
| ENSRNOG00000046181 | Anks4b         | 0.044787123 | -0.746744011 |
| ENSRNOG00000058136 | Vom1r90        | 0.04494678  | -1.496734821 |
| ENSRNOG00000030299 | AABR07024742.1 | 0.046101202 | 0.983916875  |
| ENSRNOG00000030447 | AC105662.1     | 0.046183363 | 0.898049883  |
| ENSRNOG00000048812 | Gpx1           | 0.046302472 | 0.981769305  |
| ENSRNOG00000033673 | AABR07061532.1 | 0.047188744 | 1.21691595   |
| ENSRNOG00000017842 | Scnn1g         | 0.047287865 | 0.820718925  |
| ENSRNOG00000032148 | AABR07018050.1 | 0.047753835 | 1.18005106   |
| ENSRNOG00000006950 | Padi3          | 0.047903076 | 0.861607138  |
| ENSRNOG00000055292 | LOC679087      | 0.048127967 | 0.851137352  |
| ENSRNOG00000036665 | AC110474.1     | 0.048434055 | 1.088681656  |
| ENSRNOG00000006033 | LOC100910790   | 0.048502184 | -0.759955971 |
| ENSRNOG00000042905 | RT1-T24-4      | 0.049861467 | 0.862123419  |

### **Supplementary Table S3 (set 3 differentially expressed genes)**

| Ensemble ID        | Gene name | p-value     | log2FoldChange |
|--------------------|-----------|-------------|----------------|
| ENSRNOG00000002413 | Gpc4      | 4.58501E-17 | 2.188752181    |
| ENSRNOG00000026605 | Ifi27l2b  | 6.57965E-16 | -2.162404371   |
| ENSRNOG00000000825 | Calhm5    | 1.59635E-13 | 4.220348562    |
| ENSRNOG00000009031 | Gucy2c    | 1.65021E-12 | 3.014197153    |
| ENSRNOG00000012906 | Bcas1     | 2.66001E-12 | -4.438778076   |



|                    |                |             |              |
|--------------------|----------------|-------------|--------------|
| ENSRNOG00000037188 | Mug1           | 1.00636E-09 | 4.3341293    |
| ENSRNOG00000020325 | Calhm2         | 1.2174E-09  | 2.145719468  |
| ENSRNOG00000032699 | Ttyh1          | 3.77758E-09 | 1.780735551  |
| ENSRNOG00000027767 | Slc38a5        | 2.97848E-08 | 3.272845012  |
| ENSRNOG00000045919 | LOC103694120   | 3.19256E-08 | 5.662724359  |
| ENSRNOG00000007539 | Rsad2          | 3.47387E-08 | -1.858110862 |
| ENSRNOG00000013166 | Wnt4           | 5.5766E-08  | 2.06127471   |
| ENSRNOG00000024517 | Gpr119         | 9.86361E-08 | 2.53937917   |
| ENSRNOG00000025055 | Zdhhc19        | 5.08162E-07 | -4.17764389  |
| ENSRNOG00000010011 | Osbp13         | 5.49993E-07 | -1.660623302 |
| ENSRNOG00000021802 | Isg15          | 6.14088E-07 | -1.6308009   |
| ENSRNOG00000000463 | Col11a2        | 6.90978E-07 | -1.338591538 |
| ENSRNOG00000022921 | Dact2          | 7.67474E-07 | 1.708545282  |
| ENSRNOG00000017427 | LOC100909840   | 9.8389E-07  | 4.305869045  |
| ENSRNOG00000001187 | Oasl           | 1.60515E-06 | -1.41749886  |
| ENSRNOG00000031167 | AABR07054319.1 | 1.78335E-06 | 5.135476384  |
| ENSRNOG00000053055 | Otop3          | 3.11692E-06 | 4.04106576   |
| ENSRNOG00000037167 | Rtp3           | 3.51193E-06 | -1.548953382 |
| ENSRNOG00000021507 | Luzp2          | 4.39524E-06 | 2.25268066   |
| ENSRNOG00000006280 | Pcsk9          | 4.91755E-06 | 2.423760595  |
| ENSRNOG00000059232 | U6             | 4.95313E-06 | -4.759441514 |
| ENSRNOG00000022256 | Cxcl10         | 5.20296E-06 | -1.964640147 |
| ENSRNOG00000013092 | Lonrf3         | 5.83416E-06 | 1.158044512  |
| ENSRNOG00000033722 | Rnf207         | 5.93489E-06 | -2.108479092 |
| ENSRNOG00000021011 | Fut2           | 1.05141E-05 | 1.682484759  |
| ENSRNOG00000012417 | Iapp           | 1.13441E-05 | 2.348244856  |
| ENSRNOG00000022267 | AABR07039334.1 | 1.26177E-05 | 4.037531898  |
| ENSRNOG00000030954 | Fat1           | 1.37827E-05 | 1.241846984  |
| ENSRNOG00000046404 | LOC291276      | 1.49036E-05 | 4.198409199  |
| ENSRNOG00000010725 | Cpa1           | 1.49561E-05 | -1.900350831 |
| ENSRNOG00000017525 | Epha1          | 2.0835E-05  | 2.299636095  |
| ENSRNOG00000015075 | Stc1           | 2.18714E-05 | 2.288001872  |
| ENSRNOG00000007048 | Rap1b          | 2.21757E-05 | 1.354085254  |
| ENSRNOG00000053334 | Stmn4          | 2.63359E-05 | -1.449545344 |
| ENSRNOG00000008337 | Gjd2           | 3.28199E-05 | 2.078994973  |
| ENSRNOG00000011411 | Adgrg6         | 3.47326E-05 | 4.581623077  |
| ENSRNOG00000020792 | Etv4           | 3.53519E-05 | -1.728493476 |
| ENSRNOG00000006331 | Elovl5         | 3.8725E-05  | 2.570325019  |
| ENSRNOG00000000055 | Fcrl6          | 6.00224E-05 | -3.05982555  |
| ENSRNOG00000012052 | Ins1           | 6.11068E-05 | 1.592583804  |
| ENSRNOG00000010758 | Lpar2          | 6.66505E-05 | 4.797522219  |
| ENSRNOG00000001849 | Mapk1          | 6.72366E-05 | 1.385324929  |
| ENSRNOG00000022537 | E2f8           | 6.73713E-05 | 2.002873506  |
| ENSRNOG00000001640 | Tomm70         | 6.85445E-05 | 1.469914054  |

|                    |                |             |              |
|--------------------|----------------|-------------|--------------|
| ENSRNOG00000028895 | Rtp4           | 6.99626E-05 | -1.940757465 |
| ENSRNOG00000004192 | Arhgap30       | 7.55298E-05 | 2.337079711  |
| ENSRNOG00000018420 | Slc22a7        | 7.58136E-05 | 2.125371002  |
| ENSRNOG00000004089 | Enpp2          | 7.75426E-05 | 2.130171251  |
| ENSRNOG00000016983 | Myh7           | 7.75986E-05 | 6.169814497  |
| ENSRNOG00000015550 | Ptgds          | 8.83909E-05 | -1.204667149 |
| ENSRNOG00000013304 | Arg1           | 8.97845E-05 | -1.545457031 |
| ENSRNOG00000053706 | Lonrf1         | 9.28315E-05 | 2.945033282  |
| ENSRNOG00000034230 | Fcrl1          | 9.45911E-05 | -3.254763907 |
| ENSRNOG00000053044 | AABR07012775.1 | 9.81482E-05 | -2.598016137 |
| ENSRNOG00000054282 | AABR07072203.1 | 0.000103454 | -4.104204783 |
| ENSRNOG00000008536 | Actc1          | 0.000118065 | -2.669871756 |
| ENSRNOG00000008979 | Guca2b         | 0.000128776 | -1.962152489 |
| ENSRNOG00000000021 | AABR07061902.1 | 0.000136196 | 4.025341129  |
| ENSRNOG00000015376 | Npas1          | 0.000141301 | 3.391721132  |
| ENSRNOG00000049437 | Gpc1           | 0.000141863 | 2.409340816  |
| ENSRNOG00000001729 | Xxylt1         | 0.000150979 | 4.151378454  |
| ENSRNOG00000013443 | Tm9sf3         | 0.000153106 | 1.37948961   |
| ENSRNOG00000050869 | Cebpd          | 0.000155215 | 1.361173306  |
| ENSRNOG00000008000 | Syt13          | 0.000155687 | 0.950581949  |
| ENSRNOG00000000595 | Traf3ip2       | 0.000158242 | -1.136827308 |
| ENSRNOG00000009373 | RGD1562690     | 0.00017358  | 2.076321508  |
| ENSRNOG00000003025 | AABR07039336.2 | 0.000177387 | 1.579284286  |
| ENSRNOG00000005486 | Phf20l1        | 0.000180502 | -1.982287168 |
| ENSRNOG00000002802 | Cxcl1          | 0.000181711 | -2.143052942 |
| ENSRNOG00000004100 | Trib1          | 0.000193138 | 3.097708506  |
| ENSRNOG00000007514 | Sox12          | 0.000219318 | 3.56098831   |
| ENSRNOG00000047712 | Dcx            | 0.000223468 | -2.321898915 |
| ENSRNOG00000046327 | Rbpj           | 0.000228377 | 1.045255301  |
| ENSRNOG00000054172 | Ctnnb1         | 0.000231711 | 2.361192115  |
| ENSRNOG00000005369 | Kcnj3          | 0.000232178 | 1.816501479  |
| ENSRNOG00000047628 | Khsrp          | 0.000246502 | 2.458963269  |
| ENSRNOG00000058710 | AABR07021465.2 | 0.000248472 | 2.803310989  |
| ENSRNOG00000046727 | Abcc2          | 0.000249981 | -1.416213681 |
| ENSRNOG00000012881 | Fgl2           | 0.000252991 | 1.3522542    |
| ENSRNOG00000022800 | Sp140          | 0.000256991 | -1.508302625 |
| ENSRNOG00000025742 | Lmnb2          | 0.000258279 | 3.320084874  |
| ENSRNOG00000009323 | Fam214b        | 0.000268898 | 1.664833686  |
| ENSRNOG00000019598 | Vegfa          | 0.000269698 | 1.182043369  |
| ENSRNOG00000021176 | Mtmr11         | 0.000270887 | -0.87507157  |
| ENSRNOG00000010362 | Anxa2          | 0.000282296 | -1.078915621 |
| ENSRNOG00000048961 | Bhlhe41        | 0.000295509 | 3.58361496   |
| ENSRNOG00000014288 | Fn1            | 0.000296053 | 1.763506511  |
| ENSRNOG00000026120 | Fam8a1         | 0.000311159 | 2.918646847  |

|                    |                |             |              |
|--------------------|----------------|-------------|--------------|
| ENSRNOG00000056148 | Nudcd3         | 0.00031237  | 3.151835563  |
| ENSRNOG00000001212 | Dnmt3l         | 0.000315043 | -2.607145129 |
| ENSRNOG00000062101 | Ace            | 0.000334486 | 3.408858348  |
| ENSRNOG00000009514 | Mme            | 0.00033502  | 1.102553329  |
| ENSRNOG00000014689 | Zbtb4          | 0.000344844 | 3.947537491  |
| ENSRNOG00000011124 | AABR07067267.1 | 0.000367178 | 1.552796995  |
| ENSRNOG00000012728 | Nkx2-2         | 0.000373996 | 1.653786995  |
| ENSRNOG00000015406 | Pgm5           | 0.000392929 | 3.070888867  |
| ENSRNOG00000009884 | Lgals1         | 0.000395637 | 1.255198528  |
| ENSRNOG00000004692 | A1bg           | 0.000396079 | 1.695638808  |
| ENSRNOG00000017434 | Mgat3          | 0.000400198 | 3.272787024  |
| ENSRNOG00000000781 | Rnf39          | 0.000401109 | 1.322378303  |
| ENSRNOG00000056716 | Zbtb20         | 0.000410906 | -1.891844258 |
| ENSRNOG00000012393 | S100a13        | 0.000415094 | -1.328717303 |
| ENSRNOG00000061998 | AABR07044421.1 | 0.000444398 | 3.392731965  |
| ENSRNOG00000032414 | Tmem161b       | 0.000451439 | 1.20955013   |
| ENSRNOG00000059142 | Dtwd2          | 0.000454257 | 2.132384377  |
| ENSRNOG00000013798 | Fnbp1l         | 0.000456282 | 1.103038764  |
| ENSRNOG00000026953 | Gpr88          | 0.000467039 | 1.023904524  |
| ENSRNOG00000007668 | Mafa           | 0.000477601 | 5.515978927  |
| ENSRNOG00000014035 | Arhgef4        | 0.000481903 | 4.020473126  |
| ENSRNOG00000020295 | Plekhn1        | 0.000484291 | -1.272752271 |
| ENSRNOG00000012054 | Zmpste24       | 0.000487498 | 1.196737945  |
| ENSRNOG00000036701 | Actg1          | 0.000489285 | 2.430125298  |
| ENSRNOG00000002934 | Atp1b1         | 0.000492925 | 1.047678097  |
| ENSRNOG00000049407 | Shisa8         | 0.00049517  | 3.359676507  |
| ENSRNOG00000060229 | Arf1           | 0.000497172 | 1.886037884  |
| ENSRNOG00000009019 | Slc6a6         | 0.000503533 | 2.007122893  |
| ENSRNOG00000013452 | Rcn1           | 0.000508687 | 2.050508462  |
| ENSRNOG00000048875 | Znrf4          | 0.000509135 | 3.135678353  |
| ENSRNOG00000003769 | Tmem163        | 0.000510142 | 1.231611944  |
| ENSRNOG00000058545 | Arhgap4        | 0.000531485 | -1.078211572 |
| ENSRNOG00000038572 | Ncapg          | 0.00053304  | 1.176664948  |
| ENSRNOG00000019295 | Rab12          | 0.000546586 | 2.758796256  |
| ENSRNOG00000060063 | Naa10          | 0.000546843 | -1.138640368 |
| ENSRNOG00000016704 | Pcyox1         | 0.000559853 | 2.304317216  |
| ENSRNOG00000053813 | Nkap           | 0.00056608  | -1.860679233 |
| ENSRNOG00000021128 | Kcnj11         | 0.000571218 | 1.030698114  |
| ENSRNOG00000045770 | Hira           | 0.000572234 | 4.277212635  |
| ENSRNOG00000029360 | Serinc1        | 0.000573829 | 1.782291276  |
| ENSRNOG00000024832 | Gpr158         | 0.000581247 | 2.62771344   |
| ENSRNOG00000020557 | Ryr1           | 0.000588945 | -1.164631974 |
| ENSRNOG00000024492 | Ap1ar          | 0.000606003 | 2.176091497  |
| ENSRNOG00000031113 | Zscan22        | 0.000607637 | 3.038969337  |

|                    |                |             |              |
|--------------------|----------------|-------------|--------------|
| ENSRNOG00000006987 | Tmem263        | 0.000608429 | 2.055539454  |
| ENSRNOG00000019730 | Inpp1          | 0.000619486 | 3.024861867  |
| ENSRNOG00000045738 | Ak4            | 0.000648723 | 3.654464482  |
| ENSRNOG00000004500 | Myc            | 0.000649907 | 1.417332524  |
| ENSRNOG00000053452 | LOC100361457   | 0.000653115 | 1.171597555  |
| ENSRNOG00000033280 | Pam            | 0.000655454 | 1.005570647  |
| ENSRNOG00000047453 | Casd1          | 0.000656812 | 1.950152641  |
| ENSRNOG00000008553 | Mthfr          | 0.000659947 | 4.082065992  |
| ENSRNOG00000010813 | Tspan14        | 0.000667321 | 2.398698937  |
| ENSRNOG00000009856 | Sypl1          | 0.000685389 | 1.074712159  |
| ENSRNOG00000022941 | AABR07004746.1 | 0.000693127 | 2.063046149  |
| ENSRNOG00000042499 | LOC100364435   | 0.000696681 | -1.216183187 |
| ENSRNOG00000003832 | Vash2          | 0.000709825 | -1.349712346 |
| ENSRNOG00000015297 | RGD1561662     | 0.000712086 | 2.095423101  |
| ENSRNOG00000039587 | Wdr13          | 0.00071874  | 2.505960852  |
| ENSRNOG00000017429 | Lat            | 0.000719881 | -1.112753376 |
| ENSRNOG00000005308 | Tmx2           | 0.000727603 | 1.302348268  |
| ENSRNOG00000061316 | Ulbpl          | 0.000730756 | 1.544092451  |
| ENSRNOG00000015354 | Aox1           | 0.000756421 | -1.089818885 |
| ENSRNOG00000013851 | Spry4          | 0.000764145 | -1.204956678 |
| ENSRNOG00000010880 | Gpr27          | 0.000770023 | 2.76617284   |
| ENSRNOG00000022738 | AC098459.1     | 0.000793602 | 2.717785304  |
| ENSRNOG00000020930 | Atxn7l3        | 0.000821801 | 2.736205435  |
| ENSRNOG00000013946 | Rnf149         | 0.000850013 | 2.642713188  |
| ENSRNOG00000022698 | Vsig10         | 0.000853243 | 2.583753225  |
| ENSRNOG00000007561 | Glb1l2         | 0.000871088 | 2.377141453  |
| ENSRNOG00000004909 | Cnot2          | 0.000892985 | 1.041806992  |
| ENSRNOG00000020261 | Fam53c         | 0.000926528 | 3.215234987  |
| ENSRNOG00000025074 | Fgg            | 0.000944444 | 1.836162923  |
| ENSRNOG00000009282 | Nub1           | 0.000951727 | 2.175437103  |
| ENSRNOG00000005130 | LOC103693780   | 0.000953745 | 2.222141145  |
| ENSRNOG00000019613 | Syt9           | 0.000964025 | 2.458906789  |
| ENSRNOG00000005498 | Gcg            | 0.000971271 | 2.347458579  |
| ENSRNOG00000011287 | Minpp1         | 0.000977482 | 2.054594595  |
| ENSRNOG00000001217 | Lrrc3          | 0.000983738 | 3.415324558  |
| ENSRNOG00000006832 | Zdhhc5         | 0.000986825 | 1.848010225  |
| ENSRNOG00000055246 | Ncor1          | 0.000991187 | -1.488146176 |
| ENSRNOG00000023467 | Fam168b        | 0.000993149 | 1.786942787  |
| ENSRNOG00000004405 | Pigr           | 0.001000622 | 2.568677011  |
| ENSRNOG00000016950 | Otud1          | 0.001000715 | 3.285101664  |
| ENSRNOG00000015177 | Sun2           | 0.001007885 | 3.067686628  |
| ENSRNOG00000013547 | Slc6a12        | 0.001024118 | 2.185872921  |
| ENSRNOG00000005260 | Acp1           | 0.001026019 | 1.337043874  |
| ENSRNOG00000005818 | RGD1563349     | 0.001032079 | 1.246595502  |

|                     |                |             |              |
|---------------------|----------------|-------------|--------------|
| ENSRNOG00000027592  | Rerg           | 0.001043407 | -2.021317058 |
| ENSRNOG00000006241  | Marchf7        | 0.001047644 | 1.935154854  |
| ENSRNOG000000057096 | Gnai1          | 0.001049009 | 2.305116002  |
| ENSRNOG00000019992  | AABR07054400.1 | 0.001050816 | 2.102703691  |
| ENSRNOG00000010109  | Nol9           | 0.001060044 | 2.439650563  |
| ENSRNOG00000010064  | Abcc4          | 0.001113202 | 2.19193811   |
| ENSRNOG000000061544 | Spock2         | 0.001125128 | 3.048550645  |
| ENSRNOG00000003134  | Slc4a4         | 0.001129442 | 2.849514593  |
| ENSRNOG000000051420 | Cables2        | 0.001138848 | 2.561473611  |
| ENSRNOG00000007759  | Foxd2          | 0.001147955 | 2.877590509  |
| ENSRNOG00000005191  | Trim44         | 0.00115455  | 2.27560385   |
| ENSRNOG00000049349  | Tafa5          | 0.001155657 | -1.298442464 |
| ENSRNOG00000004628  | Dazap2         | 0.001160376 | 1.214079927  |
| ENSRNOG00000049496  | Trim62         | 0.001160475 | 3.456556166  |
| ENSRNOG00000017974  | Gprin1         | 0.001173997 | 3.314194002  |
| ENSRNOG00000012106  | Dnaja4         | 0.001175042 | 1.190152399  |
| ENSRNOG00000006600  | Unk            | 0.001185754 | 2.219992606  |
| ENSRNOG00000007034  | Hipk2          | 0.001188312 | -1.45077923  |
| ENSRNOG00000042860  | Pappa2         | 0.001193301 | 1.164116872  |
| ENSRNOG00000019346  | LOC103693999   | 0.001194051 | 1.417038025  |
| ENSRNOG00000010853  | Chrna7         | 0.001202412 | 2.713046764  |
| ENSRNOG00000003189  | Cited1         | 0.001208938 | -0.98344466  |
| ENSRNOG00000042340  | LOC679894      | 0.001209239 | -2.212360678 |
| ENSRNOG00000009625  | Dpysl2         | 0.001233555 | 2.471015741  |
| ENSRNOG00000011417  | Pde3b          | 0.001251181 | 1.311602918  |
| ENSRNOG000000050445 | Gde1           | 0.001256867 | 2.161372679  |
| ENSRNOG00000018803  | Mrtfa          | 0.001261095 | 2.681017529  |
| ENSRNOG00000015428  | Mff            | 0.001267765 | 2.356186635  |
| ENSRNOG00000024027  | Lemd3          | 0.001268099 | 1.169428917  |
| ENSRNOG000000055446 | Amfr           | 0.001278577 | 2.757032685  |
| ENSRNOG00000021438  | Tuba1c         | 0.001291497 | 2.717717059  |
| ENSRNOG00000004423  | Zbtb18         | 0.001292395 | 3.109246328  |
| ENSRNOG00000025669  | Tmem104        | 0.001294831 | 3.461843235  |
| ENSRNOG00000028733  | Prkar1b        | 0.001297267 | 2.696197159  |
| ENSRNOG00000025349  | Maneal         | 0.001311656 | 2.790524059  |
| ENSRNOG00000019958  | Tmem151b       | 0.001319545 | 3.243294469  |
| ENSRNOG00000014675  | Pi4k2a         | 0.001344345 | 2.590495309  |
| ENSRNOG00000014209  | Utp6           | 0.001345434 | 2.228921531  |
| ENSRNOG00000000606  | Pcdh15         | 0.001349611 | 2.531442931  |
| ENSRNOG00000010298  | Xbp1           | 0.001355903 | 1.262936609  |
| ENSRNOG00000015970  | Tbc1d13        | 0.001361226 | 2.408438006  |
| ENSRNOG00000002433  | G3bp2          | 0.001387969 | 1.887301363  |
| ENSRNOG00000014504  | Il1r1          | 0.001389842 | 2.005706855  |
| ENSRNOG00000059373  | LOC100909548   | 0.001426395 | 2.167839948  |

|                     |                |             |              |
|---------------------|----------------|-------------|--------------|
| ENSRNOG00000015502  | Mfsd14a        | 0.001446968 | 1.833281944  |
| ENSRNOG00000012742  | Irx2           | 0.001460985 | 2.145506096  |
| ENSRNOG00000002781  | Kdsr           | 0.001467008 | 1.525194557  |
| ENSRNOG00000008478  | Mmp13          | 0.001467362 | 2.65819623   |
| ENSRNOG00000019560  | Pde2a          | 0.001487085 | 1.58867519   |
| ENSRNOG00000050337  | AABR07054264.1 | 0.001496738 | -3.370641527 |
| ENSRNOG00000014496  | Coro6          | 0.001502287 | -0.970066565 |
| ENSRNOG00000048818  | Catsperd       | 0.001513277 | -1.529763245 |
| ENSRNOG00000013763  | Erlin2         | 0.001516105 | 1.148919446  |
| ENSRNOG00000016863  | Pnma8b         | 0.001545098 | 2.394683534  |
| ENSRNOG00000010960  | Ankh           | 0.001546015 | 1.71185457   |
| ENSRNOG00000013474  | Cas21          | 0.001549428 | 2.508878588  |
| ENSRNOG00000011363  | Napepld        | 0.001553943 | 2.83684265   |
| ENSRNOG00000004339  | Yy1            | 0.001559301 | 1.686160777  |
| ENSRNOG00000024712  | Insc           | 0.001576647 | -2.43783293  |
| ENSRNOG00000018987  | Crebzf         | 0.001579641 | 2.674745539  |
| ENSRNOG00000020259  | RGD1305347     | 0.001613718 | 1.250318751  |
| ENSRNOG00000031930  | Bin2           | 0.001621099 | -2.169096154 |
| ENSRNOG00000018671  | Commd4         | 0.001621851 | -0.809952155 |
| ENSRNOG00000005758  | Btbd11         | 0.001635835 | 2.990495692  |
| ENSRNOG00000009470  | Flnb           | 0.001652186 | 2.845758726  |
| ENSRNOG00000011552  | Mon1b          | 0.00165349  | 2.335162702  |
| ENSRNOG00000020440  | Fads2          | 0.001654378 | 2.009456732  |
| ENSRNOG000000051720 | Nudc           | 0.00165645  | 3.086408099  |
| ENSRNOG00000049484  | Atp9a          | 0.001666824 | 2.683182902  |
| ENSRNOG00000011007  | Ube2o          | 0.001704621 | 2.969987726  |
| ENSRNOG00000006868  | Ube2z          | 0.001710314 | 2.576460983  |
| ENSRNOG00000014168  | Xylb           | 0.001736981 | -1.066051015 |
| ENSRNOG000000055962 | Bgn            | 0.001788355 | -1.257811828 |
| ENSRNOG00000003736  | Col5a2         | 0.001792125 | -2.299760219 |
| ENSRNOG000000054257 | Adam10         | 0.001824286 | 1.654721213  |
| ENSRNOG00000023492  | Greb1l         | 0.001837784 | 2.610389279  |
| ENSRNOG00000000488  | Hmga1          | 0.001838747 | 3.100400085  |
| ENSRNOG00000004332  | Egfr           | 0.001847304 | 2.045734287  |
| ENSRNOG00000010172  | Mktn3          | 0.001848023 | 2.106860242  |
| ENSRNOG000000055307 | AABR07058886.1 | 0.001858216 | 2.691055209  |
| ENSRNOG00000000175  | Mier2          | 0.001864857 | 2.118243339  |
| ENSRNOG00000017428  | Map1b          | 0.00188205  | -1.4149296   |
| ENSRNOG00000012653  | Ppp1r13b       | 0.001900151 | 2.078823751  |
| ENSRNOG00000021292  | AABR07028027.1 | 0.001904208 | 1.10751477   |
| ENSRNOG00000005616  | Ncoa3          | 0.001909942 | 2.425700746  |
| ENSRNOG00000017231  | Adam9          | 0.001953085 | 1.463806574  |
| ENSRNOG00000008196  | Parp12         | 0.0019552   | 2.452437227  |
| ENSRNOG00000010076  | Pkp1           | 0.002006747 | 1.739602741  |

|                    |                |             |              |
|--------------------|----------------|-------------|--------------|
| ENSRNOG00000047436 | Cabyr          | 0.002047699 | -1.685128544 |
| ENSRNOG00000055293 | Ptprb          | 0.002048096 | 1.764519803  |
| ENSRNOG00000020084 | Pcdhb5         | 0.002060404 | 1.885148334  |
| ENSRNOG00000045884 | Gm25994        | 0.002069235 | 1.745075997  |
| ENSRNOG00000014605 | Lig4           | 0.002084637 | 1.689064988  |
| ENSRNOG00000008051 | Itpk1          | 0.002130503 | 2.076874237  |
| ENSRNOG00000009263 | Ifi27          | 0.002139241 | -0.959256804 |
| ENSRNOG00000007722 | Tlcd3a         | 0.00214115  | 1.114966285  |
| ENSRNOG00000002414 | Tfcp2l1        | 0.002161012 | 1.936330176  |
| ENSRNOG00000005331 | Vapb           | 0.002174361 | 1.705478034  |
| ENSRNOG00000009173 | Smad6          | 0.002206297 | 2.402691658  |
| ENSRNOG00000004425 | Klhdc1         | 0.002215965 | -1.683259244 |
| ENSRNOG00000028460 | Lrrc8e         | 0.002270575 | 3.042114402  |
| ENSRNOG00000018229 | Slc45a1        | 0.00227084  | -2.018833176 |
| ENSRNOG00000058733 | Asap1          | 0.002277152 | 1.174502229  |
| ENSRNOG00000042560 | Bag4           | 0.002277258 | 2.061856726  |
| ENSRNOG00000006144 | Cntn3          | 0.002278107 | 1.34520577   |
| ENSRNOG00000031090 | RT1-CE7        | 0.002290385 | 2.7487834    |
| ENSRNOG00000036742 | Uqcrc2         | 0.002308173 | 1.168672819  |
| ENSRNOG00000050108 | LOC100911319   | 0.002308594 | 3.378744862  |
| ENSRNOG00000026791 | Pgbd5          | 0.002311387 | 2.765475164  |
| ENSRNOG00000060010 | Ss18l1         | 0.002311816 | 3.031954543  |
| ENSRNOG00000028422 | Rmnd5a         | 0.00237342  | 1.664936846  |
| ENSRNOG00000019525 | Hspa9          | 0.002375524 | 1.632663268  |
| ENSRNOG00000030639 | Usp13          | 0.002419907 | -1.090275528 |
| ENSRNOG00000007518 | Nckap1         | 0.002455109 | 0.911524736  |
| ENSRNOG00000047306 | Stap2          | 0.002491367 | 2.667542331  |
| ENSRNOG00000005763 | Arl1           | 0.002511326 | 0.99211442   |
| ENSRNOG00000015676 | Brd9           | 0.00254191  | -0.793447063 |
| ENSRNOG00000021380 | Fads6          | 0.002564356 | 2.957258831  |
| ENSRNOG00000016207 | Galnt1         | 0.002574215 | 1.369582745  |
| ENSRNOG00000009609 | LOC299312      | 0.002592325 | 1.785032907  |
| ENSRNOG00000020995 | Fut1           | 0.002618742 | 1.762364165  |
| ENSRNOG00000016483 | Myo16          | 0.00262008  | 0.968817429  |
| ENSRNOG00000014354 | Cep95          | 0.002620697 | -0.919694293 |
| ENSRNOG00000017307 | Prss23         | 0.002633522 | 0.887288032  |
| ENSRNOG00000028576 | AABR07028446.1 | 0.002653132 | -1.596839241 |
| ENSRNOG00000025811 | Cfp            | 0.002653137 | -0.986126348 |
| ENSRNOG00000007490 | Gabrr2         | 0.002656796 | -4.112375579 |
| ENSRNOG00000043311 | Birc7          | 0.002668141 | -1.165122944 |
| ENSRNOG00000008526 | Pdzd3          | 0.002721484 | -1.247032973 |
| ENSRNOG00000002807 | Septin9        | 0.002733859 | 2.490129997  |
| ENSRNOG00000018677 | Akt2           | 0.002740344 | 2.083371612  |
| ENSRNOG00000015496 | Tpm4           | 0.002778125 | 1.741282633  |

|                     |                |             |              |
|---------------------|----------------|-------------|--------------|
| ENSRNOG00000005176  | Map7d2         | 0.00278733  | -1.507916341 |
| ENSRNOG000000031662 | Slc6a5         | 0.002828189 | 1.144262492  |
| ENSRNOG000000027719 | AABR07068154.1 | 0.002830669 | 3.960965105  |
| ENSRNOG000000057378 | Clec16a        | 0.002841423 | 1.92374998   |
| ENSRNOG000000060723 | AABR07071244.1 | 0.00285722  | 1.647331029  |
| ENSRNOG000000008105 | Dmrta2         | 0.002863677 | 2.788313865  |
| ENSRNOG000000006761 | Sh3gl2         | 0.002870878 | 2.382227674  |
| ENSRNOG000000025509 | Apbb2          | 0.00287209  | 2.126438531  |
| ENSRNOG000000046497 | Brap           | 0.002877073 | 2.163929903  |
| ENSRNOG000000006131 | Mettl2         | 0.002882494 | 1.640231807  |
| ENSRNOG000000018788 | Btbd2          | 0.002911526 | 2.59785921   |
| ENSRNOG000000010448 | Ptbp1          | 0.002955592 | 1.200995828  |
| ENSRNOG000000012394 | Bcl2l13        | 0.003018039 | 2.671068889  |
| ENSRNOG000000016437 | Tm4sf4         | 0.003018562 | 1.014903637  |
| ENSRNOG000000029592 | Srsf11         | 0.003058217 | -1.469859127 |
| ENSRNOG000000028713 | Acvrl1         | 0.003073815 | 1.787446564  |
| ENSRNOG000000014076 | Mbnl1          | 0.003080779 | 1.812190941  |
| ENSRNOG000000009284 | Foxa1          | 0.003104287 | 2.549899873  |
| ENSRNOG000000003234 | Mgrn1          | 0.003118922 | 2.176594588  |
| ENSRNOG000000004747 | Slc30a8        | 0.003129085 | 1.25930873   |
| ENSRNOG000000048580 | Trip6          | 0.003132649 | -0.897023947 |
| ENSRNOG000000013734 | Dnai1          | 0.003162448 | -1.530880079 |
| ENSRNOG000000056768 | AABR07035428.2 | 0.003174596 | -0.979214111 |
| ENSRNOG000000007727 | Lhfpl4         | 0.003189301 | 2.711005933  |
| ENSRNOG000000036813 | #REF!          | 0.003190468 | 1.361048161  |
| ENSRNOG000000005258 | Myef2          | 0.003197979 | 1.186342576  |
| ENSRNOG000000016302 | Cnnm1          | 0.003220381 | 2.261743579  |
| ENSRNOG000000030445 | Ormdl3         | 0.003235617 | 2.323670453  |
| ENSRNOG000000022922 | Slc25a12       | 0.003237121 | 1.34455494   |
| ENSRNOG000000042258 | RGD1561157     | 0.003247457 | 3.417107235  |
| ENSRNOG000000012236 | Hddc3          | 0.003259592 | 1.104000207  |
| ENSRNOG000000008400 | Pml            | 0.003262983 | 2.777346847  |
| ENSRNOG000000048095 | RGD1564801     | 0.003280841 | 1.650133703  |
| ENSRNOG000000048088 | Mest           | 0.003288654 | 1.568824181  |
| ENSRNOG000000020857 | Ppfia1         | 0.003293285 | 2.280219181  |
| ENSRNOG000000019129 | Fcgbp          | 0.003296846 | 1.450225057  |
| ENSRNOG000000025890 | Opa3           | 0.003299717 | 1.97861621   |
| ENSRNOG000000029996 | AABR07054368.1 | 0.003314324 | 1.296789553  |
| ENSRNOG000000006828 | Baz1a          | 0.003344978 | -1.419060222 |
| ENSRNOG000000011705 | Stmn2          | 0.003347395 | -1.048473004 |
| ENSRNOG000000030597 | Ankrd52        | 0.003370894 | 2.092428856  |
| ENSRNOG000000018603 | Carns1         | 0.003370911 | 2.680912481  |
| ENSRNOG000000026435 | Arid3a         | 0.003386952 | 1.723630375  |
| ENSRNOG000000011748 | S100a5         | 0.003401476 | -2.019776645 |



|                    |                |             |              |
|--------------------|----------------|-------------|--------------|
| ENSRNOG00000047257 | Tmem185b       | 0.003430929 | 1.091552079  |
| ENSRNOG00000005766 | Tbc1d20        | 0.003550681 | 2.15057556   |
| ENSRNOG00000005366 | AABR07053472.1 | 0.003603938 | 1.730468265  |
| ENSRNOG00000060005 | Surf4          | 0.003615574 | 1.292443004  |
| ENSRNOG00000012807 | C1qa           | 0.003647058 | 2.199323493  |
| ENSRNOG00000056041 | AABR07062570.1 | 0.003677289 | 1.823314665  |
| ENSRNOG00000007971 | Wbp2           | 0.003679797 | 1.962816304  |
| ENSRNOG00000013963 | #N/A           | 0.003700283 | 2.11733869   |
| ENSRNOG00000056940 | Cited2         | 0.00370282  | 1.004041579  |
| ENSRNOG00000023768 | Rundc1         | 0.003713864 | 2.096830526  |
| ENSRNOG00000023969 | Herc6          | 0.003775412 | -1.39198045  |
| ENSRNOG00000058044 | U6             | 0.003788711 | -2.846791771 |
| ENSRNOG00000060410 | Pcdh1          | 0.003796823 | 1.863839954  |
| ENSRNOG00000013190 | Rnaset2        | 0.003813821 | -0.741585515 |
| ENSRNOG00000057284 | Cenpb          | 0.0038324   | 2.029766882  |
| ENSRNOG00000004783 | Fam171b        | 0.003889275 | 2.271814676  |
| ENSRNOG00000026748 | Dennd2a        | 0.003904832 | -0.868381545 |
| ENSRNOG00000009198 | Rab6b          | 0.003927402 | -0.873647295 |
| ENSRNOG00000027286 | Lrrc75a        | 0.003931536 | 2.852032563  |
| ENSRNOG00000008053 | Atp8a2         | 0.0039396   | 1.376534833  |
| ENSRNOG00000004072 | Myo1c          | 0.003956506 | 2.177033501  |
| ENSRNOG00000003779 | Dedd           | 0.003991114 | 1.1364012    |
| ENSRNOG00000002408 | Rbm47          | 0.004021426 | 2.351790759  |
| ENSRNOG00000004317 | Vipr2          | 0.004037572 | -0.94768655  |
| ENSRNOG00000016976 | Clcn7          | 0.004047691 | 2.612319576  |
| ENSRNOG00000049402 | Nbl1           | 0.004059245 | 1.879662336  |
| ENSRNOG00000022609 | Mrps10         | 0.00407473  | 1.404729536  |
| ENSRNOG00000002191 | LOC498368      | 0.004092721 | 0.946386851  |
| ENSRNOG00000007990 | Adipor2        | 0.004101633 | 1.851680323  |
| ENSRNOG00000019244 | Mxra8          | 0.004140552 | 1.134661042  |
| ENSRNOG00000031643 | Dchs1          | 0.004144718 | 1.613555718  |
| ENSRNOG00000002871 | Rbm25l1        | 0.004159392 | -1.592700675 |
| ENSRNOG00000009577 | Ndst4          | 0.004222111 | -1.569741471 |
| ENSRNOG00000055672 | Gpx2           | 0.004225096 | -2.46054293  |
| ENSRNOG00000055411 | AC128836.1     | 0.004264927 | -1.70628034  |
| ENSRNOG00000017912 | Atp2a3         | 0.004265288 | 1.019634952  |
| ENSRNOG00000020640 | Zbtb7b         | 0.004269088 | 2.409659468  |
| ENSRNOG00000042728 | Fbrs           | 0.004288046 | 2.185645189  |
| ENSRNOG00000020353 | Sh3pxd2a       | 0.004305626 | 2.90158201   |
| ENSRNOG00000006719 | Zfp618         | 0.004306981 | -1.435798463 |
| ENSRNOG00000020073 | Pcdhb8         | 0.004348768 | 2.271122926  |
| ENSRNOG00000057056 | Rab5a          | 0.004349235 | 2.070378876  |
| ENSRNOG00000004111 | Soat1          | 0.004358841 | 1.66186638   |
| ENSRNOG00000022771 | Arhgap23       | 0.004359154 | 2.986131237  |

|                    |                |             |              |
|--------------------|----------------|-------------|--------------|
| ENSRNOG00000010232 | Enpp5          | 0.004362465 | 0.853060023  |
| ENSRNOG00000015888 | Larp4b         | 0.004392973 | 2.159385796  |
| ENSRNOG00000002874 | AABR07065078.1 | 0.00443012  | -1.439843766 |
| ENSRNOG00000019807 | Sufu           | 0.004444051 | 1.919393639  |
| ENSRNOG00000018698 | Wac            | 0.004447815 | 1.135732208  |
| ENSRNOG00000012017 | Otulin         | 0.004468208 | 2.398291188  |
| ENSRNOG00000018824 | Slc7a5         | 0.004476647 | 0.857178375  |
| ENSRNOG00000053859 | Ranbp6         | 0.004494559 | 1.609096569  |
| ENSRNOG00000057290 | Tmem168        | 0.004501049 | 2.079248342  |
| ENSRNOG00000058136 | Vom1r90        | 0.004507171 | -1.830069309 |
| ENSRNOG00000042286 | #N/A           | 0.004545315 | 1.799300156  |
| ENSRNOG00000049633 | Flvcr1         | 0.004557884 | 2.522640494  |
| ENSRNOG00000016472 | Marchf4        | 0.004558675 | 2.513232551  |
| ENSRNOG00000042101 | Zfp93          | 0.004573168 | 1.884949979  |
| ENSRNOG00000013847 | Nova2          | 0.004628492 | 2.056902848  |
| ENSRNOG00000013520 | Mat2a          | 0.004674437 | 0.891969074  |
| ENSRNOG00000020833 | Cspg5          | 0.004692549 | 1.889659398  |
| ENSRNOG00000014751 | Ret            | 0.004709687 | 1.371435719  |
| ENSRNOG00000011599 | Gldc           | 0.004728871 | -1.430174976 |
| ENSRNOG00000009478 | RGD1359108     | 0.004762522 | 2.042601134  |
| ENSRNOG00000032180 | Ccdc15         | 0.004781642 | -2.24688177  |
| ENSRNOG00000059202 | AABR07021988.1 | 0.004783181 | 0.864261007  |
| ENSRNOG00000011026 | Irf2bpl        | 0.004793213 | 1.807265354  |
| ENSRNOG00000003953 | Rab3gap1       | 0.004793741 | 2.029573059  |
| ENSRNOG00000011713 | LOC691113      | 0.004824683 | 2.611785939  |
| ENSRNOG00000059840 | Unc5a          | 0.004855816 | 2.778750487  |
| ENSRNOG00000015936 | LOC108349548   | 0.004870737 | -0.847674785 |
| ENSRNOG00000006860 | Itk            | 0.00488428  | -2.475062351 |
| ENSRNOG00000019639 | Pgpep1         | 0.004892362 | 1.274643222  |
| ENSRNOG00000055082 | Maz            | 0.004905352 | 2.408656804  |
| ENSRNOG00000011518 | Dusp26         | 0.004930813 | -0.782863837 |
| ENSRNOG00000011151 | Tenm4          | 0.004935694 | 2.299212633  |
| ENSRNOG00000010479 | Mycbp2         | 0.004937434 | -1.102269396 |
| ENSRNOG00000018406 | Wipf1          | 0.004940165 | 1.001967456  |
| ENSRNOG00000017265 | #N/A           | 0.00496414  | 1.51372684   |
| ENSRNOG00000003870 | C1qtnf2        | 0.004998866 | 1.791033582  |
| ENSRNOG00000000321 | Cd24           | 0.005033679 | 1.227851033  |
| ENSRNOG00000004678 | Itln1          | 0.005042261 | 0.836377751  |
| ENSRNOG00000029614 | Robo1          | 0.005070155 | 2.469882242  |
| ENSRNOG00000000502 | Def6           | 0.005104742 | 1.070979244  |
| ENSRNOG00000009957 | Slc25a13       | 0.005203483 | 2.190755948  |
| ENSRNOG00000032735 | Srek1          | 0.005229859 | -0.982784419 |
| ENSRNOG00000058132 | SNORD29        | 0.005274824 | 1.134362242  |
| ENSRNOG00000022043 | Yipf2          | 0.005282989 | 1.384351276  |

|                    |                |             |              |
|--------------------|----------------|-------------|--------------|
| ENSRNOG00000019321 | Cck            | 0.005295871 | -0.758785447 |
| ENSRNOG00000019869 | Lrfn1          | 0.005312176 | 2.265877189  |
| ENSRNOG00000032639 | Foxo6          | 0.005347617 | 2.569069214  |
| ENSRNOG00000005291 | Slc38a1        | 0.005363375 | 1.053469535  |
| ENSRNOG00000037227 | Yes1           | 0.005373305 | 2.175449049  |
| ENSRNOG00000013959 | Skor1          | 0.005389297 | 2.379914364  |
| ENSRNOG00000062228 | LOC100359515   | 0.0054061   | -2.262490827 |
| ENSRNOG00000028206 | Pheta1         | 0.005458825 | 2.855432001  |
| ENSRNOG00000003143 | RGD1310166     | 0.005545438 | 1.356946107  |
| ENSRNOG00000008065 | Wwc1           | 0.005563791 | 2.320665151  |
| ENSRNOG00000002176 | Nectin3        | 0.005585745 | 1.236368604  |
| ENSRNOG00000024578 | Ttyh2          | 0.005599297 | 2.607840444  |
| ENSRNOG00000037080 | Adamts17       | 0.005601918 | 1.88564959   |
| ENSRNOG00000062146 | AC119762.7     | 0.005636858 | -1.723669375 |
| ENSRNOG00000007792 | Gcc1           | 0.005671368 | 1.455729029  |
| ENSRNOG00000002142 | Cds1           | 0.005675994 | 1.934551548  |
| ENSRNOG00000001111 | Brca2          | 0.005686904 | -0.837190105 |
| ENSRNOG00000000073 | Tmed5          | 0.005713518 | 2.332953951  |
| ENSRNOG00000011922 | Stt3b          | 0.005719048 | 1.304676988  |
| ENSRNOG00000020990 | Fgf21          | 0.005770095 | -1.80826333  |
| ENSRNOG00000046183 | AABR07055280.1 | 0.005804457 | 1.992074602  |
| ENSRNOG00000015068 | Il11ra1        | 0.005822012 | -1.535723857 |
| ENSRNOG00000043023 | Msmg           | 0.005841967 | 1.93123427   |
| ENSRNOG00000014235 | Zgpat          | 0.005882095 | 1.512323506  |
| ENSRNOG00000024886 | Ext1           | 0.005979357 | -0.948078213 |
| ENSRNOG00000020350 | Pacs1          | 0.006083781 | 2.116828893  |
| ENSRNOG00000028569 | Arhgap27       | 0.006106998 | 2.940537255  |
| ENSRNOG00000007224 | Bmt2           | 0.006112733 | 1.999176463  |
| ENSRNOG00000024595 | Cers6          | 0.006138612 | 1.242114324  |
| ENSRNOG00000014723 | Cbfa2t3        | 0.006144242 | 1.996783485  |
| ENSRNOG00000017108 | Syng1          | 0.006153254 | 2.251100852  |
| ENSRNOG00000026186 | Syde2          | 0.006159019 | 2.179232449  |
| ENSRNOG00000050111 | Cenpo          | 0.006197678 | 2.281739581  |
| ENSRNOG00000007354 | Trpa1          | 0.006228173 | 1.71464622   |
| ENSRNOG00000003562 | Susd4          | 0.006265037 | -0.880933815 |
| ENSRNOG00000020743 | Cyp2s1         | 0.006266586 | 1.109537821  |
| ENSRNOG00000008354 | Slc9a8         | 0.006286769 | 2.347381276  |
| ENSRNOG00000012329 | Saraf          | 0.006290825 | 0.836050614  |
| ENSRNOG00000009113 | Marcks1        | 0.006299701 | 2.373201237  |
| ENSRNOG00000020357 | Msto1          | 0.006304075 | 2.611621384  |
| ENSRNOG00000016885 | Klf6           | 0.006319483 | -0.898611902 |
| ENSRNOG00000000665 | Pitpnb         | 0.006326659 | 1.267235929  |
| ENSRNOG00000056559 | AABR07034669.1 | 0.006328786 | 1.777989551  |
| ENSRNOG00000001351 | Trafd1         | 0.006348245 | -0.741195235 |

|                    |                |             |              |
|--------------------|----------------|-------------|--------------|
| ENSRNOG00000018378 | Cacnb2         | 0.006443364 | 1.212093949  |
| ENSRNOG00000006718 | Rbm33          | 0.006489957 | 1.903662673  |
| ENSRNOG00000050437 | Bod1l1         | 0.006509743 | -1.211304677 |
| ENSRNOG00000032009 | #N/A           | 0.006528216 | -2.360287713 |
| ENSRNOG00000023053 | Ice1           | 0.006540246 | 1.594705049  |
| ENSRNOG00000004555 | Sec14l4        | 0.006583825 | 2.122356915  |
| ENSRNOG00000059720 | Syp            | 0.006595334 | 1.999143123  |
| ENSRNOG00000011431 | Mfhas1         | 0.006629918 | 2.037674041  |
| ENSRNOG00000015035 | Myo7b          | 0.006679868 | 1.244041113  |
| ENSRNOG00000015230 | Ermard         | 0.006756243 | -1.035509429 |
| ENSRNOG00000008218 | Atp6v0e2       | 0.006758934 | 1.583538217  |
| ENSRNOG00000057622 | Rbm41          | 0.006766174 | -1.586847126 |
| ENSRNOG00000032215 | Cdyl           | 0.006776663 | 1.964951636  |
| ENSRNOG00000051272 | AABR07045350.1 | 0.006782068 | -0.958321946 |
| ENSRNOG00000000299 | Foxo3          | 0.006784725 | 2.200441707  |
| ENSRNOG00000037446 | Pxmp2          | 0.006861504 | -1.185785706 |
| ENSRNOG00000010889 | Fbxw7          | 0.006867379 | -1.372726361 |
| ENSRNOG00000054008 | Scamp5         | 0.006891394 | 1.449564261  |
| ENSRNOG00000015825 | Aurkc          | 0.006975243 | -0.840843242 |
| ENSRNOG00000006327 | Rcc2           | 0.006978786 | 2.397133489  |
| ENSRNOG00000003268 | Maml1          | 0.006995101 | 1.683163882  |
| ENSRNOG00000028892 | Prr36          | 0.007001177 | 1.593515216  |
| ENSRNOG00000001335 | Zkscan1        | 0.00701708  | 1.722245445  |
| ENSRNOG00000060599 | Gabrb3         | 0.007039986 | 1.31255322   |
| ENSRNOG00000013774 | Lmnbl          | 0.007108965 | 1.584048286  |
| ENSRNOG00000012802 | Tenm3          | 0.00716127  | 2.062554616  |
| ENSRNOG00000054218 | Il18rap        | 0.007199541 | -1.560185397 |
| ENSRNOG00000006353 | #N/A           | 0.007224417 | 0.939683813  |
| ENSRNOG00000017500 | Mtss2          | 0.007239062 | 2.304167879  |
| ENSRNOG00000001347 | Adam1a         | 0.00727945  | -0.933393198 |
| ENSRNOG00000020087 | Zfp90          | 0.007286469 | -0.991877049 |
| ENSRNOG00000018554 | AABR07026797.1 | 0.007307586 | 1.390310034  |
| ENSRNOG00000054557 | Lsm14b         | 0.007348042 | 2.057893813  |
| ENSRNOG00000004498 | Scin           | 0.007368812 | 1.323351428  |
| ENSRNOG00000049785 | Ranbp3         | 0.007401286 | 2.174175803  |
| ENSRNOG00000008424 | Aagab          | 0.007466306 | 2.043266781  |
| ENSRNOG00000046973 | Tmco3          | 0.007475013 | 0.977960702  |
| ENSRNOG00000033220 | Oas1f          | 0.007479451 | -0.981833684 |
| ENSRNOG00000045918 | #N/A           | 0.007497172 | 1.810471386  |
| ENSRNOG00000030019 | Atp1a1         | 0.007506331 | 1.093854569  |
| ENSRNOG00000024241 | Cdc23          | 0.007508154 | 1.431315563  |
| ENSRNOG00000008075 | Ift74          | 0.007551014 | -1.331329529 |
| ENSRNOG00000025184 | Prss35         | 0.007557286 | -2.379984546 |
| ENSRNOG00000004377 | Lpin1          | 0.007572935 | 2.072777072  |

|                    |                |             |              |
|--------------------|----------------|-------------|--------------|
| ENSRNOG00000061763 | AABR07012039.1 | 0.007579254 | -3.158315886 |
| ENSRNOG00000031665 | Ace2           | 0.007581342 | -1.850495441 |
| ENSRNOG00000025216 | Alkbh6         | 0.007624572 | -1.75336666  |
| ENSRNOG00000050655 | P4ha1          | 0.007631117 | 0.937525854  |
| ENSRNOG00000019189 | Acat2          | 0.007632519 | 1.795476683  |
| ENSRNOG00000022337 | Slitrk6        | 0.007653364 | -1.113232891 |
| ENSRNOG00000020021 | Brsk2          | 0.007681201 | 2.237202473  |
| ENSRNOG00000004122 | Kremen2        | 0.007728075 | 1.262295094  |
| ENSRNOG00000016585 | Bmi1           | 0.007731756 | 2.03349744   |
| ENSRNOG00000027220 | Pcdhgb8        | 0.007752006 | 2.066589881  |
| ENSRNOG00000000873 | Brs3           | 0.007756709 | -2.27336946  |
| ENSRNOG00000022288 | Pafah2         | 0.007759828 | 1.899200656  |
| ENSRNOG00000025164 | Bhlha15        | 0.007783212 | 1.210662027  |
| ENSRNOG00000056837 | Abr            | 0.007968245 | 1.966114264  |
| ENSRNOG00000004757 | Tmem158        | 0.007976815 | 1.752243791  |
| ENSRNOG00000001224 | Itgb2          | 0.00798455  | 0.794171719  |
| ENSRNOG00000014420 | Rap2b          | 0.008003378 | 2.590744896  |
| ENSRNOG00000019433 | Rab3a          | 0.008011238 | 1.441026545  |
| ENSRNOG00000052918 | AABR07035802.1 | 0.008098178 | -1.378458065 |
| ENSRNOG00000054548 | Srpk3          | 0.008152834 | -1.078227745 |
| ENSRNOG00000016245 | Neto2          | 0.008179224 | 1.24579011   |
| ENSRNOG00000029738 | Diras1         | 0.008200128 | 1.960763305  |
| ENSRNOG00000002818 | Eftud2         | 0.008214644 | 1.520411907  |
| ENSRNOG00000024470 | #N/A           | 0.00822107  | 0.77045371   |
| ENSRNOG00000028658 | Olig2          | 0.008302012 | 1.675454762  |
| ENSRNOG00000056213 | AC130741.1     | 0.008326399 | -1.275264477 |
| ENSRNOG00000052096 | Cox11          | 0.008334766 | 1.76858943   |
| ENSRNOG00000019662 | Tm6sf1         | 0.00836175  | 1.03995419   |
| ENSRNOG00000024345 | Pard3b         | 0.008386395 | -1.563497248 |
| ENSRNOG00000026914 | Dnah1          | 0.008388079 | -1.111813035 |
| ENSRNOG00000052574 | AABR07021955.1 | 0.008388179 | 1.517486664  |
| ENSRNOG00000019697 | Ankrd28        | 0.008388764 | 1.4449934    |
| ENSRNOG00000018363 | Hectd3         | 0.008515494 | 2.121242226  |
| ENSRNOG00000000748 | AABR07044273.1 | 0.00856318  | 2.13141558   |
| ENSRNOG00000009746 | Akap17b        | 0.00862552  | -1.150758683 |
| ENSRNOG00000029500 | Tapbp          | 0.008635446 | 1.903041779  |
| ENSRNOG00000029893 | Rwdd3          | 0.008642392 | -1.156884828 |
| ENSRNOG00000052745 | Met            | 0.008646738 | 1.518793194  |
| ENSRNOG00000022623 | Ttll12         | 0.008647635 | 1.969640757  |
| ENSRNOG00000032178 | Cenpa          | 0.008649953 | 1.791720084  |
| ENSRNOG00000013642 | Lrrc41         | 0.008653746 | 1.272705508  |
| ENSRNOG00000030127 | Eml2           | 0.008685751 | 1.26942128   |
| ENSRNOG00000010457 | Vash1          | 0.008714255 | 2.213054285  |
| ENSRNOG00000048660 | Haspin         | 0.008718148 | 0.954734703  |

|                    |                |             |              |
|--------------------|----------------|-------------|--------------|
| ENSRNOG00000011624 | Kcnq2          | 0.008746953 | 2.031607276  |
| ENSRNOG00000012503 | Dnajc16        | 0.008747668 | 2.459428172  |
| ENSRNOG00000060395 | AABR07025301.1 | 0.008768974 | 2.168918739  |
| ENSRNOG00000008455 | Tmem87a        | 0.008835358 | 1.248125873  |
| ENSRNOG00000023520 | Cs             | 0.008840331 | 1.327540777  |
| ENSRNOG00000008372 | Vamp7          | 0.008854629 | 1.017592434  |
| ENSRNOG00000037199 | Spink8         | 0.008878906 | -1.447300547 |
| ENSRNOG00000003326 | Rrn3           | 0.008883634 | 1.099310749  |
| ENSRNOG00000054614 | AABR07002779.1 | 0.008946151 | 2.268462421  |
| ENSRNOG00000055936 | Trnp1          | 0.008960791 | 2.820837091  |
| ENSRNOG00000048431 | Nynrin         | 0.008978773 | 2.865532424  |
| ENSRNOG00000050547 | Syngt2         | 0.009013413 | 1.570940487  |
| ENSRNOG00000025757 | Myh6           | 0.009041974 | 1.975118269  |
| ENSRNOG00000057934 | Tmx1           | 0.009054889 | 0.949004671  |
| ENSRNOG00000028215 | Nup160         | 0.00905685  | 1.845675185  |
| ENSRNOG00000014834 | #N/A           | 0.009101552 | 1.304315802  |
| ENSRNOG00000011402 | Isg20l2        | 0.009110229 | 1.388429012  |
| ENSRNOG00000009724 | Tstd2          | 0.009191881 | 1.693558878  |
| ENSRNOG00000007418 | Ipo9           | 0.009199896 | 1.422431014  |
| ENSRNOG00000002246 | Slc30a9        | 0.009200867 | 1.117156954  |
| ENSRNOG00000012878 | Atp7b          | 0.00921022  | 2.115966155  |
| ENSRNOG00000016818 | Fgfr3          | 0.009253959 | 1.874148464  |
| ENSRNOG00000007246 | Atxn7          | 0.009276575 | 1.69520119   |
| ENSRNOG00000005434 | Sptbn1         | 0.009293645 | 1.744058765  |
| ENSRNOG00000006298 | Cpne3          | 0.009305012 | 1.288781403  |
| ENSRNOG00000020014 | Myh14          | 0.009396984 | 1.858253346  |
| ENSRNOG00000019063 | Fbxo38         | 0.009402568 | 0.950307941  |
| ENSRNOG00000002546 | Rchy1          | 0.009430644 | 0.981121517  |
| ENSRNOG00000050500 | Tob2           | 0.009462888 | 1.900243089  |
| ENSRNOG00000007189 | Ttc22          | 0.009487236 | 1.45254243   |
| ENSRNOG00000014233 | Krt19          | 0.009499562 | 2.075323147  |
| ENSRNOG00000013570 | Rad54l2        | 0.009507798 | 1.811715219  |
| ENSRNOG00000001474 | Tmem270        | 0.009534908 | -1.175278702 |
| ENSRNOG00000007054 | Dhx33          | 0.0096096   | 2.544920617  |
| ENSRNOG00000010176 | Map2k1         | 0.009612203 | 0.814326605  |
| ENSRNOG00000025864 | LOC108348120   | 0.009616925 | 2.323868143  |
| ENSRNOG00000008652 | Phip           | 0.009656696 | -1.860871628 |
| ENSRNOG00000007512 | Srp14          | 0.009667708 | 2.737755471  |
| ENSRNOG00000020532 | Kcnq1          | 0.00969657  | 1.442587331  |
| ENSRNOG00000010827 | Ptbp2          | 0.009713187 | 1.288941439  |
| ENSRNOG00000049334 | Atp2c2         | 0.009763571 | 1.364228536  |
| ENSRNOG00000005276 | Csnk2a1        | 0.00977574  | 1.448557224  |
| ENSRNOG00000046445 | Rcor3          | 0.009845157 | 2.164530825  |
| ENSRNOG00000001164 | Tff1           | 0.00989041  | -1.243622819 |

|                    |                |             |              |
|--------------------|----------------|-------------|--------------|
| ENSRNOG00000046460 | AABR07022144.1 | 0.009893744 | -1.120076409 |
| ENSRNOG00000013973 | Lcn2           | 0.009897614 | -1.498932292 |
| ENSRNOG00000015878 | Pif1           | 0.009928161 | 2.763017139  |
| ENSRNOG00000000728 | Clic2          | 0.010085506 | 2.155520362  |
| ENSRNOG00000011290 | Tm2d3          | 0.010141407 | 0.998605131  |
| ENSRNOG00000027151 | Lrrc58         | 0.010159441 | 2.249239931  |
| ENSRNOG00000012346 | Epb41l2        | 0.010166221 | 1.954561601  |
| ENSRNOG00000046500 | Irgq           | 0.010187866 | 2.693791498  |
| ENSRNOG00000017032 | Atp5f1a        | 0.010225054 | 0.896099379  |
| ENSRNOG00000005413 | Creb3l1        | 0.010252458 | 0.867211929  |
| ENSRNOG00000031285 | AABR07064305.1 | 0.0103383   | 1.195142499  |
| ENSRNOG00000039976 | Ptk7           | 0.010338587 | 2.540241667  |
| ENSRNOG00000032048 | Zfp462         | 0.010501978 | 0.834822217  |
| ENSRNOG00000029799 | Tomm34         | 0.010504427 | 0.865415554  |
| ENSRNOG00000013679 | Sema4d         | 0.010545213 | 1.81705654   |
| ENSRNOG00000021902 | Rmi2           | 0.010563396 | 2.776167354  |
| ENSRNOG00000001083 | Kdelr2         | 0.010620713 | 0.800305258  |
| ENSRNOG00000021118 | Nomo1          | 0.010677706 | 0.948850908  |
| ENSRNOG00000014343 | Anln           | 0.010717947 | 1.594677988  |
| ENSRNOG00000023410 | Apol9a         | 0.010758354 | -0.883700361 |
| ENSRNOG00000011509 | Agk            | 0.010759006 | 1.383308892  |
| ENSRNOG00000008616 | Ubr3           | 0.010762679 | 1.265263574  |
| ENSRNOG00000059362 | Has3           | 0.010778285 | -0.899073421 |
| ENSRNOG00000028063 | Tmem38b        | 0.01093001  | 0.822040738  |
| ENSRNOG00000003929 | Pcdh19         | 0.010947552 | -1.248034974 |
| ENSRNOG00000010697 | Hadh           | 0.01095219  | 1.420347786  |
| ENSRNOG00000045740 | Tmx3           | 0.010995067 | 1.194768979  |
| ENSRNOG00000031590 | AABR07048308.2 | 0.010997852 | 1.302703151  |
| ENSRNOG00000005165 | Smcr8          | 0.011027388 | 1.931659509  |
| ENSRNOG00000028208 | Mief2          | 0.011038142 | 2.390211578  |
| ENSRNOG00000047799 | Gnb5           | 0.011070509 | 1.664440963  |
| ENSRNOG00000026171 | Bbs4           | 0.011122396 | -0.836145361 |
| ENSRNOG00000032522 | B630019K06Rik  | 0.011158757 | 2.363143181  |
| ENSRNOG00000055391 | Eif4ebp2       | 0.011162277 | 1.616761389  |
| ENSRNOG00000025580 | LOC100912618   | 0.011195305 | 1.319386292  |
| ENSRNOG00000013802 | Slc25a36       | 0.011236353 | 1.511582714  |
| ENSRNOG00000045920 | Mcu            | 0.011290567 | 1.449027333  |
| ENSRNOG00000013196 | Dok5           | 0.011302077 | 0.906693223  |
| ENSRNOG00000009419 | Ptprg          | 0.011332174 | 1.883278513  |
| ENSRNOG00000060936 | Ikbkg          | 0.011337257 | 1.971384688  |
| ENSRNOG00000017856 | Fev            | 0.011381675 | -0.780528525 |
| ENSRNOG00000014872 | Sec24d         | 0.011419564 | 1.105313064  |
| ENSRNOG00000020080 | Lrrc18         | 0.011457011 | -2.292124412 |
| ENSRNOG00000012356 | Slc36a1        | 0.011497467 | 1.818499691  |

|                    |                |             |              |
|--------------------|----------------|-------------|--------------|
| ENSRNOG00000018873 | Fam168a        | 0.011511457 | 1.529292416  |
| ENSRNOG00000001823 | St6gal1        | 0.011525546 | -0.892538579 |
| ENSRNOG00000030180 | Lrrc10b        | 0.011563748 | 1.994087004  |
| ENSRNOG00000018840 | Rnf40          | 0.011579874 | 1.980906844  |
| ENSRNOG00000015735 | Zswim1         | 0.01159182  | 1.488671647  |
| ENSRNOG00000001198 | Fam222a        | 0.011610438 | 2.768227052  |
| ENSRNOG00000033101 | Myo18a         | 0.011640546 | 1.794503077  |
| ENSRNOG00000006003 | Ctnna2         | 0.011647533 | 1.664581046  |
| ENSRNOG00000054907 | AABR07012100.2 | 0.011732646 | -2.219373233 |
| ENSRNOG00000055281 | Dcbld2         | 0.01181788  | 1.503313078  |
| ENSRNOG00000033734 | Tnnt2          | 0.011867274 | 1.757776585  |
| ENSRNOG00000020875 | Celf3          | 0.011904832 | 1.789829562  |
| ENSRNOG00000010208 | Timp1          | 0.011920739 | -1.57621572  |
| ENSRNOG00000014241 | Ece1           | 0.011933655 | 1.731096416  |
| ENSRNOG00000002680 | Lamc1          | 0.011999716 | 1.515363247  |
| ENSRNOG00000011511 | Stk24          | 0.011999995 | 1.712415247  |
| ENSRNOG00000028534 | Zfp518b        | 0.012015363 | 2.197828105  |
| ENSRNOG00000018798 | Bcan           | 0.012049879 | 1.999354706  |
| ENSRNOG00000020095 | Pcdhb3         | 0.012066707 | 1.302150175  |
| ENSRNOG00000028611 | AABR07037203.1 | 0.012187529 | 0.897516153  |
| ENSRNOG00000024201 | Fer1l5         | 0.012203587 | -0.879581496 |
| ENSRNOG00000012002 | lqgap1         | 0.012219725 | 1.439888433  |
| ENSRNOG00000001868 | LOC100911248   | 0.012288068 | 1.590530252  |
| ENSRNOG00000059683 | Mpp2           | 0.012291452 | 2.517568109  |
| ENSRNOG00000003614 | Mgat5          | 0.012327224 | 1.702756498  |
| ENSRNOG00000048462 | AABR07066529.1 | 0.012332322 | 1.736235156  |
| ENSRNOG00000001582 | Bach1          | 0.012376697 | 2.572934557  |
| ENSRNOG00000000529 | Pim1           | 0.01239817  | 2.592263966  |
| ENSRNOG00000024482 | Tnrc18         | 0.012398951 | 2.130458028  |
| ENSRNOG00000015501 | Ddhd2          | 0.012430283 | 1.593116609  |
| ENSRNOG00000004217 | Stk10          | 0.012507196 | 2.449656922  |
| ENSRNOG00000007906 | Bub1b          | 0.0126551   | 1.192143037  |
| ENSRNOG00000029778 | Maob           | 0.012659606 | 1.2459836    |
| ENSRNOG00000023400 | Dtx3l          | 0.012722937 | 1.506867304  |
| ENSRNOG00000016050 | Fgfr1          | 0.012746675 | 1.850983088  |
| ENSRNOG00000030704 | AC094053.1     | 0.012861066 | 1.413993919  |
| ENSRNOG00000017225 | Fam160b1       | 0.012899447 | 1.750195235  |
| ENSRNOG00000048929 | AABR07044389.1 | 0.012908626 | 2.477529426  |
| ENSRNOG00000014844 | Kif21a         | 0.012937815 | 1.443238913  |
| ENSRNOG00000008244 | LOC690035      | 0.012942349 | -0.810941042 |
| ENSRNOG00000057754 | Tcf12          | 0.013003102 | 1.94306648   |
| ENSRNOG00000006787 | Dhcr24         | 0.013016124 | 1.226792271  |
| ENSRNOG00000002524 | Gpr37          | 0.013028535 | 1.064747929  |
| ENSRNOG00000018958 | Mt3            | 0.013033614 | -0.864277411 |



|                    |                 |             |              |
|--------------------|-----------------|-------------|--------------|
| ENSRNOG00000042326 | Smpdl3b         | 0.013140544 | 1.964907176  |
| ENSRNOG00000014505 | Pmfbp1          | 0.013160993 | -1.741014884 |
| ENSRNOG00000008837 | Ass1            | 0.013204074 | 0.931256891  |
| ENSRNOG00000006770 | Brd4            | 0.013222104 | -1.080027541 |
| ENSRNOG00000048145 | Sstr1           | 0.013284253 | 1.346177789  |
| ENSRNOG00000060775 | Lmo7            | 0.013352057 | 1.24631721   |
| ENSRNOG00000013441 | Gnrh1           | 0.013374639 | -1.566271993 |
| ENSRNOG00000060146 | Six5            | 0.013375502 | 2.652442215  |
| ENSRNOG00000006889 | Ambp            | 0.013394501 | -0.797304163 |
| ENSRNOG00000062252 | AABR07072853.5  | 0.013602614 | 1.472675992  |
| ENSRNOG00000009163 | Fam133b         | 0.013629749 | -1.328247486 |
| ENSRNOG00000003551 | B4galt3         | 0.013652719 | 0.985669575  |
| ENSRNOG00000058662 | Ano8            | 0.013657424 | 2.332803314  |
| ENSRNOG00000008145 | Traf3           | 0.013660225 | 1.57853888   |
| ENSRNOG00000030579 | AC126572.2      | 0.013692426 | 2.699271289  |
| ENSRNOG00000049162 | Prr15l          | 0.0137219   | 3.045948903  |
| ENSRNOG00000024813 | Mzt1            | 0.013743452 | 2.463393962  |
| ENSRNOG00000014186 | Zswim9          | 0.013784732 | 1.348059528  |
| ENSRNOG00000001252 | Chst12          | 0.013832373 | 1.268433167  |
| ENSRNOG00000008291 | Thumpd2         | 0.013848367 | -0.789967262 |
| ENSRNOG00000020873 | Nphs1           | 0.013865861 | -1.830760051 |
| ENSRNOG00000004263 | Ints7           | 0.013871904 | 1.141846808  |
| ENSRNOG00000052386 | Nlr1            | 0.01390071  | 1.92439862   |
| ENSRNOG00000001593 | Ln timer        | 0.013910456 | 0.90203097   |
| ENSRNOG00000007315 | Thoc2           | 0.013934089 | -1.621909124 |
| ENSRNOG00000059962 | AABR07025787.1  | 0.013961983 | 1.206627834  |
| ENSRNOG00000000064 | Atp5me          | 0.013977579 | -0.875379497 |
| ENSRNOG00000003049 | Hsd17b10        | 0.014014848 | 2.33096684   |
| ENSRNOG00000030149 | Adgrl3          | 0.014021726 | 1.065373479  |
| ENSRNOG00000000145 | Pik3r3          | 0.014038218 | 1.481931176  |
| ENSRNOG00000000657 | Nek7            | 0.014091962 | 1.969682285  |
| ENSRNOG00000000483 | Syngap1         | 0.014104391 | 2.359111418  |
| ENSRNOG00000024213 | Golim4          | 0.014135517 | 1.659572197  |
| ENSRNOG00000005902 | Ccdc34          | 0.014179171 | -1.551409257 |
| ENSRNOG00000005814 | NEWGENE_1582771 | 0.014201395 | 1.139343854  |
| ENSRNOG00000020694 | Icam5           | 0.014206173 | 1.878845703  |
| ENSRNOG00000020435 | Terf2           | 0.014224193 | 1.228537637  |
| ENSRNOG00000013930 | Rnf4            | 0.014305401 | 1.048266095  |
| ENSRNOG00000020663 | Pygo2           | 0.014316487 | 1.135003409  |
| ENSRNOG00000062283 | AABR07003492.2  | 0.014366254 | 2.186516836  |
| ENSRNOG00000061434 | AC128293.1      | 0.014396141 | -1.781726386 |
| ENSRNOG00000019298 | Dctn4           | 0.014418815 | 1.572904162  |
| ENSRNOG00000003948 | Llg1            | 0.014436456 | 1.95962371   |
| ENSRNOG00000052140 | Ogg1            | 0.014444855 | 1.144093318  |

|                    |                |             |              |
|--------------------|----------------|-------------|--------------|
| ENSRNOG00000008625 | Rimkla         | 0.014472968 | 1.324551247  |
| ENSRNOG00000059094 | U6             | 0.014486377 | -3.21337906  |
| ENSRNOG00000005916 | Ppm1a          | 0.014501313 | 0.789261482  |
| ENSRNOG00000001342 | Wdr66          | 0.014557951 | -0.946974486 |
| ENSRNOG00000020349 | Rab3il1        | 0.014578203 | 1.916315939  |
| ENSRNOG00000046790 | AABR07040887.1 | 0.014738223 | -1.225589621 |
| ENSRNOG00000018358 | Nt5dc2         | 0.014803934 | 1.146450996  |
| ENSRNOG00000008706 | Tbx3           | 0.014860285 | 1.50967363   |
| ENSRNOG00000059116 | AABR07035818.1 | 0.014931348 | 1.501770973  |
| ENSRNOG00000030830 | #N/A           | 0.014952467 | 0.997922359  |
| ENSRNOG00000056040 | AABR07045680.1 | 0.014952732 | -1.274676881 |
| ENSRNOG00000048843 | Tsfm           | 0.015040138 | 1.636780539  |
| ENSRNOG00000046905 | Sgce           | 0.015065679 | 1.247182194  |
| ENSRNOG00000026277 | Zc3h6          | 0.015070226 | -1.052120844 |
| ENSRNOG00000020424 | Plpp4          | 0.015074198 | -0.961426126 |
| ENSRNOG00000013323 | Rnf217         | 0.015085733 | 1.206536178  |
| ENSRNOG00000020478 | Camk4          | 0.015088864 | -1.122023099 |
| ENSRNOG00000032813 | Mdc1           | 0.015097262 | 1.702168208  |
| ENSRNOG00000024243 | Cadm4          | 0.015114509 | 2.134266633  |
| ENSRNOG00000031974 | Pcdh10         | 0.015166069 | 1.662307717  |
| ENSRNOG00000029304 | Aggf1          | 0.015267032 | 1.313062402  |
| ENSRNOG00000015576 | Hsdl1          | 0.015317833 | 1.460383079  |
| ENSRNOG00000013844 | Fam172a        | 0.015324814 | 2.051358586  |
| ENSRNOG00000008862 | Abcg4          | 0.015344805 | 2.587130307  |
| ENSRNOG00000060359 | AABR07032751.1 | 0.015349082 | 1.524362933  |
| ENSRNOG00000013670 | Pax3           | 0.015379728 | 2.398963444  |
| ENSRNOG00000031544 | Larp1          | 0.015389069 | 1.502844569  |
| ENSRNOG00000010497 | RGD1305807     | 0.015390353 | -0.754043156 |
| ENSRNOG00000032590 | Ttc28          | 0.015445342 | -1.003558021 |
| ENSRNOG00000046207 | Cbx4           | 0.01550074  | 1.983416633  |
| ENSRNOG00000014785 | Ykt6           | 0.015500948 | 0.902078239  |
| ENSRNOG00000062168 | AC119762.8     | 0.015628487 | -1.390064796 |
| ENSRNOG00000059374 | AABR07024457.1 | 0.015664767 | -2.250995634 |
| ENSRNOG00000020860 | Tdrkh          | 0.015671309 | -0.781585564 |
| ENSRNOG00000003759 | Galc           | 0.015752337 | 1.530303197  |
| ENSRNOG00000020417 | Gsk3a          | 0.01575242  | 1.294356373  |
| ENSRNOG00000020466 | Apba3          | 0.015850765 | 2.292232792  |
| ENSRNOG00000001250 | Lfng           | 0.015892881 | 1.467390423  |
| ENSRNOG00000012333 | Kbtbd11        | 0.015908953 | 1.626535099  |
| ENSRNOG00000024905 | Drc1           | 0.015912186 | -0.753376041 |
| ENSRNOG00000029726 | Gstm1          | 0.015955713 | -1.156656817 |
| ENSRNOG00000047454 | AABR07054716.1 | 0.015959715 | -1.70872617  |
| ENSRNOG00000011975 | Crtc3          | 0.015990048 | 1.828729407  |
| ENSRNOG00000011476 | Nars2          | 0.015995498 | 1.397291335  |

|                    |                |             |              |
|--------------------|----------------|-------------|--------------|
| ENSRNOG00000007725 | Mis12          | 0.01607649  | 1.722984033  |
| ENSRNOG00000047734 | Chst2          | 0.016125047 | 1.545914913  |
| ENSRNOG00000018690 | Rgs17          | 0.016173617 | -1.005051753 |
| ENSRNOG00000014851 | Col4a4         | 0.016187679 | -0.934167276 |
| ENSRNOG00000012629 | Rab23          | 0.016208374 | 0.989099592  |
| ENSRNOG00000014712 | Zfp39          | 0.016252575 | -1.898772991 |
| ENSRNOG00000016246 | Tshz1          | 0.016273128 | 2.085159109  |
| ENSRNOG00000016254 | Sema4c         | 0.016320749 | 0.875885186  |
| ENSRNOG00000032183 | Scmh1          | 0.016348914 | 1.65918577   |
| ENSRNOG00000016935 | Mapk1ip1       | 0.016364983 | -0.872140905 |
| ENSRNOG00000049033 | Racgap1        | 0.016370824 | 1.237088207  |
| ENSRNOG00000028279 | Tex52          | 0.016425107 | -0.949303261 |
| ENSRNOG00000043099 | Ddx21          | 0.016475531 | 1.076309267  |
| ENSRNOG00000023816 | Aph1a          | 0.016489662 | 0.873777585  |
| ENSRNOG00000009152 | Caprin1        | 0.016512    | 0.784637484  |
| ENSRNOG00000023226 | S100a10        | 0.016602971 | -0.983464266 |
| ENSRNOG00000056941 | AABR07066529.3 | 0.016637951 | -1.008963712 |
| ENSRNOG00000026458 | Tbccd1         | 0.016697352 | 1.452167188  |
| ENSRNOG00000008622 | Creb5          | 0.016777384 | -2.186153061 |
| ENSRNOG00000001255 | Mlxip          | 0.01677786  | 1.755970882  |
| ENSRNOG00000011847 | Grk4           | 0.016849014 | -0.911046926 |
| ENSRNOG00000055597 | Hdac7          | 0.016862322 | 2.349277531  |
| ENSRNOG00000011157 | Jak1           | 0.016868326 | 0.953380583  |
| ENSRNOG00000034233 | Fyttd1         | 0.016890705 | 1.117149651  |
| ENSRNOG00000058156 | Zdhhc18        | 0.016909383 | 1.559782014  |
| ENSRNOG00000018646 | Hbegf          | 0.016917265 | -0.831000873 |
| ENSRNOG00000019518 | Pde4c          | 0.016929031 | 1.879520358  |
| ENSRNOG00000023465 | Depp1          | 0.016955797 | -1.649597225 |
| ENSRNOG00000005438 | Pcsk2          | 0.016980767 | 0.773580928  |
| ENSRNOG00000015124 | Gpam           | 0.017002554 | 1.727836525  |
| ENSRNOG00000025060 | Nanos1         | 0.017012209 | 1.953640021  |
| ENSRNOG00000000500 | Scube3         | 0.017025783 | -1.1846144   |
| ENSRNOG00000019482 | Gnao1          | 0.017042861 | 1.110390836  |
| ENSRNOG00000027770 | Trpm3          | 0.017048531 | 1.23639787   |
| ENSRNOG00000043364 | Zfp362         | 0.017103726 | 1.694028583  |
| ENSRNOG00000047873 | Sec22c         | 0.017103743 | 1.627261848  |
| ENSRNOG00000058663 | Suz12          | 0.017164749 | 1.302891644  |
| ENSRNOG00000030247 | Eif4ebp3       | 0.017171043 | -1.024975715 |
| ENSRNOG00000002930 | Ppl            | 0.01718136  | 0.957254289  |
| ENSRNOG00000018111 | Slc12a5        | 0.017187987 | 2.081469607  |
| ENSRNOG00000011857 | Mtpn           | 0.017191112 | 1.234102462  |
| ENSRNOG00000003576 | Ints2          | 0.017253833 | 1.479499325  |
| ENSRNOG00000054542 | #N/A           | 0.017263789 | -1.885400166 |
| ENSRNOG00000039207 | Ccdc71l        | 0.017294243 | 2.365122766  |

|                    |                |             |              |
|--------------------|----------------|-------------|--------------|
| ENSRNOG00000017156 | Ankle1         | 0.017327065 | 2.058969475  |
| ENSRNOG00000030871 | Calm2          | 0.017343762 | 0.91908706   |
| ENSRNOG00000020996 | Vps51          | 0.01734965  | 2.042026849  |
| ENSRNOG00000004956 | Jade2          | 0.017383772 | 2.550190378  |
| ENSRNOG00000049281 | Gba            | 0.017430488 | 1.423692977  |
| ENSRNOG00000061488 | AABR07026557.2 | 0.017438811 | -1.791745145 |
| ENSRNOG00000007219 | LOC103692716   | 0.017654982 | -1.923476462 |
| ENSRNOG00000025423 | Map3k13        | 0.017656853 | 1.115868685  |
| ENSRNOG00000004027 | Aldh9a1        | 0.017741243 | 1.253009982  |
| ENSRNOG00000028844 | Slc9a5         | 0.017765308 | 0.973715547  |
| ENSRNOG00000017690 | Ccsap          | 0.017849393 | 2.179554903  |
| ENSRNOG00000029244 | Pcdhb10        | 0.017853017 | 0.928431824  |
| ENSRNOG00000043037 | Zfp770         | 0.017890433 | 1.68106525   |
| ENSRNOG00000003398 | Tomm40l        | 0.017897854 | 1.744698204  |
| ENSRNOG00000002873 | Fam183a        | 0.017957116 | -0.974260921 |
| ENSRNOG00000021437 | AABR07073181.1 | 0.017962617 | 2.525296278  |
| ENSRNOG00000019843 | St3gal3        | 0.018030664 | 1.893153668  |
| ENSRNOG00000012269 | Lpcat3         | 0.018031901 | 1.046440914  |
| ENSRNOG00000008960 | #N/A           | 0.018043166 | 1.671092246  |
| ENSRNOG00000007410 | Dab1           | 0.018064292 | -0.905642409 |
| ENSRNOG00000010104 | Pofut1         | 0.018073043 | 1.613457738  |
| ENSRNOG00000029082 | AABR07005031.1 | 0.018106443 | 1.31090734   |
| ENSRNOG00000009439 | Eef1a1         | 0.01819182  | 0.86578037   |
| ENSRNOG00000025818 | Zxdc           | 0.018221883 | 1.538184326  |
| ENSRNOG00000033262 | Reep6          | 0.018224216 | 0.866909806  |
| ENSRNOG00000060905 | AC111831.2     | 0.01822736  | 2.408386009  |
| ENSRNOG00000011910 | Hnrnpr         | 0.018241925 | 0.904929514  |
| ENSRNOG00000053078 | Rnu11          | 0.018285762 | -1.594998037 |
| ENSRNOG00000008401 | Card10         | 0.018300268 | 2.640206123  |
| ENSRNOG00000025551 | Rgs22          | 0.018396345 | -0.85404595  |
| ENSRNOG00000050535 | RragB          | 0.018422605 | -2.77952264  |
| ENSRNOG00000002835 | Luc7l3         | 0.018426232 | -1.337355654 |
| ENSRNOG00000059702 | Tex9           | 0.018573065 | -1.231771483 |
| ENSRNOG00000011238 | Tiparp         | 0.018575028 | 1.667223141  |
| ENSRNOG00000021150 | Plcb3          | 0.018633316 | 1.652564778  |
| ENSRNOG00000047247 | Ptprs          | 0.018692898 | 1.885324083  |
| ENSRNOG00000022421 | Crtc1          | 0.018693165 | 1.558992226  |
| ENSRNOG00000011161 | Slc2a12        | 0.018695015 | -1.528039245 |
| ENSRNOG00000002710 | #N/A           | 0.018704669 | 2.010460963  |
| ENSRNOG00000039876 | LOC681410      | 0.018704768 | 1.96718736   |
| ENSRNOG00000059017 | AC106292.2     | 0.018749958 | 1.655316806  |
| ENSRNOG00000000155 | Cog3           | 0.018776401 | 1.550946127  |
| ENSRNOG00000010517 | Fam126a        | 0.01882167  | 1.620156313  |
| ENSRNOG00000005108 | Wfs1           | 0.018912729 | 0.892038888  |

|                    |                |             |              |
|--------------------|----------------|-------------|--------------|
| ENSRNOG00000014180 | Prickle4       | 0.018931564 | 2.059741281  |
| ENSRNOG00000014686 | Kcnd3          | 0.01895346  | -1.717953737 |
| ENSRNOG00000007371 | RbmX2          | 0.01896021  | -1.049723951 |
| ENSRNOG00000011953 | Supt16h        | 0.018984703 | 0.835535241  |
| ENSRNOG00000014503 | Celf4          | 0.018999716 | 1.440100186  |
| ENSRNOG00000010533 | Arfp1          | 0.019014138 | 0.890900154  |
| ENSRNOG00000002883 | Alg1           | 0.019126823 | 1.598113078  |
| ENSRNOG00000021578 | #N/A           | 0.019150237 | -0.884784904 |
| ENSRNOG00000026344 | Togaram2       | 0.019264704 | -0.791002553 |
| ENSRNOG00000048951 | LOC100364500   | 0.019277825 | 1.8244539    |
| ENSRNOG00000047367 | Card14         | 0.01933354  | 1.827305622  |
| ENSRNOG00000013581 | Extl3          | 0.019340631 | 1.782165742  |
| ENSRNOG00000025792 | Crk            | 0.019382624 | 1.464811489  |
| ENSRNOG00000061206 | AABR07064618.1 | 0.019420466 | -3.336237532 |
| ENSRNOG00000028586 | McpH1          | 0.019430555 | 1.62565295   |
| ENSRNOG00000055222 | AC094212.1     | 0.01943477  | 1.452485673  |
| ENSRNOG00000006952 | Prex1          | 0.019668653 | 2.289200159  |
| ENSRNOG00000009482 | Emx2           | 0.019724111 | 1.947172186  |
| ENSRNOG00000008490 | Cwc15          | 0.019754941 | -0.89346429  |
| ENSRNOG00000000397 | Ccar1          | 0.019773993 | -1.237102235 |
| ENSRNOG00000016544 | Arhgef28       | 0.019797515 | 0.782382781  |
| ENSRNOG00000057557 | Prlr           | 0.019836134 | 1.286913875  |
| ENSRNOG00000002941 | UhmK1          | 0.019855401 | 1.120194335  |
| ENSRNOG00000010591 | Kdm5a          | 0.019908688 | -1.134456795 |
| ENSRNOG00000010434 | Dync1li1       | 0.019965489 | 1.389979734  |
| ENSRNOG00000009040 | Gas2l1         | 0.019967383 | 3.604169693  |
| ENSRNOG00000002488 | #N/A           | 0.019989675 | 1.814760977  |
| ENSRNOG00000006711 | Zfp212         | 0.020063074 | 1.968697907  |
| ENSRNOG00000034200 | Atp8a1         | 0.020075326 | 1.442619629  |
| ENSRNOG00000015664 | Tmem8b         | 0.020091405 | 1.698460007  |
| ENSRNOG00000027867 | Rexo4          | 0.020106688 | 0.860297859  |
| ENSRNOG00000053210 | Zc3h11a        | 0.020108942 | 1.688692647  |
| ENSRNOG00000015397 | Cpne7          | 0.020145924 | -0.742443979 |
| ENSRNOG00000010119 | Zmat3          | 0.020158649 | 1.594243583  |
| ENSRNOG00000011254 | Fam76a         | 0.020188128 | 2.067422793  |
| ENSRNOG00000043093 | Ap1m2          | 0.020237298 | 0.788030038  |
| ENSRNOG00000048978 | Nphp3          | 0.020293876 | 1.882237315  |
| ENSRNOG00000056017 | Bcl7a          | 0.020297835 | 2.468275756  |
| ENSRNOG00000061237 | Dio1           | 0.020310798 | -1.886307922 |
| ENSRNOG00000055939 | Zcchc18        | 0.020338781 | 1.018174931  |
| ENSRNOG00000020044 | Mob2           | 0.020394346 | 1.008216377  |
| ENSRNOG00000047295 | Prr22          | 0.020415318 | -0.828881956 |
| ENSRNOG00000006033 | #N/A           | 0.020419931 | -0.774724464 |
| ENSRNOG00000005715 | Lgr4           | 0.02042358  | 1.076652567  |

|                    |                |             |              |
|--------------------|----------------|-------------|--------------|
| ENSRNOG00000047739 | Npff           | 0.020478589 | -1.132617444 |
| ENSRNOG00000004402 | Lpgat1         | 0.02051468  | 1.093333075  |
| ENSRNOG00000012237 | Rdx            | 0.020522074 | -0.991532907 |
| ENSRNOG00000026502 | Dsccl1         | 0.020571967 | -0.85685202  |
| ENSRNOG00000015511 | Atic           | 0.020581447 | 1.006293361  |
| ENSRNOG00000011823 | Tfap2b         | 0.020589623 | -1.076962983 |
| ENSRNOG00000048004 | Garem2         | 0.020654353 | 2.374941866  |
| ENSRNOG00000055499 | Grid1          | 0.020676312 | 1.496879731  |
| ENSRNOG00000046023 | Exoc4          | 0.020683858 | 1.631222429  |
| ENSRNOG00000002882 | Zcchc2         | 0.020704056 | 1.417124243  |
| ENSRNOG00000022298 | Cxcl11         | 0.020711726 | -1.7694749   |
| ENSRNOG00000027469 | Pcdhb4         | 0.020714064 | 1.129639516  |
| ENSRNOG00000018986 | Fbxl19         | 0.020763065 | 1.359193131  |
| ENSRNOG00000009157 | Fut4           | 0.020851818 | 0.808280829  |
| ENSRNOG00000060120 | Selenoo        | 0.02088025  | 1.890010714  |
| ENSRNOG00000031485 | #N/A           | 0.020989869 | 1.758422645  |
| ENSRNOG00000055096 | AABR07002768.1 | 0.021023388 | -1.639093385 |
| ENSRNOG00000011339 | Slk            | 0.021063513 | 1.166911439  |
| ENSRNOG00000028908 | Eppin          | 0.021093878 | 1.704441279  |
| ENSRNOG00000060105 | Astn2          | 0.021094472 | 1.716196022  |
| ENSRNOG00000008421 | Klhl5          | 0.021095602 | 1.858113616  |
| ENSRNOG00000042464 | Fbxo25         | 0.021103427 | 1.202759213  |
| ENSRNOG00000005775 | Phf14          | 0.021106253 | -0.819703065 |
| ENSRNOG00000013912 | Slc30a7        | 0.021122239 | 0.766588309  |
| ENSRNOG00000003508 | #N/A           | 0.021127394 | 1.704156673  |
| ENSRNOG00000019830 | Hsd17b1        | 0.021203503 | -0.788097804 |
| ENSRNOG00000008513 | LOC103690019   | 0.02122136  | 2.674710498  |
| ENSRNOG00000018319 | Pisd           | 0.021227421 | 1.794957346  |
| ENSRNOG00000029264 | Kcnn1          | 0.021237393 | 1.603445282  |
| ENSRNOG00000004473 | Ppargc1a       | 0.021244642 | 1.038913395  |
| ENSRNOG00000019500 | Cyp1a1         | 0.021249843 | -1.287930214 |
| ENSRNOG00000002001 | ltsn1          | 0.021251661 | 1.738317996  |
| ENSRNOG00000011313 | Sorcs1         | 0.021267635 | 2.115398644  |
| ENSRNOG00000003873 | Cpd            | 0.021290476 | 1.392435959  |
| ENSRNOG00000009863 | Prrt3          | 0.02133383  | 2.409698011  |
| ENSRNOG00000053099 | Wfdc15a        | 0.021451378 | -2.13784318  |
| ENSRNOG00000060312 | LOC108348197   | 0.021471883 | 1.646436536  |
| ENSRNOG00000009180 | Xkr7           | 0.0214929   | 1.783743003  |
| ENSRNOG00000009207 | Spata2         | 0.02157216  | 1.829497481  |
| ENSRNOG00000018485 | Gpr155         | 0.021706398 | 0.801983396  |
| ENSRNOG00000027574 | AABR07053879.1 | 0.021707676 | 1.386466671  |
| ENSRNOG00000003721 | Paqr4          | 0.021781068 | 1.987632003  |
| ENSRNOG00000004978 | Prkacb         | 0.021787507 | 2.011880187  |
| ENSRNOG00000033776 | LOC100359668   | 0.021821251 | 1.912884639  |

|                    |                |             |              |
|--------------------|----------------|-------------|--------------|
| ENSRNOG00000033490 | Vsig2          | 0.021905014 | 1.201424623  |
| ENSRNOG00000024372 | Cwf19l2        | 0.021911582 | -1.445373519 |
| ENSRNOG00000022971 | #N/A           | 0.021927294 | -1.270563912 |
| ENSRNOG00000000456 | Psmb8          | 0.021967069 | 1.513912957  |
| ENSRNOG00000015468 | Bpifb1         | 0.021975698 | -1.196351307 |
| ENSRNOG00000032847 | AABR07060145.1 | 0.022010518 | -1.127735191 |
| ENSRNOG00000008831 | Hcn2           | 0.022072846 | 1.87367868   |
| ENSRNOG00000036960 | Abcc9          | 0.022075403 | -1.689022173 |
| ENSRNOG00000008088 | Btbd3          | 0.022108233 | 1.125382097  |
| ENSRNOG00000048898 | Wasf3          | 0.022135635 | 1.4955064    |
| ENSRNOG00000012148 | Trio           | 0.02225888  | 1.832186715  |
| ENSRNOG00000023348 | Tbc1d2         | 0.022380412 | 1.669822585  |
| ENSRNOG00000032391 | Esyt2          | 0.022410169 | 1.564049587  |
| ENSRNOG00000018952 | Sema3g         | 0.022441342 | 2.139924285  |
| ENSRNOG00000059688 | AABR07030377.1 | 0.022514542 | -2.718497841 |
| ENSRNOG00000037765 | Lims1          | 0.022583307 | 1.89561271   |
| ENSRNOG00000001767 | RGD1562339     | 0.022612457 | 2.16565985   |
| ENSRNOG00000015830 | Ano9           | 0.022679882 | 1.468106832  |
| ENSRNOG00000024757 | AABR07069219.1 | 0.022735059 | 1.159825389  |
| ENSRNOG00000021017 | Ca11           | 0.022742655 | -0.802528132 |
| ENSRNOG00000015236 | Mybbp1a        | 0.022751011 | 1.401186544  |
| ENSRNOG00000025704 | Yod1           | 0.022758675 | 1.755766651  |
| ENSRNOG00000033090 | Ltbp1          | 0.022799418 | -0.842283073 |
| ENSRNOG00000049452 | Neb1           | 0.022858576 | -0.811325486 |
| ENSRNOG00000018764 | B3gnt3         | 0.022886523 | 1.075211843  |
| ENSRNOG00000013503 | Cdh24          | 0.023065103 | 1.612483952  |
| ENSRNOG00000019014 | Ndst1          | 0.023070341 | 1.610718845  |
| ENSRNOG00000057125 | Ddr1           | 0.023144931 | 0.783758416  |
| ENSRNOG00000004032 | Tmem94         | 0.023162174 | 1.500008253  |
| ENSRNOG00000001773 | Senp2          | 0.023184007 | 1.189444405  |
| ENSRNOG00000038002 | Ccdc62         | 0.023199516 | -1.019786993 |
| ENSRNOG00000023151 | Scgb2a1        | 0.023242755 | -2.194565673 |
| ENSRNOG00000023317 | Colgalt1       | 0.023247005 | 1.122172756  |
| ENSRNOG00000025648 | Dhrs7l1        | 0.023309325 | 1.714182985  |
| ENSRNOG00000005472 | Sp4            | 0.023353347 | 2.201961721  |
| ENSRNOG00000057382 | U1             | 0.023376516 | -2.403533621 |
| ENSRNOG00000008689 | Cbx1           | 0.023431751 | 1.213327065  |
| ENSRNOG00000054461 | RNaseP_nuc     | 0.023445207 | -2.505861468 |
| ENSRNOG00000018823 | Nisch          | 0.023483179 | 1.704733352  |
| ENSRNOG00000024651 | Greb1          | 0.023530163 | -1.800293444 |
| ENSRNOG00000002289 | Ildr1          | 0.023533769 | 1.188677082  |
| ENSRNOG00000008474 | Acox3          | 0.023558423 | 1.986682018  |
| ENSRNOG00000003287 | Fbxw10         | 0.023576319 | -2.072249517 |
| ENSRNOG00000026091 | Slc10a4        | 0.023655571 | 0.864364234  |

|                     |                |             |              |
|---------------------|----------------|-------------|--------------|
| ENSRNOG00000018145  | Crat           | 0.023691104 | 1.368462447  |
| ENSRNOG00000013318  | Ccdc150        | 0.023698914 | -1.198010355 |
| ENSRNOG00000003218  | Zfp286a        | 0.023732271 | -1.052671664 |
| ENSRNOG00000020653  | S1pr2          | 0.023773387 | 0.837057857  |
| ENSRNOG00000004476  | Wif1           | 0.02379126  | 1.103167838  |
| ENSRNOG00000013618  | Ankrd10        | 0.02380427  | 1.681778908  |
| ENSRNOG00000031045  | LOC100911252   | 0.023914671 | 1.044880925  |
| ENSRNOG00000013728  | Polg2          | 0.023950156 | -0.787766996 |
| ENSRNOG00000012950  | Efr3b          | 0.023987011 | 1.927182838  |
| ENSRNOG00000019948  | Phf20          | 0.024007042 | -0.900520786 |
| ENSRNOG00000003840  | Slit2          | 0.024049859 | -0.895316064 |
| ENSRNOG00000022143  | Dusp23         | 0.024257628 | 1.845329568  |
| ENSRNOG00000004753  | Napb           | 0.024259512 | 1.454550935  |
| ENSRNOG00000022260  | Senp1          | 0.024312589 | 1.553379772  |
| ENSRNOG00000050657  | Crlf3          | 0.024444349 | 1.203618686  |
| ENSRNOG00000005673  | Runx1t1        | 0.024646134 | -1.425986767 |
| ENSRNOG00000053067  | AABR07035008.1 | 0.024654669 | -1.801906163 |
| ENSRNOG00000022505  | Slc17a4        | 0.024786663 | -1.322000317 |
| ENSRNOG00000047780  | AABR07046635.1 | 0.024796593 | -2.285620917 |
| ENSRNOG00000049531  | Usp19          | 0.024798361 | 1.340880525  |
| ENSRNOG00000018522  | LOC100911186   | 0.024821998 | 1.625460194  |
| ENSRNOG00000028052  | RGD1563620     | 0.024831934 | 1.829486389  |
| ENSRNOG00000018020  | Apbb1          | 0.024926024 | 1.197459843  |
| ENSRNOG00000000795  | RT1-N3         | 0.024947503 | 2.170952474  |
| ENSRNOG00000019027  | Habp4          | 0.025116084 | 1.29408029   |
| ENSRNOG00000007115  | Crebl2         | 0.025132782 | 1.759201195  |
| ENSRNOG00000024172  | T2             | 0.02523289  | -1.038278299 |
| ENSRNOG00000037302  | Rad51          | 0.025249241 | 1.325316225  |
| ENSRNOG00000014478  | Fndc3a         | 0.02536498  | 1.078960819  |
| ENSRNOG00000014766  | Galt           | 0.025387362 | -0.773037058 |
| ENSRNOG00000013517  | Phtf2          | 0.025505553 | -0.766727908 |
| ENSRNOG00000014714  | Trpv6          | 0.025529064 | -0.756086181 |
| ENSRNOG00000004709  | Foxn3          | 0.025737347 | -1.098402788 |
| ENSRNOG00000024349  | Cbarp          | 0.025759999 | 1.840483262  |
| ENSRNOG00000020539  | Muc1           | 0.02577441  | -1.003609878 |
| ENSRNOG00000023814  | Rimklb         | 0.025846888 | 1.121348133  |
| ENSRNOG00000010608  | Cep162         | 0.025853499 | -0.914498999 |
| ENSRNOG00000007916  | Ptk2           | 0.025865639 | 1.184034874  |
| ENSRNOG00000002196  | Ociad2         | 0.025883837 | 1.512866916  |
| ENSRNOG00000016210  | Micalcl        | 0.026009096 | -0.761572279 |
| ENSRNOG00000004608  | Pam16          | 0.02606611  | -0.806568704 |
| ENSRNOG00000046969  | AABR07034438.1 | 0.026149519 | 1.26177237   |
| ENSRNOG000000061543 | Ap2b1          | 0.026168296 | 1.149831809  |
| ENSRNOG00000017707  | Abi2           | 0.026184886 | 1.506842406  |



|                    |                |             |              |
|--------------------|----------------|-------------|--------------|
| ENSRNOG00000010379 | Celf1          | 0.026193925 | 0.841151351  |
| ENSRNOG00000015914 | U2af2          | 0.026198229 | 1.358394337  |
| ENSRNOG00000023021 | Msl2           | 0.026329041 | 1.01806309   |
| ENSRNOG00000014152 | Kcnp3          | 0.026363096 | 1.587551319  |
| ENSRNOG00000028628 | LOC100911196   | 0.026504746 | 1.509979416  |
| ENSRNOG00000056678 | Nckap5l        | 0.026599486 | 1.633461196  |
| ENSRNOG00000052814 | Ankrd27        | 0.026624136 | 1.379057878  |
| ENSRNOG00000049088 | Ttc32          | 0.026625735 | -1.237412884 |
| ENSRNOG00000016269 | Rpl7l1         | 0.026639227 | 1.408346982  |
| ENSRNOG00000010896 | Tprn           | 0.026694695 | 0.893595563  |
| ENSRNOG00000012534 | Mfsd10         | 0.026775871 | 1.232089431  |
| ENSRNOG00000015409 | Usp5           | 0.026921665 | 1.250523208  |
| ENSRNOG00000049523 | AC097153.2     | 0.026925481 | -2.578810502 |
| ENSRNOG00000015380 | Jup            | 0.027024906 | 0.793996898  |
| ENSRNOG00000038184 | Camk2n2        | 0.027027885 | 3.332756351  |
| ENSRNOG00000025594 | Scrt1          | 0.027064687 | 2.302171544  |
| ENSRNOG00000055694 | LOC102553190   | 0.027072988 | -1.054877977 |
| ENSRNOG00000052357 | Fosl2          | 0.027178831 | 2.494107007  |
| ENSRNOG00000004414 | F11r           | 0.027222927 | 1.190641864  |
| ENSRNOG00000032546 | Dot1l          | 0.027237783 | 1.375833091  |
| ENSRNOG00000023837 | Mtx3           | 0.027256621 | 1.007467453  |
| ENSRNOG00000051085 | AABR07011062.1 | 0.027304432 | -2.277478005 |
| ENSRNOG00000023614 | Hsh2d          | 0.027341798 | 1.365383946  |
| ENSRNOG00000000662 | #N/A           | 0.027380043 | 1.526893067  |
| ENSRNOG00000002192 | Rel1           | 0.027418981 | 0.851920341  |
| ENSRNOG00000003649 | Qsox1          | 0.027422939 | 1.146453245  |
| ENSRNOG00000018400 | Golm1          | 0.027484412 | 1.364042566  |
| ENSRNOG00000029377 | Rpl38          | 0.027610398 | -1.589971329 |
| ENSRNOG00000010194 | Ift43          | 0.027644278 | -0.745984096 |
| ENSRNOG00000009598 | Ncaph2         | 0.027704397 | 1.462941046  |
| ENSRNOG00000061005 | AABR07016572.1 | 0.027773738 | -1.108752954 |
| ENSRNOG00000026873 | AC136588.1     | 0.027809533 | 1.940310911  |
| ENSRNOG00000010514 | Cachd1         | 0.027825967 | 1.341457393  |
| ENSRNOG00000004676 | Pak3           | 0.028015686 | -1.252738599 |
| ENSRNOG00000049900 | Irf2bp2        | 0.028045309 | 1.44338299   |
| ENSRNOG00000059408 | Prr12          | 0.028130534 | 1.474620406  |
| ENSRNOG00000015845 | Niban2         | 0.028198883 | 0.914950412  |
| ENSRNOG00000049552 | AABR07030903.1 | 0.028253215 | 1.838171406  |
| ENSRNOG00000018778 | Cadm1          | 0.028285041 | -0.981693752 |
| ENSRNOG00000003596 | Itgb1bp2       | 0.028292275 | -1.093387913 |
| ENSRNOG00000004172 | Pdk2           | 0.028390386 | 1.643047057  |
| ENSRNOG00000062011 | AABR07058511.2 | 0.028435133 | -2.149313021 |
| ENSRNOG00000002312 | Atp10d         | 0.028461834 | 1.933192692  |
| ENSRNOG00000000161 | Chm            | 0.028524698 | 1.336796488  |

|                    |                |             |              |
|--------------------|----------------|-------------|--------------|
| ENSRNOG00000059793 | Rab37          | 0.028550186 | 1.245576305  |
| ENSRNOG00000036697 | Mafg           | 0.02859012  | -0.905325906 |
| ENSRNOG00000061515 | Fbxo45         | 0.028636788 | 1.764784965  |
| ENSRNOG00000057458 | Oip5           | 0.028675559 | 1.324512896  |
| ENSRNOG00000028814 | Oasl2          | 0.028822402 | -0.962986447 |
| ENSRNOG00000013729 | RGD1306271     | 0.02885674  | 1.276334199  |
| ENSRNOG00000022736 | Cdkn2aip       | 0.028878378 | 0.793128975  |
| ENSRNOG00000034168 | Gemin7l1       | 0.029044513 | 2.011959176  |
| ENSRNOG00000011987 | Cd2ap          | 0.029051089 | 1.051726972  |
| ENSRNOG00000015670 | #N/A           | 0.029089275 | 1.606935878  |
| ENSRNOG00000006979 | Hpca           | 0.029127415 | 2.2115712    |
| ENSRNOG00000016033 | Endog          | 0.029221527 | 1.298167813  |
| ENSRNOG00000038597 | Dlg1           | 0.029437816 | 1.049132865  |
| ENSRNOG00000060479 | Sp3            | 0.029456324 | 1.438984065  |
| ENSRNOG00000021338 | Tmem132a       | 0.029490874 | 1.762680182  |
| ENSRNOG00000009789 | Topbp1         | 0.029535387 | 1.43798219   |
| ENSRNOG00000000407 | Dcbld1         | 0.029536538 | 1.266485218  |
| ENSRNOG00000012736 | Znrd2          | 0.029581334 | 1.339647422  |
| ENSRNOG00000020517 | Prrg2          | 0.029592338 | 0.804293276  |
| ENSRNOG00000057221 | Scn3b          | 0.029633301 | -0.852975232 |
| ENSRNOG00000018109 | Clic4          | 0.029642651 | 1.596528944  |
| ENSRNOG00000000437 | Agpat1         | 0.029671444 | 0.801204973  |
| ENSRNOG00000001686 | HLcs           | 0.029679787 | 2.141056097  |
| ENSRNOG00000009406 | Tm9sf4         | 0.029899803 | 0.89204289   |
| ENSRNOG00000043215 | Rtbdn          | 0.029970115 | -1.018055117 |
| ENSRNOG00000011544 | Zfp219         | 0.030006062 | 1.918291526  |
| ENSRNOG00000005905 | Pde4b          | 0.030066448 | 1.967814354  |
| ENSRNOG00000053502 | Arhgef17       | 0.030090766 | 3.066441431  |
| ENSRNOG00000055365 | Edem1          | 0.03009661  | 1.220897644  |
| ENSRNOG00000013431 | Rsbni1         | 0.030110647 | -1.016472363 |
| ENSRNOG00000047867 | Klhdc8b        | 0.030111326 | 0.897610604  |
| ENSRNOG00000018785 | Slc16a13       | 0.030230744 | 0.906416002  |
| ENSRNOG00000019907 | Nfkbie         | 0.030289158 | 1.38678154   |
| ENSRNOG00000037911 | LOC680227      | 0.030311168 | 1.655599778  |
| ENSRNOG00000032828 | Mapk8ip2       | 0.030332939 | 0.870360083  |
| ENSRNOG00000028580 | Pcnx2          | 0.03042286  | 1.823705966  |
| ENSRNOG00000002050 | Igfbp7         | 0.030511797 | 0.800918012  |
| ENSRNOG00000000042 | Xpr1           | 0.030535385 | 1.598746466  |
| ENSRNOG00000031129 | Carm1          | 0.030548982 | 1.698086623  |
| ENSRNOG00000023484 | Rpap2          | 0.030642086 | -0.743136084 |
| ENSRNOG00000002423 | AABR07029651.1 | 0.030718993 | 1.925599711  |
| ENSRNOG00000050210 | RT1-CE10       | 0.030751218 | 1.09876837   |
| ENSRNOG00000033791 | Apc2           | 0.030774849 | 0.903989134  |
| ENSRNOG00000001173 | Cabp1          | 0.030874988 | -0.835863484 |

|                    |                |             |              |
|--------------------|----------------|-------------|--------------|
| ENSRNOG00000052945 | AABR07002969.1 | 0.030876651 | 2.005567801  |
| ENSRNOG00000028543 | AABR07052523.1 | 0.030914385 | 0.786084834  |
| ENSRNOG00000015202 | Dnajc5         | 0.030936396 | 1.100578419  |
| ENSRNOG00000019336 | Gata3          | 0.03101527  | -0.938712375 |
| ENSRNOG00000018557 | Cdh22          | 0.031148105 | 1.945549766  |
| ENSRNOG00000003834 | Map2k4         | 0.031156204 | 1.013890708  |
| ENSRNOG00000009930 | Pigo           | 0.031246596 | 1.317814352  |
| ENSRNOG00000046568 | AABR07051791.1 | 0.031297733 | -1.770723707 |
| ENSRNOG00000016849 | Ppp2r5d        | 0.031321972 | 1.383464437  |
| ENSRNOG00000011887 | RGD1307929     | 0.031350651 | 0.885236227  |
| ENSRNOG00000011165 | Dydc1          | 0.031389098 | -1.220768163 |
| ENSRNOG00000012016 | Npc1           | 0.031427673 | 1.375187489  |
| ENSRNOG00000059715 | Cc2d2a         | 0.031498984 | -0.832230214 |
| ENSRNOG00000028016 | AABR07021402.1 | 0.031523727 | -2.283290802 |
| ENSRNOG00000017800 | Foxc1          | 0.031531071 | -0.884640049 |
| ENSRNOG00000053790 | AABR07036007.1 | 0.031566858 | -1.362789011 |
| ENSRNOG00000032882 | #N/A           | 0.031568688 | -1.393702234 |
| ENSRNOG00000050051 | Pin4           | 0.031641021 | -1.195973009 |
| ENSRNOG00000020603 | Angptl6        | 0.031685362 | -0.758823787 |
| ENSRNOG00000023356 | Eif5b          | 0.031728777 | -1.205756879 |
| ENSRNOG00000015534 | Cnep1r1        | 0.031734909 | 0.91818867   |
| ENSRNOG00000051627 | AABR07053580.1 | 0.031829651 | 1.168025332  |
| ENSRNOG00000037124 | #N/A           | 0.031856296 | -1.644653739 |
| ENSRNOG00000021916 | Slc16a12       | 0.031939514 | 2.065281692  |
| ENSRNOG00000013089 | Kif13b         | 0.031950271 | 1.598387685  |
| ENSRNOG00000001792 | Slc12a8        | 0.032113345 | 0.880302245  |
| ENSRNOG00000005865 | Itprid2        | 0.03227212  | 1.008561072  |
| ENSRNOG00000061262 | Huwe1          | 0.032456955 | 1.34087851   |
| ENSRNOG00000047598 | Ctdsp2         | 0.032479692 | 1.51021619   |
| ENSRNOG00000015903 | Add2           | 0.032498648 | 1.536305537  |
| ENSRNOG00000010029 | Ubald2         | 0.032505023 | 1.183275484  |
| ENSRNOG00000039994 | Upf3b          | 0.032543351 | -1.342762776 |
| ENSRNOG00000037793 | Cdk5r2         | 0.032551255 | 1.01409697   |
| ENSRNOG00000008728 | Unc79          | 0.032575191 | 1.18713825   |
| ENSRNOG00000007427 | Entpd6         | 0.032586129 | 0.849411036  |
| ENSRNOG00000001864 | Tmem191c       | 0.032656395 | 1.768732995  |
| ENSRNOG00000061733 | LOC103690156   | 0.032732788 | 1.120937496  |
| ENSRNOG00000049689 | Smim18         | 0.032799109 | -1.434831561 |
| ENSRNOG00000013209 | Barhl1         | 0.032804798 | 0.916883072  |
| ENSRNOG00000048878 | Smim24         | 0.032820222 | 1.192925063  |
| ENSRNOG00000052894 | Epg5           | 0.032841616 | 1.650633675  |
| ENSRNOG00000012095 | Pkia           | 0.032851613 | 1.053628716  |
| ENSRNOG00000057945 | Fancg          | 0.032865533 | 1.319779978  |
| ENSRNOG00000011618 | Mmaa           | 0.032940529 | -0.762742859 |

|                     |                |             |              |
|---------------------|----------------|-------------|--------------|
| ENSRNOG00000004806  | Strn           | 0.032959043 | 1.439933376  |
| ENSRNOG00000004726  | #N/A           | 0.033010478 | 0.997419817  |
| ENSRNOG000000021441 | Reln           | 0.033026999 | 1.428350329  |
| ENSRNOG00000007359  | #N/A           | 0.033055564 | 1.25756479   |
| ENSRNOG000000002129 | Lrrc8b         | 0.033079644 | 1.187203982  |
| ENSRNOG000000016108 | Phlpp2         | 0.033152533 | 1.632153609  |
| ENSRNOG000000003807 | Wnt9b          | 0.033167968 | -1.075140865 |
| ENSRNOG000000006368 | Lrrn3          | 0.033196143 | 1.234653741  |
| ENSRNOG000000005561 | Brinp1         | 0.033245932 | 1.105795447  |
| ENSRNOG000000006025 | Lamb3          | 0.0332543   | 1.323756055  |
| ENSRNOG000000026055 | Neurod6        | 0.033298638 | -2.177675823 |
| ENSRNOG000000060726 | AABR07072423.1 | 0.033555198 | -2.583891059 |
| ENSRNOG000000024450 | Poc1b          | 0.033575176 | -0.823657079 |
| ENSRNOG000000024663 | Fkbp15         | 0.033590744 | 1.348010412  |
| ENSRNOG000000000417 | Numa1          | 0.033606927 | 1.054878398  |
| ENSRNOG000000027540 | Fam102b        | 0.033623699 | 2.323780657  |
| ENSRNOG000000021330 | Sprtn          | 0.033756811 | 1.729146711  |
| ENSRNOG000000019099 | AABR07054578.1 | 0.033903081 | 1.539317597  |
| ENSRNOG000000029556 | LOC304725      | 0.034024878 | -1.798673035 |
| ENSRNOG000000053240 | Soga1          | 0.034026219 | 1.972470936  |
| ENSRNOG000000051528 | Ddx11          | 0.034045149 | 1.760233036  |
| ENSRNOG000000004873 | Prkch          | 0.034101418 | 2.129089081  |
| ENSRNOG000000032924 | AABR07064753.1 | 0.034151439 | -1.834732603 |
| ENSRNOG000000009894 | Vps50          | 0.0341761   | 1.493851798  |
| ENSRNOG000000004962 | Prdm4          | 0.0341943   | 1.374254075  |
| ENSRNOG000000014668 | RGD621098      | 0.034235186 | 1.398185948  |
| ENSRNOG000000003657 | Pkmyt1         | 0.034249197 | 1.988994715  |
| ENSRNOG000000009033 | Cntn2          | 0.034254932 | 2.022904904  |
| ENSRNOG000000003924 | Pi4k2b         | 0.034368134 | 1.615650081  |
| ENSRNOG000000015152 | Pkp3           | 0.034435984 | 0.947244935  |
| ENSRNOG000000025624 | #N/A           | 0.03449985  | -0.862441733 |
| ENSRNOG000000011614 | Tmcc1          | 0.034548614 | 1.1807734    |
| ENSRNOG000000049952 | Gucd1          | 0.034564932 | 1.577856597  |
| ENSRNOG000000017642 | Acbd5          | 0.034679483 | 1.218294608  |
| ENSRNOG000000060931 | Rspry1         | 0.034764745 | 1.286046253  |
| ENSRNOG000000021265 | Cds2           | 0.034768948 | 1.111513113  |
| ENSRNOG000000010466 | Chpf2          | 0.034781873 | 1.396426773  |
| ENSRNOG000000004311 | Gpr182         | 0.034861013 | 1.853089827  |
| ENSRNOG000000052167 | Marveld2       | 0.034967299 | 1.098573691  |
| ENSRNOG000000051384 | AABR07002337.1 | 0.035022236 | -1.776365545 |
| ENSRNOG000000024454 | Ccdc149        | 0.035040965 | 1.616856963  |
| ENSRNOG000000051294 | AABR07034923.1 | 0.035062829 | -1.774721944 |
| ENSRNOG000000010545 | Mrap2          | 0.035151498 | -0.963118505 |
| ENSRNOG000000019306 | Syt12          | 0.035165684 | -0.861273328 |

|                     |                |             |              |
|---------------------|----------------|-------------|--------------|
| ENSRNOG00000001548  | Nfe2l2         | 0.035190097 | 0.768067762  |
| ENSRNOG000000020813 | Ltbp3          | 0.035211614 | 1.578644593  |
| ENSRNOG000000022595 | LOC100362965   | 0.03521489  | 1.554303514  |
| ENSRNOG000000024801 | #N/A           | 0.035332733 | 1.249887227  |
| ENSRNOG00000003901  | Cfap36         | 0.035393153 | -0.850053932 |
| ENSRNOG000000016186 | Zfp709         | 0.035453848 | 0.856570753  |
| ENSRNOG00000000891  | #REF!          | 0.035561871 | -1.298223421 |
| ENSRNOG000000034266 | Ccdc63         | 0.035570822 | -1.104801186 |
| ENSRNOG000000004169 | Fzr1           | 0.035580875 | 1.3010359    |
| ENSRNOG000000021183 | Rcor2l1        | 0.035594428 | -1.602123747 |
| ENSRNOG000000005811 | #N/A           | 0.035622377 | 1.330857135  |
| ENSRNOG000000029813 | AABR07035218.1 | 0.035633907 | 1.200641807  |
| ENSRNOG000000001813 | Dnm1l          | 0.035736397 | 0.921854978  |
| ENSRNOG000000026271 | Tmem245        | 0.035805969 | 1.252659283  |
| ENSRNOG000000021026 | Zfp687         | 0.035903605 | 1.333862219  |
| ENSRNOG000000047781 | Slc25a23       | 0.035943267 | 2.261575915  |
| ENSRNOG000000046871 | LOC681367      | 0.036182646 | 1.455704411  |
| ENSRNOG000000016172 | Ric1           | 0.036196331 | 1.429858182  |
| ENSRNOG000000008934 | Tmem65         | 0.03620232  | 0.965242928  |
| ENSRNOG000000014838 | #N/A           | 0.036242607 | 1.242235733  |
| ENSRNOG000000024763 | LOC685431      | 0.036255931 | 1.223954297  |
| ENSRNOG000000016419 | Pdlim5         | 0.036257762 | 1.604778024  |
| ENSRNOG000000009005 | Slco2a1        | 0.036330643 | 0.789952668  |
| ENSRNOG000000018232 | Srf            | 0.036368008 | 0.822748647  |
| ENSRNOG000000002541 | Pds5a          | 0.036448782 | 0.815674358  |
| ENSRNOG000000012733 | Ankrd12        | 0.036462441 | -0.909564688 |
| ENSRNOG000000054840 | AABR07053837.1 | 0.036598081 | -0.94507744  |
| ENSRNOG000000018373 | Tln2           | 0.03664441  | 1.97107752   |
| ENSRNOG000000008224 | Jdp2           | 0.03674858  | 1.177514619  |
| ENSRNOG000000046644 | Prelid3b       | 0.036765892 | 0.85781802   |
| ENSRNOG000000022911 | Hjrp           | 0.036792388 | 1.371301944  |
| ENSRNOG000000014460 | Hivep1         | 0.036796735 | 0.860483203  |
| ENSRNOG000000024019 | Ccdc6          | 0.036804427 | 1.624326521  |
| ENSRNOG000000019573 | Lcat           | 0.036848808 | -1.192971486 |
| ENSRNOG000000008245 | AABR07054614.1 | 0.036850292 | -1.143873334 |
| ENSRNOG000000060020 | C1ql4          | 0.036862891 | 1.51857891   |
| ENSRNOG000000014678 | Fzd5           | 0.036888812 | 1.855136841  |
| ENSRNOG000000012440 | Msra           | 0.036902952 | 2.216678383  |
| ENSRNOG000000009274 | Fut11          | 0.03693351  | 1.457289767  |
| ENSRNOG000000033057 | AABR07025010.1 | 0.036999163 | 1.023979687  |
| ENSRNOG000000021102 | #N/A           | 0.03702617  | 1.44928671   |
| ENSRNOG000000003785 | Usp43          | 0.037056654 | 1.902138273  |
| ENSRNOG000000007030 | Epha7          | 0.037192247 | 0.901861348  |
| ENSRNOG000000060614 | Pxdn           | 0.037280405 | 1.615327986  |

|                     |                |             |              |
|---------------------|----------------|-------------|--------------|
| ENSRNOG00000002940  | Ankrd17        | 0.037342718 | -0.905756109 |
| ENSRNOG000000021021 | Ffar2          | 0.03737122  | 1.472399829  |
| ENSRNOG000000021041 | #N/A           | 0.037412883 | 1.2972858    |
| ENSRNOG000000004760 | Lars2          | 0.037422111 | 1.678086049  |
| ENSRNOG000000008782 | Pnlsr          | 0.03743917  | -0.971313819 |
| ENSRNOG000000045647 | Hax1           | 0.037616853 | 1.41273947   |
| ENSRNOG000000054603 | Pacsin1        | 0.037637022 | 1.989186243  |
| ENSRNOG000000053560 | Rhou           | 0.037652978 | 1.88243686   |
| ENSRNOG000000013178 | #N/A           | 0.037699194 | 1.420021401  |
| ENSRNOG000000005070 | Spopl          | 0.037707539 | 1.524794628  |
| ENSRNOG000000018582 | Exosc6         | 0.037731169 | 1.44024374   |
| ENSRNOG000000057806 | Trpm7          | 0.037862827 | 1.080883454  |
| ENSRNOG000000015333 | AABR07070225.1 | 0.037877196 | -0.943691749 |
| ENSRNOG000000056526 | AABR07054262.1 | 0.03795153  | 1.426487896  |
| ENSRNOG000000036683 | Sirt7          | 0.037962811 | 0.801739806  |
| ENSRNOG000000018110 | Svil           | 0.037997009 | 0.795907714  |
| ENSRNOG000000037798 | Erich4         | 0.038019924 | -1.515696009 |
| ENSRNOG000000017899 | Akr7a3         | 0.038038805 | -1.093960682 |
| ENSRNOG000000014434 | Chd1           | 0.038039156 | 0.812761574  |
| ENSRNOG000000050057 | Abca3          | 0.038064419 | 1.409621912  |
| ENSRNOG000000004749 | Slc30a1        | 0.0380728   | 0.906758574  |
| ENSRNOG000000061254 | AABR07015042.1 | 0.038074446 | -2.866982533 |
| ENSRNOG000000008869 | Ppp1r9a        | 0.038121874 | 1.057666146  |
| ENSRNOG000000009057 | Sec62          | 0.038138766 | -1.244062306 |
| ENSRNOG000000025174 | #N/A           | 0.038185239 | 1.066858628  |
| ENSRNOG000000012163 | #N/A           | 0.038209075 | 1.745462027  |
| ENSRNOG000000033411 | Usp12          | 0.038334149 | 0.891010015  |
| ENSRNOG000000020715 | Ddb1           | 0.03833431  | 0.880361164  |
| ENSRNOG000000059440 | AABR07068316.2 | 0.03837918  | -1.775715283 |
| ENSRNOG000000005923 | Mtmr2          | 0.038587074 | 0.973463034  |
| ENSRNOG000000019552 | Lsm7           | 0.038632561 | -0.788267505 |
| ENSRNOG000000028436 | Rprml          | 0.038666561 | -0.810386477 |
| ENSRNOG000000015430 | Nlgn2          | 0.038842417 | 1.408450187  |
| ENSRNOG000000010750 | Twistnb        | 0.038896797 | -1.054559366 |
| ENSRNOG000000002255 | Fam162a        | 0.038925006 | -0.750661368 |
| ENSRNOG000000006515 | Klhl15         | 0.038941279 | 1.160085278  |
| ENSRNOG000000061519 | Asap2          | 0.039029827 | 1.597195415  |
| ENSRNOG000000024566 | Sh3d21         | 0.039048099 | -0.993726261 |
| ENSRNOG000000009836 | Rbm26          | 0.039141861 | -1.201903359 |
| ENSRNOG000000020272 | 5330417C22Rik  | 0.039201702 | 0.815647153  |
| ENSRNOG000000001781 | Lmln           | 0.039332827 | 1.092974458  |
| ENSRNOG000000007975 | Ncoa2          | 0.039394783 | 1.692676602  |
| ENSRNOG000000050510 | Rab1b          | 0.0393948   | 0.766447431  |
| ENSRNOG000000011329 | Pkm            | 0.039418505 | 0.985778303  |

|                    |                |             |              |
|--------------------|----------------|-------------|--------------|
| ENSRNOG00000046424 | Mfn2           | 0.039454908 | 1.157810888  |
| ENSRNOG00000033235 | Relb           | 0.039617932 | 1.33588257   |
| ENSRNOG00000027022 | AABR07043654.1 | 0.039645794 | 1.614228302  |
| ENSRNOG00000039476 | Pcdhb2         | 0.039661361 | 1.758908684  |
| ENSRNOG00000018003 | F2rl1          | 0.039672746 | 0.902924396  |
| ENSRNOG00000013169 | Traf4          | 0.039754098 | 0.932184967  |
| ENSRNOG00000010921 | Taf1d          | 0.039769344 | -1.158059683 |
| ENSRNOG00000023917 | #N/A           | 0.039800863 | 1.461229368  |
| ENSRNOG00000048213 | AABR07039304.1 | 0.03986113  | 1.207101816  |
| ENSRNOG00000030404 | Arrb1          | 0.039898659 | 1.682209527  |
| ENSRNOG00000019857 | Gng7           | 0.039904487 | 1.315578436  |
| ENSRNOG00000018881 | Rnasek         | 0.040053629 | 0.825550883  |
| ENSRNOG00000000036 | Klhdc8a        | 0.040155511 | 0.768461475  |
| ENSRNOG00000059043 | Itch           | 0.040158112 | 1.31934802   |
| ENSRNOG00000005087 | Cebpz          | 0.040180949 | -0.895723354 |
| ENSRNOG00000056332 | Miga1          | 0.040191335 | 1.420562984  |
| ENSRNOG00000056297 | Fmn13          | 0.040196988 | 1.715589328  |
| ENSRNOG00000023896 | Dusp6          | 0.04022238  | -1.148245851 |
| ENSRNOG00000008683 | Alk            | 0.040385823 | -0.920065048 |
| ENSRNOG00000006796 | LOC102555183   | 0.040466609 | 1.385799713  |
| ENSRNOG00000017951 | Ranbp9         | 0.040482099 | 0.798182248  |
| ENSRNOG00000009106 | C2cd4b         | 0.040496202 | 1.388139929  |
| ENSRNOG00000002229 | Adcy5          | 0.040518821 | 1.148645243  |
| ENSRNOG00000016984 | Atg13          | 0.04053056  | 2.323046604  |
| ENSRNOG00000010846 | #N/A           | 0.040690429 | 1.599754692  |
| ENSRNOG00000010934 | Spa17          | 0.040732057 | -1.081516606 |
| ENSRNOG00000032258 | Swt1           | 0.040809583 | -0.839687155 |
| ENSRNOG00000056036 | LOC103691005   | 0.040832109 | -1.106144404 |
| ENSRNOG00000045698 | Lin7c          | 0.04090965  | 0.945606876  |
| ENSRNOG00000050424 | Nme4           | 0.040934514 | 0.937763558  |
| ENSRNOG00000017857 | LOC108348250   | 0.041154328 | 1.433748526  |
| ENSRNOG00000003251 | B3galt2        | 0.041366725 | 1.347924558  |
| ENSRNOG00000046891 | Hk1            | 0.041431393 | 1.430538362  |
| ENSRNOG00000054775 | Fkbp11         | 0.041458012 | 0.796434044  |
| ENSRNOG00000009613 | Sh3bgrl2       | 0.041680901 | 1.425413691  |
| ENSRNOG00000008754 | Flvcr2         | 0.041722422 | -1.263591854 |
| ENSRNOG00000019579 | Edc3           | 0.041867091 | 1.285570019  |
| ENSRNOG00000060571 | Tmem189        | 0.041998953 | 0.876028102  |
| ENSRNOG00000007645 | Kcnj9          | 0.042062098 | -0.841650754 |
| ENSRNOG00000020115 | Ilkap          | 0.042143204 | -0.73748489  |
| ENSRNOG00000042333 | Dnal1          | 0.042180616 | -0.82521789  |
| ENSRNOG00000062175 | AABR07034274.1 | 0.042191764 | -2.003260531 |
| ENSRNOG00000008239 | Repin1         | 0.0422062   | 1.403441943  |
| ENSRNOG00000011140 | Prxl2a         | 0.042313581 | -0.788713222 |

|                    |                |             |              |
|--------------------|----------------|-------------|--------------|
| ENSRNOG00000013170 | Il13ra1        | 0.042477084 | 1.611506385  |
| ENSRNOG00000010543 | Srpra          | 0.042536316 | 0.897962253  |
| ENSRNOG00000057558 | AC128792.2     | 0.042538612 | 1.498839066  |
| ENSRNOG00000014006 | Neto1          | 0.042549054 | -1.914186813 |
| ENSRNOG00000050453 | AABR07002848.1 | 0.042667888 | 2.681084639  |
| ENSRNOG00000003707 | Zmym3          | 0.042694245 | 1.02890277   |
| ENSRNOG00000007632 | Mss51          | 0.042785844 | -0.973701443 |
| ENSRNOG00000015753 | Epn1           | 0.042992191 | 1.159657557  |
| ENSRNOG00000020843 | #N/A           | 0.043059121 | 1.023457201  |
| ENSRNOG00000028592 | AABR07035074.1 | 0.043101757 | 1.092793815  |
| ENSRNOG00000050091 | Efcab1         | 0.043131116 | 2.389854495  |
| ENSRNOG00000031135 | Smarcc2        | 0.043203013 | 1.06998698   |
| ENSRNOG00000015434 | Midn           | 0.043288791 | 0.973873055  |
| ENSRNOG00000038905 | AABR07048397.1 | 0.043638086 | 1.489373543  |
| ENSRNOG00000059055 | Hsbp1l1        | 0.043661294 | -1.230749193 |
| ENSRNOG00000020525 | Col5a3         | 0.043818021 | -0.948961718 |
| ENSRNOG00000019075 | Stat5b         | 0.043818321 | 1.368814402  |
| ENSRNOG00000009936 | Dido1          | 0.043858813 | 0.917012871  |
| ENSRNOG00000061785 | AABR07065124.2 | 0.043867546 | -1.736735098 |
| ENSRNOG00000011794 | Tcea3          | 0.043975706 | -1.317487112 |
| ENSRNOG00000057601 | AABR07044080.2 | 0.043998856 | -1.104191    |
| ENSRNOG00000033169 | Cpeb4          | 0.044089938 | 1.539642705  |
| ENSRNOG00000052528 | SNORA73        | 0.044111458 | -1.66097168  |
| ENSRNOG00000001931 | Fgf12          | 0.044129813 | -0.891142845 |
| ENSRNOG00000023721 | LOC502684      | 0.044134339 | -1.091457089 |
| ENSRNOG00000016316 | Mcm2           | 0.044142337 | 1.009695657  |
| ENSRNOG00000010156 | Snapc5         | 0.044325419 | 0.958470508  |
| ENSRNOG00000031778 | Mef2d          | 0.044330635 | 0.846455861  |
| ENSRNOG00000008247 | Ikbip          | 0.044414146 | -0.882980749 |
| ENSRNOG00000015026 | Arhgef11       | 0.044469144 | 1.308067094  |
| ENSRNOG00000056617 | Zswim8         | 0.044534633 | 2.030220652  |
| ENSRNOG00000055750 | AABR07044717.1 | 0.044607093 | 2.015677057  |
| ENSRNOG00000018416 | Ttbk1          | 0.044785036 | 1.21678919   |
| ENSRNOG00000027259 | AABR07029661.1 | 0.044789836 | 1.356299274  |
| ENSRNOG00000009977 | Thrap3         | 0.044940702 | 0.968404423  |
| ENSRNOG00000007300 | C1qtnf6        | 0.04497365  | 0.968644354  |
| ENSRNOG00000039740 | Cenpk          | 0.044991464 | -1.235862399 |
| ENSRNOG00000017858 | Tsr3           | 0.045032237 | 1.295270141  |
| ENSRNOG00000010875 | Fam241a        | 0.045035983 | 0.7758888    |
| ENSRNOG00000059579 | Gpt2           | 0.045092003 | 1.529744255  |
| ENSRNOG00000027436 | Zfp324         | 0.045119287 | 1.754635567  |
| ENSRNOG00000011661 | Hnrnp2         | 0.045119625 | 1.063724984  |
| ENSRNOG00000008332 | Smo            | 0.04516521  | -1.613867168 |
| ENSRNOG00000027229 | Slc35d2        | 0.045176079 | -0.860600237 |



|                     |                |             |              |
|---------------------|----------------|-------------|--------------|
| ENSRNOG00000014513  | Rexo5          | 0.045217876 | -0.746463269 |
| ENSRNOG00000025523  | Armh3          | 0.045233804 | 1.249981707  |
| ENSRNOG00000010486  | Mpp4           | 0.045325793 | -1.269988716 |
| ENSRNOG00000005447  | Ypel2          | 0.045473503 | 1.572006751  |
| ENSRNOG00000020134  | Upf1           | 0.045549483 | 1.310428748  |
| ENSRNOG00000042536  | Pde4d          | 0.045604107 | 1.109981848  |
| ENSRNOG00000001130  | Nos1           | 0.045630644 | 2.068974486  |
| ENSRNOG00000005391  | Prex2          | 0.045715373 | -0.870364144 |
| ENSRNOG00000054429  | AABR07011697.1 | 0.045744322 | 1.577541897  |
| ENSRNOG00000020773  | Map3k11        | 0.045756211 | 1.022836907  |
| ENSRNOG00000017837  | Znf48          | 0.045899514 | 1.364267266  |
| ENSRNOG00000008036  | Dennd4c        | 0.045910863 | 1.3315165    |
| ENSRNOG00000028025  | Aknad1         | 0.045969984 | 1.679029667  |
| ENSRNOG00000047225  | Tma7           | 0.046038705 | -0.782112582 |
| ENSRNOG00000024602  | Plekha7        | 0.046130137 | 2.044631067  |
| ENSRNOG00000000693  | #N/A           | 0.046150974 | 1.465849806  |
| ENSRNOG000000061524 | AABR07068285.2 | 0.046163986 | 1.615215703  |
| ENSRNOG00000015002  | Abhd15         | 0.046203    | 1.243111977  |
| ENSRNOG00000015911  | Lrp5           | 0.046209663 | 0.791525926  |
| ENSRNOG00000016391  | Arid4b         | 0.046242381 | -1.432262426 |
| ENSRNOG00000043060  | Dnajc4         | 0.04629055  | -0.821332139 |
| ENSRNOG00000018113  | AABR07028352.1 | 0.046306759 | 0.996454428  |
| ENSRNOG00000033346  | LOC100361636   | 0.046323684 | -1.814892469 |
| ENSRNOG00000016606  | Snorc          | 0.046448479 | -1.647196834 |
| ENSRNOG00000062091  | AC116220.2     | 0.046496003 | 1.78336609   |
| ENSRNOG00000020423  | Apc            | 0.046512638 | 0.945880427  |
| ENSRNOG00000012806  | Rbbp6          | 0.046548334 | -0.896566796 |
| ENSRNOG00000025332  | Cd109          | 0.046569025 | -1.325744345 |
| ENSRNOG00000013663  | Tmem86a        | 0.046579486 | 0.848619615  |
| ENSRNOG00000003463  | Srebf1         | 0.046623212 | 1.27172559   |
| ENSRNOG00000008425  | Nav1           | 0.046690253 | 1.399975253  |
| ENSRNOG00000023536  | Adgrd1         | 0.046707575 | 1.554051688  |
| ENSRNOG00000005183  | Rtf1           | 0.046767374 | -0.863133278 |
| ENSRNOG00000032327  | Pdia5          | 0.046778474 | -0.74095816  |
| ENSRNOG00000007097  | Gpatch3        | 0.046918958 | 1.70006843   |
| ENSRNOG00000027728  | Ibtk           | 0.046991986 | 0.829764116  |
| ENSRNOG00000017523  | H6pd           | 0.04699258  | 1.1326455    |
| ENSRNOG00000004563  | Sec24a         | 0.047140775 | 1.337728233  |
| ENSRNOG00000002585  | Cul4b          | 0.047305856 | -1.083624954 |
| ENSRNOG00000008113  | RGD1561149     | 0.047408228 | 1.122768373  |
| ENSRNOG00000009683  | Sdcbp          | 0.047569866 | -0.922629988 |
| ENSRNOG00000009965  | Pih1d2         | 0.047614072 | -1.005445292 |
| ENSRNOG00000010895  | Tmem30a        | 0.047662026 | 0.873908447  |
| ENSRNOG00000050978  | LOC100911295   | 0.047684957 | 0.846003672  |

|                    |                |             |              |
|--------------------|----------------|-------------|--------------|
| ENSRNOG00000023086 | LOC100360828   | 0.04771596  | -1.046545453 |
| ENSRNOG00000052087 | Ubap2          | 0.047853255 | 1.037222429  |
| ENSRNOG00000046405 | Hic1           | 0.047911187 | -1.068819635 |
| ENSRNOG00000012420 | Bcl9l          | 0.04803852  | 1.518278241  |
| ENSRNOG00000000961 | #N/A           | 0.048056022 | 0.874052817  |
| ENSRNOG00000020289 | Akt1s1         | 0.048072115 | 0.787029008  |
| ENSRNOG00000026143 | Ckap2l         | 0.048240775 | 1.176629648  |
| ENSRNOG00000009653 | Numb           | 0.048252856 | 1.142388576  |
| ENSRNOG00000053654 | AABR07061614.3 | 0.048293392 | 1.369661209  |
| ENSRNOG00000046803 | Arhgef16       | 0.048325281 | 0.821432215  |
| ENSRNOG00000026519 | LOC100364062   | 0.048367925 | 1.238577759  |
| ENSRNOG00000018475 | #N/A           | 0.04845094  | 1.03324472   |
| ENSRNOG00000018980 | Tjap1          | 0.048558734 | 0.876708685  |
| ENSRNOG00000060946 | Cask           | 0.048570376 | 1.355096708  |
| ENSRNOG00000033496 | Igdcc4         | 0.048585247 | 2.136812122  |
| ENSRNOG00000047495 | AABR07049948.1 | 0.048721696 | 1.386011558  |
| ENSRNOG00000013314 | Avl9           | 0.0487437   | 1.231686088  |
| ENSRNOG00000058515 | AABR07054460.4 | 0.048807952 | 2.37270361   |
| ENSRNOG00000060594 | LOC100911672   | 0.048842643 | 1.065139613  |
| ENSRNOG00000003694 | Prox1          | 0.048872789 | 0.95291863   |
| ENSRNOG00000050343 | Jmy            | 0.048916608 | 1.795056301  |
| ENSRNOG00000018066 | Bccip          | 0.048919147 | 0.795173221  |
| ENSRNOG00000020426 | #N/A           | 0.049367678 | 0.951243349  |
| ENSRNOG00000036677 | Slc16a3        | 0.049434122 | 1.19289643   |
| ENSRNOG00000056212 | Flt3lg         | 0.049494629 | -0.937439372 |
| ENSRNOG00000038004 | Zfp804a        | 0.049580607 | 1.03322235   |
| ENSRNOG00000016294 | Cd4            | 0.049643077 | 1.735970624  |
| ENSRNOG00000056770 | AABR07002875.1 | 0.049652757 | -1.399211904 |
| ENSRNOG00000009110 | Psen1          | 0.049664213 | 1.031053316  |
| ENSRNOG00000027949 | Rfx6           | 0.049705654 | -0.848689585 |
| ENSRNOG00000015953 | Oaz2           | 0.049711603 | 1.135045831  |
| ENSRNOG00000051564 | Rap2a          | 0.049744421 | 1.076566104  |
| ENSRNOG00000008658 | Mitf           | 0.04983322  | -1.219448184 |
| ENSRNOG00000050860 | Abcb11         | 0.04984946  | -1.212798916 |
| ENSRNOG00000002021 | Son            | 0.049908408 | -0.739601377 |
| ENSRNOG00000033202 | Fbxo41         | 0.049929639 | 1.927258332  |
| ENSRNOG00000018714 | Arl5b          | 0.049943607 | -0.856134166 |
| ENSRNOG00000021105 | Gabpb2         | 0.04995346  | 1.031974398  |
| ENSRNOG00000019645 | Osbp2          | 0.049984021 | 0.886463663  |

**Supplementary Table S4.** NCBI gene IDs used in investigation of gene expression by qPCR.

| Gene name | NCBI I.D       |
|-----------|----------------|
| Ins1      | NM_019129.3    |
| Ins2      | NM_019130.2    |
| Tgs1      | NM_001107904.1 |
| MafA      | NM_001399773.1 |
| GAPDH     | NM_017008.4    |
| Pdx1      | NM_022852.4    |
| Hdac5     | NM_053450      |
| Munc18    | NM_013038      |
| NeuroD1   | NM_019218      |
| PRIP      | NM_001276714   |
| SNAP25    | NM_001270576   |
| Pax6      | NM_013001.2    |
| Gnas      | NM_001024823.4 |
| Kcnj11    | NM_031358.3    |
| Gpr119    | NM_181770.1    |
| Kcnn1     | NM_019313.1    |
| Rab3A     | NM_013018.2    |
| Gpi       | NM_207592.1    |
| Klf11     | NM_001037354.2 |
| Nr4A1     | NM_024388.2    |
| Syt11     | NM_031667.3    |
| Syt13     | NM_030839.3    |
